# Supplementary material for: Visible-light-driven enantioselective intermolecular [2 + 2] photocyclization utilizing bathochromic excitation mediated by a chiral phosphoric acid
Source: Royal Society of Chemistry journal article supplement (doi:10.1039/d3ob01425h), 2023-01-01

**Visible-light driven enantioselective intermolecular photocyclization via bathochromic excitation by  
chiral phosphoric acid**

Tatsuhiko Uchikura, Kazuki Takahashi, Tatsushi Oishi, and Takahiko Akiyama\*

Department of Chemistry, Faculty of Science, Gakushuin University, 1-5-1, Mejiro, Toshima-ku, Tokyo 171-8588,  
Japan

*Email: takahiko.akiyama@gakushuin.ac.jp*

---

| Contents                                                                            | Page |
|-------------------------------------------------------------------------------------|------|
| 1. General methods                                                                  | S2   |
| 2. Additional data of condition screening                                           | S3   |
| 3. Synthetic procedures and characterization of new compounds                       |      |
| 3-1. General procedure of [2+2] cycloaddition                                       | S6   |
| 3-2. Synthesis of <b>2</b>                                                          | S17  |
| 4. Mechanistic studies                                                              |      |
| 4-1. UV–Vis spectra                                                                 | S23  |
| 4-2. <sup>1</sup> H NMR study                                                       | S24  |
| 4-3. Correlation between ee of <b>1b</b> and ee of <b>3ab</b> in photocycloaddition | S25  |
| 4-4. Correlation between ee of <b>1b</b> and ee of <b>3ag</b> in photocycloaddition | S26  |
| 4-5. DFT calculation                                                                | S27  |
| 5. HPLC data                                                                        | S32  |
| 6. NMR spectra                                                                      | S52  |

---

## 1. General methods

All operations were performed under nitrogen unless otherwise noted. NMR spectra for products data ( $^1\text{H}$  and  $^{13}\text{C}$ ) were recorded on a Bruker AVANCE-III (400 MHz for  $^1\text{H}$ , 100 MHz for  $^{13}\text{C}$ , 376 MHz for  $^{19}\text{F}$ ) and JEOL ECZ-400 (400 MHz for  $^1\text{H}$ , 100 MHz for  $^{13}\text{C}$ , 376 MHz for  $^{19}\text{F}$ ) spectrometer using  $\text{CDCl}_3$  [tetramethylsilane (0 ppm) served as an internal standard in  $^1\text{H}$  NMR and  $\text{CDCl}_3$  (77.0 ppm) in  $^{13}\text{C}$  NMR, hexafluorobenzene ( $-163.9$  ppm) or benzotrifluoride ( $-63.7$  ppm) served as an internal or external standard in  $^{19}\text{F}$  NMR]. Chemical shifts are expressed in parts per million (ppm). ESI mass analyses were performed on Bruker micrOTOF mass spectrometer. IR spectra were recorded on a FT/IR-4200 (JASCO Co., Ltd.). UV-Vis spectra were recorded on a V-670 UV-VIS-NIR spectrometer (JASCO Co., Ltd.). Emission spectra were recorded on a FP-6500 (JASCO Co., Ltd.). Visible light irradiation was performed with LED405-100STND (Optcode Co., Ltd.) for 405 nm LED and Twin LED Light (Relyon Co., Ltd.) for 365 nm LED. High performance liquid chromatography (HPLC) was performed on a Chromaster (Hitachi High-Tech Co., Ltd.) with CHIRALPak<sup>®</sup> IF (Daicel Co., Ltd.).

Solvents were distilled according to the usual procedures and stored over molecular sieves unless otherwise noted. All of the substrates were purified by distillation (for liquid) or recrystallization (for solid). Other chemicals were purchased and used as received.

## 2. Additional data of conditions screening

**Table S1. Screening of conditions of [2+2] photocycloaddition**

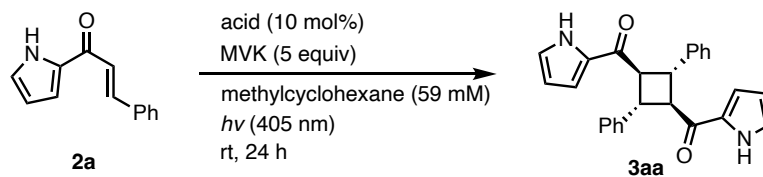

| entry            | acid                    | solvent                         | yield |
|------------------|-------------------------|---------------------------------|-------|
| 1                | –                       | toluene                         | 2.1%  |
| 2                | <b>1a</b>               | toluene                         | 21%   |
| 3                | <b>1c</b>               | toluene                         | 3.6%  |
| 4                | <b>1d</b>               | toluene                         | 1.5%  |
| 5                | <b>1e</b>               | toluene                         | 7.5%  |
| 6                | <b>1f</b>               | toluene                         | 8.4%  |
| 7                | –                       | CyMe                            | <1%   |
| 8                | <b>1a</b>               | CyMe                            | 57%   |
| 9                | <b>1b</b>               | CyMe                            | 23%   |
| 10               | <b>1g</b>               | CyMe                            | 0%    |
| 11               | diphenylphosphoric acid | CyMe                            | 23%   |
| 12               | benzoic acid            | CyMe                            | 1.5%  |
| 13               | TsOH·H <sub>2</sub> O   | CyMe                            | 1.5%  |
| 14               | TFA                     | CyMe                            | 33%   |
| 15               | <b>1a</b>               | benzene                         | 3.0%  |
| 16               | <b>1a</b>               | cyclohexane                     | 20%   |
| 17               | <b>1a</b>               | PhCF <sub>3</sub>               | 1.9%  |
| 18               | <b>1a</b>               | CH <sub>2</sub> Cl <sub>2</sub> | 1.1%  |
| 19               | <b>1a</b>               | <i>m</i> -xylene                | 1.4%  |
| 20 <sup>a)</sup> | <b>1a</b>               | CyMe                            | 22%   |

a) 29 mM.

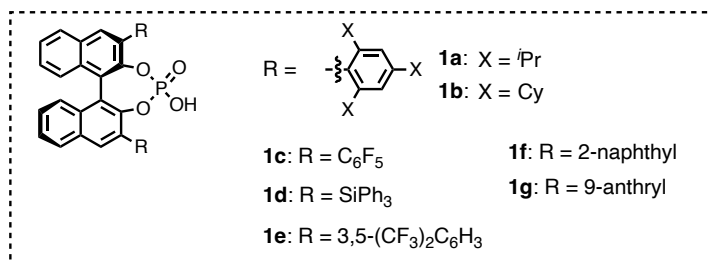

**Table S2. Screening of conditions of enantioselective [2+2] photocycloaddition**

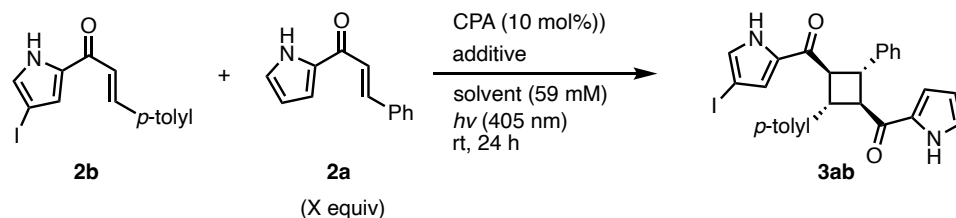

| entry            | CPA       | solvent           | additive             | X | <b>3ab</b> |                | <b>3bb</b>     |
|------------------|-----------|-------------------|----------------------|---|------------|----------------|----------------|
|                  |           |                   |                      |   | yield      | ee             |                |
| 1                | <b>1a</b> | toluene           | MVK (5 equiv)        | 1 | 17%        | 68%            | 11%            |
| 2                | <b>1b</b> | toluene           | MVK (5 equiv)        | 1 | 40%        | 90%            | 30%            |
| 3                | <b>1c</b> | toluene           | MVK (5 equiv)        | 1 | < 1.0%     | 0%             | 6%             |
| 4                | <b>1d</b> | toluene           | MVK (5 equiv)        | 1 | 3.8%       | — <sup>a</sup> | 6%             |
| 5                | <b>1b</b> | CyMe              | MVK (5 equiv)        | 1 | 37%        | 83%            | 5.0%           |
| 6                | <b>1b</b> | DCM               | MVK (5 equiv)        | 1 | 28%        | 76%            | 42%            |
| 7                | <b>1b</b> | PhCF <sub>3</sub> | MVK (5 equiv)        | 1 | 18%        | 87%            | 4.0%           |
| 8                | <b>1b</b> | toluene           | none                 | 1 | 25%        | 84%            | 22%            |
| 9                | <b>1b</b> | toluene           | MVK (3 equiv)        | 1 | 36%        | 88%            | 37%            |
| 10               | <b>1b</b> | toluene           | MVK (10 equiv)       | 1 | 44%        | 87%            | 38%            |
| 11               | <b>1b</b> | toluene           | MVK (50 equiv)       | 1 | 34%        | 72%            | 42%            |
| 12               | <b>1b</b> | toluene           | 2-butanone (5 equiv) | 1 | 34%        | 86%            | 25%            |
| 13               | <b>1b</b> | toluene           | MVK (10 equiv)       | 1 | 44%        | 87%            | 38%            |
| 14               | <b>1b</b> | toluene           | acetophenone         | 1 | 17%        | 72%            | — <sup>e</sup> |
| 15               | <b>1b</b> | toluene           | MS4A (100 wt%)       | 1 | 0%         | —              | 0%             |
| 16               | <b>1b</b> | toluene           | MVK (5 equiv)        | 3 | 85%        | 98%            | 11%            |
| 17 <sup>a)</sup> | —         | toluene           | MVK (5 equiv)        | 3 | 0%         | —              | 0%             |
| 18 <sup>b)</sup> | <b>1b</b> | toluene           | MVK (5 equiv)        | 3 | 0%         | —              | 0%             |
| 19 <sup>c)</sup> | <b>1b</b> | toluene           | MVK (5 equiv)        | 3 | 80%        | 98%            | — <sup>e</sup> |
| 20 <sup>d)</sup> | <b>1b</b> | toluene           | MVK (5 equiv)        | 3 | 78%        | 98%            | — <sup>e</sup> |
| 21               | <b>1h</b> | toluene           | MVK (5 equiv)        | 3 | 23%        | 89%            | — <sup>e</sup> |

a) Without CPA.  
 b) Under dark conditions.  
 c) Under air  
 d) Under oxygen  
 e) Not isolated.

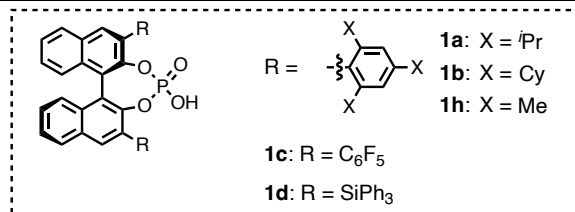

Scheme S1. Selectivity of *homo-* or *hetero-* coupling products

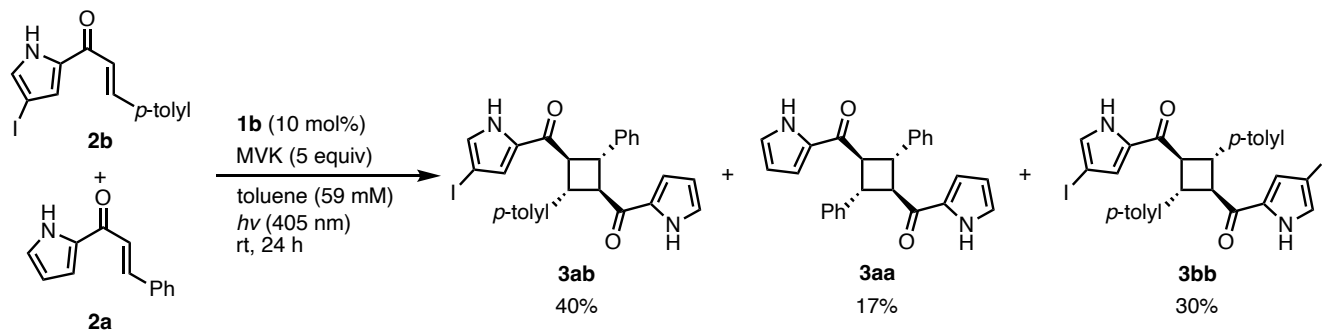

### 3. Synthetic procedures and characterization of new compounds

#### 3-1. General procedure of [2+2] cycloaddition (Procedure I)

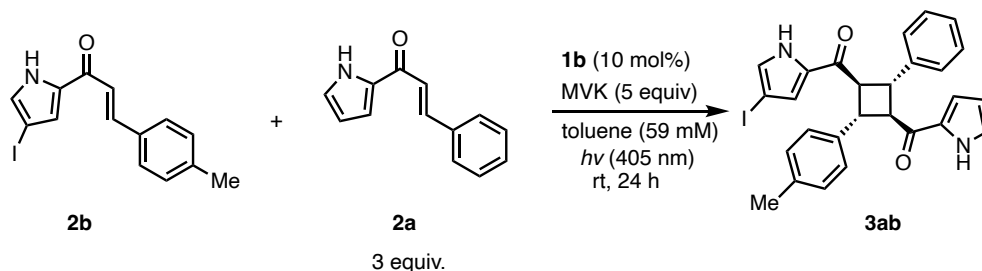

In a dried test tube, **2a** (17.3 mg, 0.088 mmol), **2b** (9.9 mg, 0.029 mmol), **1b** (1.0 mg, 0.0029 mmol), methyl vinyl ketone (12.3  $\mu$ L, 0.145 mmol) and were mixed in toluene (0.5 mL), and degassed three times by the freeze-pump-thaw. The mixture was irradiated with 405 nm violet LED for 24 h. After the irradiation, the solvent was removed. The crude mixture was purified by preparative TLC on SiO<sub>2</sub> (toluene: ethyl acetate = 7 : 3) to give **3ab** (13.3 mg, 24.9  $\mu$ mol) in 85%.

The reactions of other substrates in Figure 2 were performed based on this Procedure I.

#### Data of products

|                                                                                     |                                                                                                                                                                                                                                                        |
|-------------------------------------------------------------------------------------|--------------------------------------------------------------------------------------------------------------------------------------------------------------------------------------------------------------------------------------------------------|
| <b>3aa</b>                                                                          | White powder                                                                                                                                                                                                                                           |
| 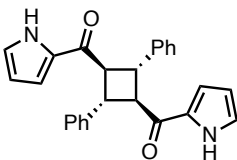 | <sup>1</sup> H NMR (400 MHz, CDCl <sub>3</sub> ) $\delta$ 9.58 (brs, 2H), 7.32 (d, $J$ = 4.0 Hz, 8H), 7.28 – 7.21 (m, 2H), 7.00 (ddd, $J$ = 2.7, 2.7, 1.3 Hz, 2H), 6.37 – 6.31 (m, 2H), 6.11 – 6.04 (m, 2H), 4.24 – 4.14 (m, 2H), 4.04 – 3.97 (m, 2H). |
|                                                                                     | <sup>13</sup> C NMR (100 MHz, CDCl <sub>3</sub> ): $\delta$ 188.0, 141.6, 131.4, 128.7, 127.3, 127.1, 125.2, 117.0, 110.7, 52.4, 42.6.                                                                                                                 |
|                                                                                     | LRMS (ESI): $m/z$ = 417 [M+Na].                                                                                                                                                                                                                        |
|                                                                                     | HRMS (ESI): Calcd for C <sub>26</sub> H <sub>22</sub> N <sub>2</sub> NaO <sub>2</sub> : 417.1579. Found 417.1573.                                                                                                                                      |
|                                                                                     | IR (neat, cm <sup>-1</sup> ): 3274, 1624, 1403.                                                                                                                                                                                                        |

|                                                                                   |                                                                                                                                                                                                                                                                                                                                                                                                                                                                                                                    |
|-----------------------------------------------------------------------------------|--------------------------------------------------------------------------------------------------------------------------------------------------------------------------------------------------------------------------------------------------------------------------------------------------------------------------------------------------------------------------------------------------------------------------------------------------------------------------------------------------------------------|
| <b>3ab</b>                                                                        | White powder.                                                                                                                                                                                                                                                                                                                                                                                                                                                                                                      |
| 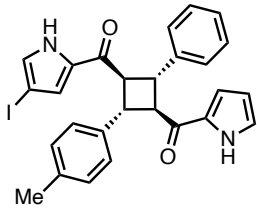 | <sup>1</sup> H NMR (400 MHz, CDCl <sub>3</sub> ) δ 9.51 (brs, 1H), 9.44 (brs, 1H), 7.38 – 7.28 (m, 5H), 7.20 (d, <i>J</i> = 8.1 Hz, 2H), 7.15 (d, <i>J</i> = 8.0 Hz, 2H), 7.02 (dd, <i>J</i> = 2.9, 1.3 Hz, 1H), 7.00 (ddd, <i>J</i> = 2.7, 2.7, 1.2 Hz, 1H), 6.39 – 6.34 (m, 1H), 6.30 (dd, <i>J</i> = 2.5, 1.4 Hz, 1H), 6.09 (dt, <i>J</i> = 3.9, 2.5 Hz, 1H), 4.16 (t, <i>J</i> = 9.3 Hz, 1H), 4.07 (t, <i>J</i> = 9.3 Hz, 1H), 3.99 (t, <i>J</i> = 9.3 Hz, 1H), 3.87 (t, <i>J</i> = 9.3 Hz, 1H), 2.35 (s, 3H). |
|                                                                                   | <sup>13</sup> C NMR (100 MHz, CDCl <sub>3</sub> ): δ 187.9, 187.5, 141.3, 138.1, 136.9, 132.8, 131.4, 129.8, 129.4, 128.8, 127.2, 127.1, 125.3, 123.5, 117.1, 110.8, 62.0, 52.9, 52.2, 42.7, 42.3, 21.1.                                                                                                                                                                                                                                                                                                           |
|                                                                                   | LRMS (ESI): <i>m/z</i> = 557 [M+Na].                                                                                                                                                                                                                                                                                                                                                                                                                                                                               |
|                                                                                   | HRMS (ESI): Calcd for C <sub>27</sub> H <sub>23</sub> IN <sub>2</sub> NaO <sub>2</sub> , 557.0702: Found 557.0696.                                                                                                                                                                                                                                                                                                                                                                                                 |
|                                                                                   | IR (neat, cm <sup>-1</sup> ): 3293, 1625, 1395.                                                                                                                                                                                                                                                                                                                                                                                                                                                                    |
|                                                                                   | [α] <sub>D</sub> <sup>24</sup> -14.5 (c 0.3, CHCl <sub>3</sub> ).                                                                                                                                                                                                                                                                                                                                                                                                                                                  |

|                                                                                     |                                                                                                                                                                                                                                                                                                                                                                                                                                                                                                                    |
|-------------------------------------------------------------------------------------|--------------------------------------------------------------------------------------------------------------------------------------------------------------------------------------------------------------------------------------------------------------------------------------------------------------------------------------------------------------------------------------------------------------------------------------------------------------------------------------------------------------------|
| <b>3ac</b>                                                                          | White powder.                                                                                                                                                                                                                                                                                                                                                                                                                                                                                                      |
| 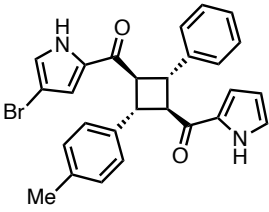 | <sup>1</sup> H NMR (400 MHz, CDCl <sub>3</sub> ) δ 9.57 (brs, 1H), 9.49 (brs, 1H), 7.38 – 7.27 (m, 5H), 7.20 (d, <i>J</i> = 8.1 Hz, 2H), 7.15 (d, <i>J</i> = 8.1 Hz, 2H), 7.00 (ddd, <i>J</i> = 2.7, 2.7, 1.3 Hz, 1H), 6.97 (dd, <i>J</i> = 3.0, 1.4 Hz, 1H), 6.38 – 6.33 (m, 1H), 6.25 (dd, <i>J</i> = 2.7, 1.4 Hz, 1H), 6.09 (dt, <i>J</i> = 3.9, 2.5 Hz, 1H), 4.17 (t, <i>J</i> = 9.4 Hz, 1H), 4.09 (t, <i>J</i> = 9.3 Hz, 1H), 3.99 (t, <i>J</i> = 9.4 Hz, 1H), 3.87 (t, <i>J</i> = 9.3 Hz, 1H), 2.34 (s, 3H). |
|                                                                                     | <sup>13</sup> C NMR (100 MHz, CDCl <sub>3</sub> ): δ 187.9, 187.8, 141.3, 138.2, 136.9, 131.4, 131.3, 129.4, 128.8, 127.20, 127.17, 127.1, 125.2, 124.8, 118.3, 117.0, 110.8, 98.0, 52.8, 52.4, 42.6, 42.2, 21.1.                                                                                                                                                                                                                                                                                                  |
|                                                                                     | LRMS (ESI): <i>m/z</i> = 507, 509 [M+Na].                                                                                                                                                                                                                                                                                                                                                                                                                                                                          |
|                                                                                     | HRMS (ESI): Calcd for C <sub>27</sub> H <sub>23</sub> BrN <sub>2</sub> NaO <sub>2</sub> , 509.0840: Found 509.0814.                                                                                                                                                                                                                                                                                                                                                                                                |
|                                                                                     | IR (neat, cm <sup>-1</sup> ): 3279, 1631, 1395.                                                                                                                                                                                                                                                                                                                                                                                                                                                                    |
|                                                                                     | [α] <sub>D</sub> <sup>24</sup> +13.0 (c 0.2, CHCl <sub>3</sub> ).                                                                                                                                                                                                                                                                                                                                                                                                                                                  |

|            |                                                                                                                                                                                                                                                                                                                                                                                                                                                                     |
|------------|---------------------------------------------------------------------------------------------------------------------------------------------------------------------------------------------------------------------------------------------------------------------------------------------------------------------------------------------------------------------------------------------------------------------------------------------------------------------|
| <b>3ad</b> | White powder.                                                                                                                                                                                                                                                                                                                                                                                                                                                       |
|            | $^1\text{H NMR}$ (400 MHz, $\text{CDCl}_3$ ) $\delta$ 9.69 (brs, 1H), 9.63 (brs, 1H), 7.37 – 7.27 (m, 5H), 7.20 (d, $J$ = 8.1 Hz, 2H), 7.15 (d, $J$ = 8.0 Hz, 2H), 7.01 (ddd, $J$ = 2.7, 2.7, 1.3 Hz, 1H), 6.94 (dd, $J$ = 3.1, 1.5 Hz, 1H), 6.39 – 6.33 (m, 1H), 6.19 (dd, $J$ = 2.7, 1.5 Hz, 1H), 6.09 (dt, $J$ = 3.9, 2.5 Hz, 1H), 4.18 (t, $J$ = 9.4 Hz, 1H), 4.09 (t, $J$ = 9.3 Hz, 1H), 3.99 (t, $J$ = 9.3 Hz, 1H), 3.88 (t, $J$ = 9.3 Hz, 1H), 2.34 (s, 3H). |
|            | $^{13}\text{C NMR}$ (100 MHz, $\text{CDCl}_3$ ): $\delta$ 188.0, 187.9, 141.3, 138.2, 136.9, 131.4, 130.3, 129.4, 128.8, 127.19, 127.16, 127.1, 125.3, 122.6, 117.1, 115.8, 114.2, 110.8, 52.7, 52.4, 42.6, 42.2, 21.1.                                                                                                                                                                                                                                             |
|            | LRMS (ESI): $m/z$ = 463, 465 [M+Na].                                                                                                                                                                                                                                                                                                                                                                                                                                |
|            | HRMS (ESI): Calcd for $\text{C}_{27}\text{H}_{23}\text{ClN}_2\text{NaO}_2$ , 465.1346: Found 465.1346.                                                                                                                                                                                                                                                                                                                                                              |
|            | IR (neat, $\text{cm}^{-1}$ ): 3272, 1628, 1396.                                                                                                                                                                                                                                                                                                                                                                                                                     |
|            | $[\alpha]_{\text{D}}^{24}$ -29.1 (c 0.2, $\text{CHCl}_3$ ).                                                                                                                                                                                                                                                                                                                                                                                                         |

|            |                                                                                                                                                                                                                                                                                                                                                                                                                    |
|------------|--------------------------------------------------------------------------------------------------------------------------------------------------------------------------------------------------------------------------------------------------------------------------------------------------------------------------------------------------------------------------------------------------------------------|
| <b>3ae</b> | Colorless oil.                                                                                                                                                                                                                                                                                                                                                                                                     |
|            | $^1\text{H NMR}$ (400 MHz, $\text{CDCl}_3$ ) $\delta$ 9.47 (brs, 1H), 9.19 (brs, 1H), 7.37 – 7.30 (m, 5H), 7.25 – 7.21 (m, 2H), 7.17 – 7.11 (m, 2H), 6.99 (ddd, $J$ = 2.7, 2.7, 1.3 Hz, 1H), 6.78 (dd, $J$ = 2.8, 1.6 Hz, 1H), 6.41 – 6.36 (m, 1H), 6.08 (dt, $J$ = 3.8, 2.5 Hz, 1H), 5.99 (dd, $J$ = 2.6, 1.6 Hz, 1H), 4.21 – 4.12 (m, 1H), 4.09 – 4.00 (m, 2H), 3.93 – 3.84 (m, 1H), 2.33 (s, 3H), 1.02 (s, 9H). |
|            | $^{13}\text{C NMR}$ (100 MHz, $\text{CDCl}_3$ ): $\delta$ 188.1, 187.5, 141.8, 138.6, 137.5, 136.7, 131.5, 130.7, 129.3, 128.6, 127.4 (2C), 127.0, 124.9, 120.6, 116.8, 114.7, 110.7, 53.5, 52.1, 42.7, 42.0, 31.3, 30.2, 21.1.                                                                                                                                                                                    |
|            | LRMS (ESI): $m/z$ = 487 [M+Na].                                                                                                                                                                                                                                                                                                                                                                                    |
|            | HRMS (ESI): Calcd for $\text{C}_{31}\text{H}_{32}\text{N}_2\text{NaO}_2$ , 487.2361: Found 487.2356.                                                                                                                                                                                                                                                                                                               |
|            | IR (neat, $\text{cm}^{-1}$ ): 3277, 2957, 1625, 1400.                                                                                                                                                                                                                                                                                                                                                              |
|            | $[\alpha]_{\text{D}}^{24}$ -1.0 (c 0.2, $\text{CHCl}_3$ ).                                                                                                                                                                                                                                                                                                                                                         |



|            |                                                                                                                                                                                                                                                                                                                                                                                                                                                                                             |
|------------|---------------------------------------------------------------------------------------------------------------------------------------------------------------------------------------------------------------------------------------------------------------------------------------------------------------------------------------------------------------------------------------------------------------------------------------------------------------------------------------------|
| <b>3af</b> | White powder.                                                                                                                                                                                                                                                                                                                                                                                                                                                                               |
|            | <sup>1</sup> H NMR (400 MHz, CDCl <sub>3</sub> ): δ 9.68 (brs, 1H), 9.41 (brs, 1H), 7.35 – 7.28 (m, 4H), 7.25 – 7.18 (m, 3H), 7.13 (d, <i>J</i> = 7.9 Hz, 2H), 7.03 – 6.99 (m, 1H), 6.80 – 6.75 (m, 1H), 6.41 – 6.35 (m, 1H), 6.12 – 6.06 (m, 2H), 4.19 (t, <i>J</i> = 9.4 Hz, 1H), 4.10 (t, <i>J</i> = 9.4 Hz, 1H), 3.99 (t, <i>J</i> = 9.4 Hz, 1H), 3.92 (t, <i>J</i> = 9.4 Hz, 1H), 2.33 (s, 3H), 2.26 (t, <i>J</i> = 7.6 Hz, 2H), 1.39 – 1.13 (m, 8H), 0.88 (t, <i>J</i> = 6.9 Hz, 3H). |
|            | <sup>13</sup> C NMR (100 MHz, CDCl <sub>3</sub> ): δ 188.2, 187.7, 141.8, 138.6, 136.6, 131.5, 131.0, 129.3, 128.6, 127.3, 127.2, 126.9, 126.9, 125.2, 123.2, 117.0, 116.9, 110.6, 52.8, 52.4, 42.6, 42.2, 31.6, 30.6, 28.8, 26.4, 22.6, 21.1, 14.1.                                                                                                                                                                                                                                        |
|            | LRMS (ESI): <i>m/z</i> = 515 [M+Na].                                                                                                                                                                                                                                                                                                                                                                                                                                                        |
|            | HRMS (ESI): Calcd for C <sub>33</sub> H <sub>36</sub> N <sub>2</sub> NaO <sub>2</sub> , 515.2674: Found 515.2659.                                                                                                                                                                                                                                                                                                                                                                           |
|            | IR (neat, cm <sup>-1</sup> ): 3274, 2924, 1624, 1402.                                                                                                                                                                                                                                                                                                                                                                                                                                       |
|            | [α] <sub>D</sub> <sup>24</sup> +30.3 (c 0.2, CHCl <sub>3</sub> ).                                                                                                                                                                                                                                                                                                                                                                                                                           |

|            |                                                                                                                                                                                                                                                                                                                                                                                                                                                                                                                                                                                                      |
|------------|------------------------------------------------------------------------------------------------------------------------------------------------------------------------------------------------------------------------------------------------------------------------------------------------------------------------------------------------------------------------------------------------------------------------------------------------------------------------------------------------------------------------------------------------------------------------------------------------------|
| <b>3ag</b> | White powder.                                                                                                                                                                                                                                                                                                                                                                                                                                                                                                                                                                                        |
|            | <sup>1</sup> H NMR (400 MHz, CDCl <sub>3</sub> ) δ 9.47 (brs, 1H), 9.41 (brs, 1H), 7.35 – 7.22 (m, 5H), 7.19 (d, <i>J</i> = 8.1 Hz, 2H), 7.13 (d, <i>J</i> = 7.8 Hz, 2H), 7.08 (dd, <i>J</i> = 3.0, 1.4 Hz, 1H), 7.00 (ddd, <i>J</i> = 2.7, 2.7, 1.3 Hz, 1H), 6.40 (dd, <i>J</i> = 2.6, 1.4 Hz, 1H), 6.37 – 6.34 (m, 1H), 6.09 (dt, <i>J</i> = 3.9, 2.5 Hz, 1H), 4.18 (t, <i>J</i> = 9.4 Hz, 1H), 4.10 (t, <i>J</i> = 9.3 Hz, 1H), 3.95 (t, <i>J</i> = 9.4 Hz, 1H), 3.92 (t, <i>J</i> = 9.4 Hz, 1H), 2.35 – 2.29 (m, 5H), 1.56 – 1.47 (m, 2H), 1.47 – 1.37 (m, 2H), 0.93 (t, <i>J</i> = 7.3 Hz, 3H). |
|            | <sup>13</sup> C NMR (100 MHz, CDCl <sub>3</sub> ): δ 188.3, 188.0, 141.5, 138.3, 136.8, 131.5, 131.0, 129.4, 128.7, 128.0, 127.12, 127.07, 125.1, 119.4, 117.0, 110.7, 107.7, 89.2, 73.5, 52.5, 52.3, 42.7, 42.3, 30.8, 21.9, 21.1, 19.0, 13.6.                                                                                                                                                                                                                                                                                                                                                      |
|            | LRMS (ESI): <i>m/z</i> = 511 [M+Na].                                                                                                                                                                                                                                                                                                                                                                                                                                                                                                                                                                 |
|            | HRMS (ESI): Calcd for C <sub>33</sub> H <sub>32</sub> N <sub>2</sub> NaO <sub>2</sub> , 511.2361: Found 511.2356                                                                                                                                                                                                                                                                                                                                                                                                                                                                                     |
|            | IR (neat, cm <sup>-1</sup> ): 3272, 2927, 1627, 1401.                                                                                                                                                                                                                                                                                                                                                                                                                                                                                                                                                |
|            | [α] <sub>D</sub> <sup>24</sup> +2.9 (c 0.2, CHCl <sub>3</sub> ).                                                                                                                                                                                                                                                                                                                                                                                                                                                                                                                                     |

|            |                                                                                                                                                                                                                                                                                                                                                                                                                                                                            |
|------------|----------------------------------------------------------------------------------------------------------------------------------------------------------------------------------------------------------------------------------------------------------------------------------------------------------------------------------------------------------------------------------------------------------------------------------------------------------------------------|
| <b>3ah</b> | White powder.                                                                                                                                                                                                                                                                                                                                                                                                                                                              |
|            | $^1\text{H NMR}$ (400 MHz, $\text{CDCl}_3$ ) $\delta$ 9.55 (brs, 1H), 9.52 (brs, 1H), 7.35 – 7.21 (m, 5H), 7.18 (d, $J$ = 8.1 Hz, 2H), 7.16 – 7.12 (m, 2H), 7.08 (dd, $J$ = 3.0, 1.4 Hz, 1H), 7.01 (ddd, $J$ = 2.7, 2.7, 1.3 Hz, 1H), 6.40 (dd, $J$ = 2.6, 1.4 Hz, 1H), 6.39 – 6.35 (m, 1H), 6.09 (dt, $J$ = 3.9, 2.5 Hz, 1H), 4.20 (t, $J$ = 9.4 Hz, 1H), 4.09 (t, $J$ = 9.4 Hz, 1H), 3.97 (t, $J$ = 9.4 Hz, 1H), 3.92 (t, $J$ = 9.4 Hz, 2H), 2.33 (s, 3H), 1.25 (s, 9H). |
|            | $^{13}\text{C NMR}$ (100 MHz, $\text{CDCl}_3$ ): $\delta$ 188.3, 188.0, 141.5, 138.3, 136.7, 131.5, 131.0, 129.4, 128.7, 128.0, 127.11, 127.10, 127.0, 125.1, 119.7, 117.0, 110.7, 107.6, 97.4, 71.9, 52.4, 52.4, 42.9, 42.3, 31.0, 27.9, 21.1.                                                                                                                                                                                                                            |
|            | LRMS (ESI): $m/z$ = 511 [M+Na].                                                                                                                                                                                                                                                                                                                                                                                                                                            |
|            | HRMS (ESI): Calcd for $\text{C}_{33}\text{H}_{32}\text{N}_2\text{NaO}_2$ , 511.2361: Found 511.2356.                                                                                                                                                                                                                                                                                                                                                                       |
|            | IR (neat, $\text{cm}^{-1}$ ): 3275, 2317, 1627, 1401.                                                                                                                                                                                                                                                                                                                                                                                                                      |
|            | $[\alpha]_{\text{D}}^{24}$ +2.9 (c 0.5, $\text{CHCl}_3$ ).                                                                                                                                                                                                                                                                                                                                                                                                                 |

|            |                                                                                                                                                                                                                                                                                                                                                                                                                                                                                                               |
|------------|---------------------------------------------------------------------------------------------------------------------------------------------------------------------------------------------------------------------------------------------------------------------------------------------------------------------------------------------------------------------------------------------------------------------------------------------------------------------------------------------------------------|
| <b>3ai</b> | White powder.                                                                                                                                                                                                                                                                                                                                                                                                                                                                                                 |
|            | $^1\text{H NMR}$ (400 MHz, $\text{CDCl}_3$ ) $\delta$ 9.59 (brs, 1H), 9.36 (brs, 1H), 7.55 (dd, $J$ = 3.2, 1.4 Hz, 1H), 7.38 – 7.23 (m, 5H), 7.23 – 7.19 (m, 2H), 7.15 (d, $J$ = 7.8 Hz, 2H), 6.99 (ddd, $J$ = 2.7, 2.7, 1.3 Hz, 1H), 6.70 (dd, $J$ = 2.6, 1.4 Hz, 1H), 6.37 – 6.31 (m, 1H), 6.09 (dt, $J$ = 3.8, 2.5 Hz, 1H), 4.21 (q, $J$ = 7.2 Hz, 2H), 4.17 (t, $J$ = 9.3 Hz, 1H), 4.12 – 4.06 (m, 1H), 3.99 (t, $J$ = 9.4 Hz, 1H), 3.98 (t, $J$ = 9.4 Hz, 1H), 2.34 (s, 3H), 1.28 (t, $J$ = 7.1 Hz, 3H). |
|            | $^{13}\text{C NMR}$ (100 MHz, $\text{CDCl}_3$ ): $\delta$ 189.0, 188.0, 163.7, 141.3, 138.1, 136.9, 131.7, 131.4, 129.4, 128.9, 128.8, 127.2, 127.1, 125.4, 118.4, 117.5, 117.3, 110.7, 60.0, 52.5, 42.6, 42.4, 21.1, 14.3.                                                                                                                                                                                                                                                                                   |
|            | LRMS (ESI): $m/z$ = 503 [M+Na].                                                                                                                                                                                                                                                                                                                                                                                                                                                                               |
|            | HRMS (ESI): Calcd for $\text{C}_{30}\text{H}_{28}\text{N}_2\text{NaO}_4$ , 503.1946: Found 503.1936.                                                                                                                                                                                                                                                                                                                                                                                                          |
|            | IR (neat, $\text{cm}^{-1}$ ): 3285, 1705, 1633, 1209.                                                                                                                                                                                                                                                                                                                                                                                                                                                         |
|            | $[\alpha]_{\text{D}}^{24}$ -22.3 (c 0.1, $\text{CHCl}_3$ ).                                                                                                                                                                                                                                                                                                                                                                                                                                                   |

|            |                                                                                                                                                                                                                                                                                                                                                                                                                                                                                                                      |
|------------|----------------------------------------------------------------------------------------------------------------------------------------------------------------------------------------------------------------------------------------------------------------------------------------------------------------------------------------------------------------------------------------------------------------------------------------------------------------------------------------------------------------------|
| <b>3bj</b> | Colorless oil.                                                                                                                                                                                                                                                                                                                                                                                                                                                                                                       |
|            | $^1\text{H NMR}$ (400 MHz, $\text{CDCl}_3$ ) $\delta$ 9.72 (brs, 1H), 9.59 (brs, 1H), 7.23 (d, $J = 8.6$ Hz, 2H), 7.19 (d, $J = 8.1$ Hz, 2H), 7.14 (d, $J = 8.1$ Hz, 2H), 7.03 (dd, $J = 3.0, 1.4$ Hz, 1H), 7.00 (ddd, $J = 2.7, 2.7, 1.3$ Hz, 1H), 6.88 (d, $J = 8.7$ Hz, 2H), 6.40 – 6.35 (m, 1H), 6.31 (dd, $J = 2.5, 1.4$ Hz, 1H), 6.09 (dt, $J = 3.9, 2.5$ Hz, 1H), 4.11 (t, $J = 9.3$ Hz, 1H), 4.03 (t, $J = 9.3$ Hz, 1H), 3.95 (t, $J = 9.3$ Hz, 1H), 3.82 (t, $J = 9.3$ Hz, 1H), 3.81 (s, 3H), 2.34 (s, 3H). |
|            | $^{13}\text{C NMR}$ (100 MHz, $\text{CDCl}_3$ ): $\delta$ 188.0, 187.6, 158.7, 138.3, 136.8, 133.4, 132.8, 131.4, 129.7, 129.4, 128.3, 127.1, 125.2, 123.5, 117.1, 114.1, 110.7, 62.0, 55.3, 53.3, 52.6, 42.4, 41.9, 21.1.                                                                                                                                                                                                                                                                                           |
|            | LRMS (ESI): $m/z = 587$ [M+Na].                                                                                                                                                                                                                                                                                                                                                                                                                                                                                      |
|            | HRMS (ESI): Calcd for $\text{C}_{28}\text{H}_{25}\text{IN}_2\text{NaO}_3$ , 587.0808: Found 587.0802.                                                                                                                                                                                                                                                                                                                                                                                                                |
|            | IR (neat, $\text{cm}^{-1}$ ): 3273, 1629, 1247.                                                                                                                                                                                                                                                                                                                                                                                                                                                                      |
|            | $[\alpha]_{\text{D}}^{24} +4.5$ (c 0.2, $\text{CHCl}_3$ ).                                                                                                                                                                                                                                                                                                                                                                                                                                                           |

|            |                                                                                                                                                                                                                                                                                                                                                                                                                                         |
|------------|-----------------------------------------------------------------------------------------------------------------------------------------------------------------------------------------------------------------------------------------------------------------------------------------------------------------------------------------------------------------------------------------------------------------------------------------|
| <b>3bk</b> | White powder.                                                                                                                                                                                                                                                                                                                                                                                                                           |
|            | $^1\text{H NMR}$ (400 MHz, $\text{CDCl}_3$ ) $\delta$ 9.47 (brs, 1H), 9.41 (brs, 1H), 7.45 (d, $J = 8.4$ Hz, 1H), 7.20 – 7.13 (m, 6H), 7.04 (dd, $J = 2.9, 1.3$ Hz, 1H), 7.01 (ddd, $J = 2.7, 2.7, 1.3$ Hz, 1H), 6.38 – 6.34 (m, 1H), 6.31 (dd, $J = 2.5, 1.4$ Hz, 1H), 6.11 (dt, $J = 3.9, 2.5$ Hz, 1H), 4.18 (t, $J = 9.3$ Hz, 1H), 4.00 (t, $J = 9.2$ Hz, 1H), 3.93 (t, $J = 9.3$ Hz, 1H), 3.81 (t, $J = 9.3$ Hz, 1H), 2.35 (s, 3H). |
|            | $^{13}\text{C NMR}$ (100 MHz, $\text{CDCl}_3$ ): $\delta$ 187.5, 187.1, 140.4, 137.8, 137.2, 132.7, 131.8, 131.3, 129.7, 129.5, 128.8, 127.1, 125.3, 123.4, 120.9, 117.0, 110.9, 62.1, 52.8, 52.2, 43.3, 41.0, 21.1.                                                                                                                                                                                                                    |
|            | LRMS (ESI): $m/z = 635$ [M+Na].                                                                                                                                                                                                                                                                                                                                                                                                         |
|            | HRMS (ESI): Calcd for $\text{C}_{27}\text{H}_{22}\text{BrIN}_2\text{NaO}_2$ , 634.9807: Found 634.9802.                                                                                                                                                                                                                                                                                                                                 |
|            | IR (neat, $\text{cm}^{-1}$ ): 3280, 1630, 1392.                                                                                                                                                                                                                                                                                                                                                                                         |
|            | $[\alpha]_{\text{D}}^{24} +34.4$ (c 0.4, $\text{CHCl}_3$ ).                                                                                                                                                                                                                                                                                                                                                                             |

|            |                                                                                                                                                                                                                                                                                                                                                                                                                                                                     |
|------------|---------------------------------------------------------------------------------------------------------------------------------------------------------------------------------------------------------------------------------------------------------------------------------------------------------------------------------------------------------------------------------------------------------------------------------------------------------------------|
| <b>3bl</b> | Colorless oil.                                                                                                                                                                                                                                                                                                                                                                                                                                                      |
|            | $^1\text{H NMR}$ (400 MHz, $\text{CDCl}_3$ ) $\delta$ 9.70 (brs, 1H), 9.58 (brs, 1H), 7.30 (d, $J = 8.4$ Hz, 2H), 7.22 (d, $J = 8.4$ Hz, 2H), 7.19 – 7.13 (m, 4H), 7.05 (dd, $J = 2.9, 1.3$ Hz, 1H), 7.02 (ddd, $J = 2.7, 2.7, 1.2$ Hz, 1H), 6.40 – 6.34 (m, 1H), 6.32 (dd, $J = 2.5, 1.3$ Hz, 1H), 6.11 (dt, $J = 4.0, 2.5$ Hz, 1H), 4.19 (t, $J = 9.4$ Hz, 1H), 4.01 (t, $J = 9.2$ Hz, 1H), 3.94 (t, $J = 9.3$ Hz, 1H), 3.82 (t, $J = 9.3$ Hz, 2H), 2.35 (s, 3H). |
|            | $^{13}\text{C NMR}$ (100 MHz, $\text{CDCl}_3$ ): $\delta$ 187.6, 187.2, 139.9, 137.8, 137.1, 132.9, 132.7, 131.3, 129.9, 129.5, 128.9, 128.5, 127.1, 125.4, 123.5, 117.1, 110.9, 62.1, 52.9, 52.2, 43.2, 41.1, 21.1.                                                                                                                                                                                                                                                |
|            | LRMS (ESI): $m/z = 589, 591$ [M+Na].                                                                                                                                                                                                                                                                                                                                                                                                                                |
|            | HRMS (ESI): Calcd for $\text{C}_{27}\text{H}_{22}\text{ClIN}_2\text{NaO}_2$ , 591.0312: Found 591.0307.                                                                                                                                                                                                                                                                                                                                                             |
|            | IR (neat, $\text{cm}^{-1}$ ): 3274, 2924, 1634, 1394.                                                                                                                                                                                                                                                                                                                                                                                                               |
|            | $[\alpha]_{\text{D}}^{24} -31.3$ (c 0.2, $\text{CHCl}_3$ ).                                                                                                                                                                                                                                                                                                                                                                                                         |

|            |                                                                                                                                                                                                                                                                                                                                                                                                    |
|------------|----------------------------------------------------------------------------------------------------------------------------------------------------------------------------------------------------------------------------------------------------------------------------------------------------------------------------------------------------------------------------------------------------|
| <b>3bm</b> | Colorless oil.                                                                                                                                                                                                                                                                                                                                                                                     |
|            | $^1\text{H NMR}$ (400 MHz, $\text{CDCl}_3$ ) $\delta$ 9.70 (brs, 1H), 9.59 (brs, 1H), 7.63 – 7.53 (m, 4H), 7.44 (t, $J = 7.6$ Hz, 2H), 7.40 – 7.31 (m, 3H), 7.21 (d, $J = 8.0$ Hz, 2H), 7.16 (d, $J = 7.9$ Hz, 2H), 7.07 – 6.96 (m, 2H), 6.45 – 6.39 (m, 1H), 6.38 – 6.31 (m, 1H), 6.14 – 6.06 (m, 1H), 4.22 (t, $J = 9.2$ Hz, 1H), 4.12 – 4.00 (m, 2H), 3.90 (t, $J = 9.1$ Hz, 1H), 2.35 (s, 3H). |
|            | $^{13}\text{C NMR}$ (100 MHz, $\text{CDCl}_3$ ): $\delta$ 187.9, 187.5, 140.7, 140.4, 140.1, 138.1, 137.0, 132.8, 131.4, 129.8, 129.5, 128.8, 127.6, 127.5, 127.3, 127.2, 127.1, 125.3, 123.6, 117.2, 110.8, 62.0, 53.0, 52.2, 42.8, 41.9, 21.1.                                                                                                                                                   |
|            | LRMS (ESI): $m/z = 633$ [M+Na].                                                                                                                                                                                                                                                                                                                                                                    |
|            | HRMS (ESI): Calcd for $\text{C}_{33}\text{H}_{27}\text{IN}_2\text{NaO}_2$ , 633.1015: Found 633.1009.                                                                                                                                                                                                                                                                                              |
|            | IR (neat, $\text{cm}^{-1}$ ): 3273, 2924, 1628, 1395.                                                                                                                                                                                                                                                                                                                                              |
|            | $[\alpha]_{\text{D}}^{24} +7.8$ (c 0.5, $\text{CHCl}_3$ ).                                                                                                                                                                                                                                                                                                                                         |

|            |                                                                                                                                                                                                                                                                                                                                                                                                                                                      |
|------------|------------------------------------------------------------------------------------------------------------------------------------------------------------------------------------------------------------------------------------------------------------------------------------------------------------------------------------------------------------------------------------------------------------------------------------------------------|
| <b>3bn</b> | White powder.                                                                                                                                                                                                                                                                                                                                                                                                                                        |
|            | $^1\text{H}$ NMR (400 MHz, $\text{CDCl}_3$ ) $\delta$ 9.56 (brs, 1H), 9.48 (brs, 1H), 7.62 (d, $J$ = 8.4 Hz, 2H), 7.41 – 7.35 (m, 2H), 7.18 (s, 4H), 7.06 (dd, $J$ = 2.9, 1.4 Hz, 1H), 7.03 (dd, $J$ = 2.7, 2.7, 1.2 Hz, 1H), 6.36 – 6.32 (m, 1H), 6.27 (dd, $J$ = 2.5, 1.3 Hz, 1H), 6.11 (dt, $J$ = 3.9, 2.6 Hz, 1H), 4.41 (t, $J$ = 9.3 Hz, 1H), 3.97 (t, $J$ = 9.1 Hz, 1H), 3.90 (t, $J$ = 8.9 Hz, 1H), 3.84 (t, $J$ = 9.1 Hz, 1H), 2.37 (s, 3H). |
|            | $^{13}\text{C}$ NMR (100 MHz, $\text{CDCl}_3$ ): $\delta$ 187.1, 186.7, 147.0, 137.5, 137.3, 132.6, 132.5, 131.1, 130.0, 129.6, 127.8, 127.2, 125.6, 123.6, 118.7, 117.1, 111.0, 110.8, 62.2, 52.6, 51.9, 44.6, 40.2, 21.1.                                                                                                                                                                                                                          |
|            | LRMS (ESI): $m/z$ = 246 [M+Na].                                                                                                                                                                                                                                                                                                                                                                                                                      |
|            | HRMS (ESI): Calcd for $\text{C}_{28}\text{H}_{22}\text{IN}_3\text{NaO}_2$ , 582.0654: Found 582.0649.                                                                                                                                                                                                                                                                                                                                                |
|            | IR (neat, $\text{cm}^{-1}$ ): 3275, 2227, 1633, 1395, 1371.                                                                                                                                                                                                                                                                                                                                                                                          |
|            | $[\alpha]_{\text{D}}^{24}$ -29.3 (c 0.4, $\text{CHCl}_3$ ).                                                                                                                                                                                                                                                                                                                                                                                          |

|            |                                                                                                                                                                                                                                                                                                                                                                                                                                                         |
|------------|---------------------------------------------------------------------------------------------------------------------------------------------------------------------------------------------------------------------------------------------------------------------------------------------------------------------------------------------------------------------------------------------------------------------------------------------------------|
| <b>3bo</b> | White powder.                                                                                                                                                                                                                                                                                                                                                                                                                                           |
|            | $^1\text{H}$ NMR (400 MHz, $\text{CDCl}_3$ ) $\delta$ 9.57 (brs, 1H), 9.49 (brs, 1H), 8.01 (d, $J$ = 8.3 Hz, 2H), 7.38 – 7.32 (m, 2H), 7.21 – 7.14 (m, 4H), 7.07 – 7.03 (m, 1H), 7.03 – 7.00 (m, 1H), 6.37 – 6.34 (m, 1H), 6.33 (dd, $J$ = 2.6, 1.3 Hz, 1H), 6.10 (ddd, $J$ = 3.8, 2.5, 2.5 Hz, 1H), 4.37 (q, $J$ = 7.1 Hz, 2H), 4.30 (t, $J$ = 9.0 Hz, 1H), 4.06 – 3.94 (m, 2H), 3.88 (t, $J$ = 9.3 Hz, 1H), 2.36 (s, 3H), 1.39 (t, $J$ = 7.1 Hz, 3H). |
|            | $^{13}\text{C}$ NMR (100 MHz, $\text{CDCl}_3$ ): $\delta$ 187.4, 187.1, 166.3, 146.5, 137.8, 137.2, 132.6, 131.2, 130.0, 129.8, 129.5, 129.3, 127.2, 127.1, 125.3, 123.4, 117.1, 110.9, 62.1, 61.0, 52.6, 52.1, 43.5, 41.3, 21.1, 14.3.                                                                                                                                                                                                                 |
|            | LRMS (ESI): $m/z$ = 629 [M+Na].                                                                                                                                                                                                                                                                                                                                                                                                                         |
|            | HRMS (ESI): Calcd for $\text{C}_{30}\text{H}_{27}\text{IN}_2\text{NaO}_4$ , 629.0913: Found 629.0908.                                                                                                                                                                                                                                                                                                                                                   |
|            | IR (neat, $\text{cm}^{-1}$ ): 3278, 1632, 1278, 1108.                                                                                                                                                                                                                                                                                                                                                                                                   |
|            | $[\alpha]_{\text{D}}^{24}$ +7.7 (c 0.5, $\text{CHCl}_3$ ).                                                                                                                                                                                                                                                                                                                                                                                              |

|                                                                                   |                                                                                                                                                                                                                                                                                                                                                                                                                                                                                                                             |
|-----------------------------------------------------------------------------------|-----------------------------------------------------------------------------------------------------------------------------------------------------------------------------------------------------------------------------------------------------------------------------------------------------------------------------------------------------------------------------------------------------------------------------------------------------------------------------------------------------------------------------|
| <b>3bp</b>                                                                        | White powder.                                                                                                                                                                                                                                                                                                                                                                                                                                                                                                               |
| 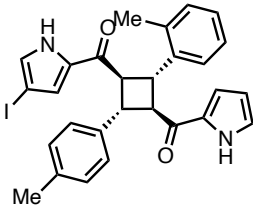 | $^1\text{H}$ NMR (400 MHz, $\text{CDCl}_3$ ) $\delta$ 9.40 (brs, 1H), 9.36 (brs, 1H), 7.66 – 7.58 (m, 1H), 7.37 – 7.30 (m, 1H), 7.22 (d, $J$ = 8.1 Hz, 2H), 7.20 – 7.13 (m, 3H), 7.09 (d, $J$ = 7.5 Hz, 1H), 7.00 (dd, $J$ = 2.9, 1.4 Hz, 1H), 6.98 (ddd, $J$ = 2.7, 2.7, 1.3 Hz, 1H), 6.35 – 6.30 (m, 1H), 6.28 (dd, $J$ = 2.5, 1.4 Hz, 1H), 6.07 (dt, $J$ = 3.9, 2.5 Hz, 1H), 4.33 (t, $J$ = 9.4 Hz, 1H), 4.12 (t, $J$ = 9.4 Hz, 1H), 4.01 (t, $J$ = 9.4 Hz, 1H), 3.89 (t, $J$ = 9.4 Hz, 1H), 2.35 (s, 3H), 2.11 (s, 3H). |
|                                                                                   | $^{13}\text{C}$ NMR (100 MHz, $\text{CDCl}_3$ ): $\delta$ 188.0, 187.5, 139.3, 138.4, 137.0, 136.8, 132.7, 131.4, 130.5, 129.42, 129.41, 127.12 (2C), 127.07, 126.6, 126.0, 124.9, 123.1, 116.7, 110.8, 62.0, 53.3, 52.7, 41.8, 38.8, 21.1, 19.9.                                                                                                                                                                                                                                                                           |
|                                                                                   | LRMS (ESI): $m/z$ = 571 [M+Na].                                                                                                                                                                                                                                                                                                                                                                                                                                                                                             |
|                                                                                   | HRMS (ESI): Calcd for $\text{C}_{28}\text{H}_{25}\text{N}_2\text{NaO}_2$ , 571.0858: Found 571.0853.                                                                                                                                                                                                                                                                                                                                                                                                                        |
|                                                                                   | IR (neat, $\text{cm}^{-1}$ ): 3274, 2922, 2852, 1626, 1394.                                                                                                                                                                                                                                                                                                                                                                                                                                                                 |
|                                                                                   | $[\alpha]_{\text{D}}^{24}$ -25.2 (c 0.2, $\text{CHCl}_3$ ).                                                                                                                                                                                                                                                                                                                                                                                                                                                                 |

|                                                                                     |                                                                                                                                                                                                                                                                                                             |
|-------------------------------------------------------------------------------------|-------------------------------------------------------------------------------------------------------------------------------------------------------------------------------------------------------------------------------------------------------------------------------------------------------------|
| <b>3aq</b>                                                                          | White powder.                                                                                                                                                                                                                                                                                               |
| 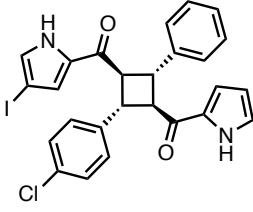 | $^1\text{H}$ NMR (400 MHz, $\text{CDCl}_3$ ). $\delta$ 9.90 (s, 1H), 9.72 (s, 1H), 7.45 – 7.16 (m, 9H), 7.12 – 6.97 (m, 2H), 6.40 – 6.35 (m, 1H), 6.35 – 6.30 (m, 1H), 6.13 – 6.07 (m, 1H), 4.18 (t, $J$ = 9.4 Hz, 1H), 4.09 (t, $J$ = 8.6 Hz, 1H), 3.97 (t, $J$ = 9.4 Hz, 1H), 3.86 (t, $J$ = 9.4 Hz, 1H). |
|                                                                                     | $^{13}\text{C}$ NMR (100 MHz, $\text{CDCl}_3$ ): $\delta$ 187.6, 187.2, 140.9, 139.8, 133.0, 132.7, 131.3, 130.3, 129.0, 128.9, 128.5, 127.5, 127.2, 125.7, 123.7, 117.3, 110.9, 62.1, 52.7, 52.2, 43.2, 41.5.                                                                                              |
|                                                                                     | LRMS (ESI): $m/z$ = 575, 577 [M+Na].                                                                                                                                                                                                                                                                        |
|                                                                                     | HRMS (ESI): Calcd for $\text{C}_{26}\text{H}_{20}\text{ClIN}_2\text{NaO}_2$ , 577.0156: Found 577.0123.                                                                                                                                                                                                     |
|                                                                                     | IR (neat, $\text{cm}^{-1}$ ): 3279, 2918, 1633, 1135.                                                                                                                                                                                                                                                       |
|                                                                                     | $[\alpha]_{\text{D}}^{24}$ -25.2 (c 0.2, $\text{CHCl}_3$ ).                                                                                                                                                                                                                                                 |

|            |                                                                                                                                                                                                                                                                                                                                                                                   |
|------------|-----------------------------------------------------------------------------------------------------------------------------------------------------------------------------------------------------------------------------------------------------------------------------------------------------------------------------------------------------------------------------------|
| <b>3jr</b> | White powder.                                                                                                                                                                                                                                                                                                                                                                     |
|            | <sup>1</sup> H NMR (400 MHz, CDCl <sub>3</sub> ) δ 7.33 – 7.21 (m, 6H), 7.22 – 7.13 (m, 5H), 7.01 – 6.95 (m, 2H), 6.90 (d, <i>J</i> = 8.6 Hz, 2H), 6.43 – 6.38 (m, 1H), 6.38 – 6.32 (m, 1H), 6.13 – 6.05 (m, 1H), 4.13 (t, <i>J</i> = 9.3 Hz, 1H), 4.08 (t, <i>J</i> = 9.3 Hz, 1H), 4.01 (t, <i>J</i> = 9.2 Hz, 1H), 3.91 (t, <i>J</i> = 9.3 Hz, 1H), 3.80 (s, 3H), 2.36 (s, 3H). |
|            | <sup>13</sup> C NMR (100 MHz, CDCl <sub>3</sub> ): δ 188.13, 188.08, 158.7, 138.7, 136.8, 134.1, 133.8, 131.8, 131.5, 129.4, 128.64, 128.55, 127.3, 126.7, 126.2, 125.0(2C), 121.5, 117.0, 114.2, 114.1, 110.7, 55.3, 53.9, 52.5, 42.2, 42.0, 21.1.                                                                                                                               |
|            | LRMS (ESI): <i>m/z</i> = 537 [M+Na].                                                                                                                                                                                                                                                                                                                                              |
|            | HRMS (ESI): Calcd for C <sub>34</sub> H <sub>30</sub> N <sub>2</sub> NaO <sub>3</sub> , 537.2154: Found 537.2125.                                                                                                                                                                                                                                                                 |
|            | IR (neat, cm <sup>-1</sup> ): 3274, 1625, 1513, 1399.                                                                                                                                                                                                                                                                                                                             |
|            | [α] <sub>D</sub> <sup>24</sup> +4.5 (c 0.1, CHCl <sub>3</sub> ).                                                                                                                                                                                                                                                                                                                  |

|            |                                                                                                                                                                                                                                                                                                                                                                                                                                                              |
|------------|--------------------------------------------------------------------------------------------------------------------------------------------------------------------------------------------------------------------------------------------------------------------------------------------------------------------------------------------------------------------------------------------------------------------------------------------------------------|
| <b>3cj</b> | White powder.                                                                                                                                                                                                                                                                                                                                                                                                                                                |
|            | <sup>1</sup> H NMR (400 MHz, CDCl <sub>3</sub> ) δ 9.60 (brs, 1H), 9.51 (brs, 1H), 7.25 – 7.21 (m, 2H), 7.19 (d, <i>J</i> = 8.1 Hz, 2H), 7.14 (d, <i>J</i> = 7.9 Hz, 2H), 7.01 – 6.98 (m, 1H), 6.98 – 6.95 (m, 1H), 6.91 – 6.85 (m, 2H), 6.38 – 6.33 (m, 1H), 6.28 – 6.24 (m, 1H), 6.12 – 6.05 (m, 1H), 4.12 (t, <i>J</i> = 9.3, 9.3 Hz, 1H), 4.03 (t, <i>J</i> = 9.3, 9.3 Hz, 1H), 3.94 (t, <i>J</i> = 9.3, 9.3 Hz, 1H), 3.87 – 3.77 (m, 4H), 2.34 (s, 3H). |
|            | <sup>13</sup> C NMR (100 MHz, CDCl <sub>3</sub> ): δ 188.0, 187.9, 158.7, 138.3, 136.8, 133.4, 131.4, 131.3, 129.4, 128.3, 127.1, 125.2, 124.8, 118.3, 117.1, 114.2, 110.8, 98.0, 55.3, 53.1, 52.7, 42.4, 41.9, 21.1.                                                                                                                                                                                                                                        |
|            | LRMS (ESI): <i>m/z</i> = 537, 539 [M+Na].                                                                                                                                                                                                                                                                                                                                                                                                                    |
|            | HRMS (ESI): Calcd for C <sub>28</sub> H <sub>25</sub> BrN <sub>2</sub> NaO <sub>3</sub> , 539.0946: Found 539.0941.                                                                                                                                                                                                                                                                                                                                          |
|            | IR (neat, cm <sup>-1</sup> ): 3274, 1632, 1514, 1396.                                                                                                                                                                                                                                                                                                                                                                                                        |
|            | [α] <sub>D</sub> <sup>24</sup> +24.9(c 0.2, CHCl <sub>3</sub> ).                                                                                                                                                                                                                                                                                                                                                                                             |

|            |                                                                                                                                                                                                                                                                                                                                                                                                        |
|------------|--------------------------------------------------------------------------------------------------------------------------------------------------------------------------------------------------------------------------------------------------------------------------------------------------------------------------------------------------------------------------------------------------------|
| <b>3cl</b> | White powder.                                                                                                                                                                                                                                                                                                                                                                                          |
|            | $^1\text{H NMR}$ (400 MHz, $\text{CDCl}_3$ ). $\delta$ 9.63 (s, 1H), 9.54 (s, 1H), 7.30 (d, $J = 8.5$ Hz, 2H), 7.22 (d, $J = 8.5$ Hz, 2H), 7.20 – 7.13 (m, 4H), 7.03 – 7.00 (m, 1H), 7.00 – 6.97 (m, 1H), 6.38 – 6.33 (m, 1H), 6.28 – 6.24 (m, 1H), 6.13 – 6.07 (m, 1H), 4.19 (t, $J = 9.4$ Hz, 1H), 4.02 (t, $J = 9.3$ Hz, 1H), 3.93 (t, $J = 9.3$ Hz, 1H), 3.82 (t, $J = 9.4$ Hz, 1H), 2.35 (s, 3H). |
|            | $^{13}\text{C NMR}$ (100 MHz, $\text{CDCl}_3$ ) $\delta$ 187.53, 187.48, 139.9, 137.8, 137.2, 132.9, 131.3, 131.2, 129.5, 128.9, 128.5, 127.1, 125.4, 125.0, 118.3, 117.1, 110.9, 98.1, 52.7, 52.4, 43.2, 41.1, 21.1.                                                                                                                                                                                  |
|            | LRMS (ESI): $m/z = 539, 541, 543$ [M+Na].                                                                                                                                                                                                                                                                                                                                                              |
|            | HRMS (ESI): Calcd for $\text{C}_{27}\text{H}_{22}\text{BrClN}_2\text{NaO}_2$ , 543.0451: Found 543.0445.                                                                                                                                                                                                                                                                                               |
|            | IR (neat, $\text{cm}^{-1}$ ): 3271, 1629, 1385.                                                                                                                                                                                                                                                                                                                                                        |
|            | $[\alpha]_{\text{D}}^{24} -10.3$ (c 0.5, $\text{CHCl}_3$ ).                                                                                                                                                                                                                                                                                                                                            |

|            |                                                                                                                                                                                                                                                                                                                                                                                                                                                                                               |
|------------|-----------------------------------------------------------------------------------------------------------------------------------------------------------------------------------------------------------------------------------------------------------------------------------------------------------------------------------------------------------------------------------------------------------------------------------------------------------------------------------------------|
| <b>3cm</b> | White powder.                                                                                                                                                                                                                                                                                                                                                                                                                                                                                 |
|            | $^1\text{H NMR}$ (400 MHz, $\text{CDCl}_3$ ) $\delta$ 9.37 (brs, 2H), 7.63 – 7.54 (m, 4H), 7.48 – 7.41 (m, 2H), 7.41 – 7.31 (m, 3H), 7.22 (d, $J = 8.1$ Hz, 2H), 7.16 (d, $J = 7.9$ Hz, 2H), 7.00 (ddd, $J = 2.8, 2.8, 1.2$ Hz, 1H), 6.97 (dd, $J = 3.0, 1.4$ Hz, 1H), 6.42 – 6.37 (m, 1H), 6.28 (dd, $J = 2.6, 1.4$ Hz, 1H), 6.10 (dt, $J = 3.9, 2.5$ Hz, 1H), 4.23 (t, $J = 9.3$ Hz, 1H), 4.09 (t, $J = 9.3$ Hz, 1H), 4.02 (t, $J = 9.3$ Hz, 1H), 3.90 (t, $J = 9.3$ Hz, 1H), 2.35 (s, 3H). |
|            | $^{13}\text{C NMR}$ (100 MHz, $\text{CDCl}_3$ ): $\delta$ 187.93, 187.85, 140.7, 140.4, 140.1, 138.1, 137.0, 131.4, 131.3, 129.5, 128.8, 127.6, 127.5, 127.3, 127.1, 127.0, 125.4, 125.1, 118.5, 117.2, 110.8, 98.1, 52.8, 52.3, 42.9, 41.9, 21.1.                                                                                                                                                                                                                                            |
|            | LRMS (ESI): $m/z = 583, 585$ [M+Na].                                                                                                                                                                                                                                                                                                                                                                                                                                                          |
|            | HRMS (ESI): Calcd for $\text{C}_{33}\text{H}_{27}\text{BrN}_2\text{NaO}_2$ , 585.1154: Found 585.1148.                                                                                                                                                                                                                                                                                                                                                                                        |
|            | IR (neat, $\text{cm}^{-1}$ ): 3275, 1627, 1395.                                                                                                                                                                                                                                                                                                                                                                                                                                               |
|            | $[\alpha]_{\text{D}}^{24} -1.3$ (c 0.2, $\text{CHCl}_3$ ).                                                                                                                                                                                                                                                                                                                                                                                                                                    |



### 3-2. Synthesis of 2

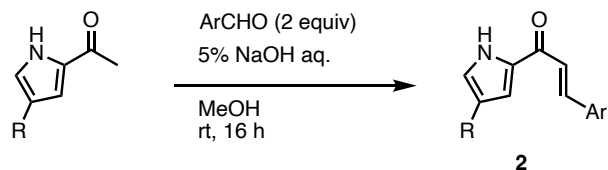

In round bottom flask, 2-acetylpyrrole (500 mg, 4.58 mmol) and aldehyde (9.16 mmol) were mixed in methanol (20 mL). 5% NaOH aq. was added to the solution and the mixture was stirred overnight at room temperature. Then, the precipitate was filtered and washed with water. The solid was recrystallized from ethanol to give **2**.

Data of new products.

|           |                                                                                                                                                                                                                                                                                                                                                                                                                                                                                                                                                     |
|-----------|-----------------------------------------------------------------------------------------------------------------------------------------------------------------------------------------------------------------------------------------------------------------------------------------------------------------------------------------------------------------------------------------------------------------------------------------------------------------------------------------------------------------------------------------------------|
| <b>2b</b> | Pale yellow powder.                                                                                                                                                                                                                                                                                                                                                                                                                                                                                                                                 |
|           | $^1\text{H NMR}$ (400 MHz, $\text{CDCl}_3$ ) $\delta$ 9.45 (brs, 1H), 7.81 (d, $J = 15.6$ Hz, 1H), 7.53 (d, $J = 8.3$ Hz, 2H), 7.25 – 7.18 (m, 3H), 7.15 – 7.13 (m, 1H), 7.13 – 7.11 (m, 1H), 2.40 (s, 3H).<br>$^{13}\text{C NMR}$ (101 MHz, $\text{CDCl}_3$ ) $\delta$ 178.2, 143.4, 141.1, 134.5, 131.9, 129.7, 129.5, 128.5, 122.2, 120.1, 62.3, 21.5.<br>LRMS (ESI): $m/z = 360$ [M+Na].<br>HRMS (ESI): Calcd for $\text{C}_{14}\text{H}_{12}\text{INNaO}$ , 359.9861; Found 359.9856.<br>IR (neat, $\text{cm}^{-1}$ ): 3216, 1649, 1579.       |
| <b>2c</b> | Pale yellow powder.                                                                                                                                                                                                                                                                                                                                                                                                                                                                                                                                 |
|           | $^1\text{H NMR}$ (400 MHz, $\text{CDCl}_3$ ) $\delta$ 9.43 (brs, 1H), 7.82 (d, $J = 15.7$ Hz, 1H), 7.53 (d, $J = 8.1$ Hz, 2H), 7.25 – 7.18 (m, 4H), 7.08 – 7.06 (m, 1H), 7.05 – 7.03 (m, 1H), 2.40 (s, 3H).<br>$^{13}\text{C NMR}$ (101 MHz, $\text{CDCl}_3$ ) $\delta$ 178.5, 143.5, 141.2, 133.0, 131.9, 129.7, 128.5, 124.6, 120.1, 117.3, 98.3, 21.5.<br>LRMS (ESI): $m/z = 312, 314$ [M+Na].<br>HRMS (ESI): Calcd for $\text{C}_{14}\text{H}_{12}\text{BrNNaO}$ , 312.0000; Found 311.9994.<br>IR (neat, $\text{cm}^{-1}$ ): 3224, 1649, 1579. |

|                                                                                   |                                                                                                                                                                                                                    |
|-----------------------------------------------------------------------------------|--------------------------------------------------------------------------------------------------------------------------------------------------------------------------------------------------------------------|
| <b>2d</b>                                                                         | Pale yellow powder.                                                                                                                                                                                                |
| 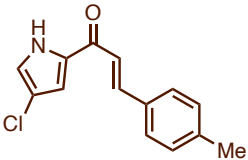 | <sup>1</sup> H NMR (400 MHz, CDCl <sub>3</sub> ) δ 9.59 (brs, 1H), 7.82 (d, <i>J</i> = 15.7 Hz, 1H), 7.53 (d, <i>J</i> = 8.2 Hz, 2H), 7.25 – 7.17 (m, 3H), 7.06 – 7.01 (m, 1H), 6.99 – 6.95 (m, 1H), 2.40 (s, 3H). |
|                                                                                   | <sup>13</sup> C NMR (101 MHz, CDCl <sub>3</sub> ) δ 178.6, 143.5, 141.1, 132.1, 131.9, 129.7, 128.5, 122.1, 120.0, 114.7, 114.5, 21.5.                                                                             |
|                                                                                   | LRMS (ESI): <i>m/z</i> = 268, 270 [M+Na].                                                                                                                                                                          |
|                                                                                   | HRMS (ESI): Calcd for C <sub>14</sub> H <sub>12</sub> ClNNaO, 268.0505; Found 268.0500.                                                                                                                            |
|                                                                                   | IR (neat, cm <sup>-1</sup> ): 3244, 1649, 1574.                                                                                                                                                                    |

|                                                                                   |                                                                                                                                                                                                                                                                                |
|-----------------------------------------------------------------------------------|--------------------------------------------------------------------------------------------------------------------------------------------------------------------------------------------------------------------------------------------------------------------------------|
| <b>2e</b>                                                                         | Colorless oil.                                                                                                                                                                                                                                                                 |
| 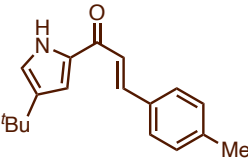 | <sup>1</sup> H NMR (400 MHz, CDCl <sub>3</sub> ) δ 9.23 (brs, 1H), 7.78 (d, <i>J</i> = 15.7 Hz, 1H), 7.55 (d, <i>J</i> = 8.1 Hz, 2H), 7.31 (d, <i>J</i> = 15.7 Hz, 1H), 7.22 (d, <i>J</i> = 7.9 Hz, 2H), 6.99 – 6.95 (m, 1H), 6.95 – 6.91 (m, 1H), 2.39 (s, 3H), 1.30 (s, 9H). |
|                                                                                   | <sup>13</sup> C NMR (101 MHz, CDCl <sub>3</sub> ) δ 178.7, 142.0, 140.5, 138.1, 132.8, 132.4, 129.6, 128.3, 121.04, 120.97, 113.4, 31.7, 30.6, 21.5.                                                                                                                           |
|                                                                                   | LRMS (ESI): <i>m/z</i> = 290 [M+Na].                                                                                                                                                                                                                                           |
|                                                                                   | HRMS (ESI): Calcd for C <sub>18</sub> H <sub>21</sub> NO, 290.1521; Found 290.1515.                                                                                                                                                                                            |
|                                                                                   | IR (neat, cm <sup>-1</sup> ): 3441, 1645, 1579.                                                                                                                                                                                                                                |

|                                                                                     |                                                                                                                                                                                                                                                                                                                                             |
|-------------------------------------------------------------------------------------|---------------------------------------------------------------------------------------------------------------------------------------------------------------------------------------------------------------------------------------------------------------------------------------------------------------------------------------------|
| <b>2f</b>                                                                           | Pale yellow powder.                                                                                                                                                                                                                                                                                                                         |
| 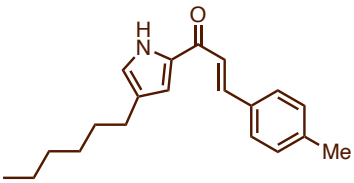 | <sup>1</sup> H NMR (400 MHz, CDCl <sub>3</sub> ) δ 9.34 (brs, 1H), 7.78 (d, <i>J</i> = 15.7 Hz, 1H), 7.54 (d, <i>J</i> = 8.2 Hz, 2H), 7.29 (d, <i>J</i> = 15.7 Hz, 1H), 7.22 (d, <i>J</i> = 7.9 Hz, 2H), 6.93 – 6.85 (m, 2H), 2.50 (t, <i>J</i> = 7.7 Hz, 2H), 2.39 (s, 3H), 1.67 – 1.53 (m, 2H), 1.42 – 1.22 (m, 6H), 0.95 – 0.85 (m, 3H). |
|                                                                                     | <sup>13</sup> C NMR (101 MHz, CDCl <sub>3</sub> ) δ 178.6, 141.9, 140.5, 132.9, 132.4, 129.6, 128.3, 127.4, 123.1, 121.0, 115.8, 31.7, 31.0, 29.0, 26.7, 22.6, 21.5, 14.1.                                                                                                                                                                  |
|                                                                                     | LRMS (ESI): <i>m/z</i> = 318 [M+Na].                                                                                                                                                                                                                                                                                                        |
|                                                                                     | HRMS (ESI): Calcd for C <sub>20</sub> H <sub>25</sub> NNaO, 318.1834; Found 318.1828.                                                                                                                                                                                                                                                       |
|                                                                                     | IR (neat, cm <sup>-1</sup> ): 3242, 1649, 1580.                                                                                                                                                                                                                                                                                             |

|           |                                                                                                                                                                                                                                                                                                      |
|-----------|------------------------------------------------------------------------------------------------------------------------------------------------------------------------------------------------------------------------------------------------------------------------------------------------------|
| <b>2g</b> | Pale yellow powder.                                                                                                                                                                                                                                                                                  |
|           | <sup>1</sup> H NMR (400 MHz, CDCl <sub>3</sub> ) δ 9.47 (brs, 1H), 7.80 (d, <i>J</i> = 15.7 Hz, 1H), 7.52 (d, <i>J</i> = 8.2 Hz, 2H), 7.27 – 7.20 (m, 3H), 7.19 – 7.14 (m, 1H), 7.10 – 7.04 (m, 1H), 2.44 – 2.35 (m, 5H), 1.64 – 1.53 (m, 2H), 1.53 – 1.41 (m, 2H), 0.95 (t, <i>J</i> = 7.2 Hz, 3H). |
|           | <sup>13</sup> C NMR (101 MHz, CDCl <sub>3</sub> ) δ 178.8, 142.9, 140.9, 132.5, 132.1, 129.7, 128.4, 127.6, 120.5, 118.3, 108.0, 89.5, 73.6, 30.9, 22.0, 21.5, 19.1, 13.7.                                                                                                                           |
|           | LRMS (ESI): <i>m/z</i> = 314 [M+Na].                                                                                                                                                                                                                                                                 |
|           | HRMS (ESI): Calcd for C <sub>20</sub> H <sub>21</sub> NNaO, 314.1521; Found 314.1515.                                                                                                                                                                                                                |
|           | IR (neat, cm <sup>-1</sup> ): 3250, 2344, 1647, 1577.                                                                                                                                                                                                                                                |

|           |                                                                                                                                                                                                                                  |
|-----------|----------------------------------------------------------------------------------------------------------------------------------------------------------------------------------------------------------------------------------|
| <b>2h</b> | Pale yellow powder.                                                                                                                                                                                                              |
|           | <sup>1</sup> H NMR (400 MHz, CDCl <sub>3</sub> ) δ 9.45 (brs, 1H), 7.79 (d, <i>J</i> = 15.7 Hz, 1H), 7.52 (d, <i>J</i> = 8.3 Hz, 2H), 7.28 – 7.19 (m, 3H), 7.19 – 7.13 (m, 1H), 7.12 – 7.06 (m, 1H), 2.39 (s, 3H), 1.31 (s, 9H). |
|           | <sup>13</sup> C NMR (101 MHz, CDCl <sub>3</sub> ) δ 178.8, 142.8, 140.9, 132.5, 132.1, 129.7, 128.4, 127.5, 120.5, 118.5, 107.9, 97.6, 72.1, 31.1, 28.0, 21.5.                                                                   |
|           | LRMS (ESI): <i>m/z</i> = 314 [M+Na].                                                                                                                                                                                             |
|           | HRMS (ESI): Calcd for C <sub>20</sub> H <sub>21</sub> NNaO, 314.1521; Found 314.1515.                                                                                                                                            |
|           | IR (neat, cm <sup>-1</sup> ): 3249, 2358, 1645, 1575.                                                                                                                                                                            |

|                                                                                     |                                                                                                                                                                                                                                                                                                                                  |
|-------------------------------------------------------------------------------------|----------------------------------------------------------------------------------------------------------------------------------------------------------------------------------------------------------------------------------------------------------------------------------------------------------------------------------|
| <b>2i</b>                                                                           | Pale yellow powder.                                                                                                                                                                                                                                                                                                              |
| 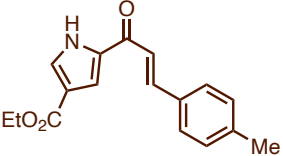   | <sup>1</sup> H NMR (400 MHz, CDCl <sub>3</sub> ) δ 9.88 (s, 1H), 7.84 (d, <i>J</i> = 15.6 Hz, 1H), 7.69 – 7.63 (m, 1H), 7.55 (d, <i>J</i> = 8.2 Hz, 1H), 7.49 – 7.44 (m, 1H), 7.32 (d, <i>J</i> = 15.7 Hz, 1H), 7.24 (d, <i>J</i> = 7.9 Hz, 2H), 4.34 (q, <i>J</i> = 7.1 Hz, 2H), 2.40 (s, 3H), 1.38 (t, <i>J</i> = 7.1 Hz, 3H). |
|                                                                                     | <sup>13</sup> C NMR (101 MHz, CDCl <sub>3</sub> ) δ 179.4, 163.9, 143.6, 141.2, 133.5, 131.9, 129.7, 128.5, 128.4, 120.0, 118.7, 116.1, 60.3, 21.6, 14.4.                                                                                                                                                                        |
|                                                                                     | LRMS (ESI): <i>m/z</i> = 306 [M+Na].                                                                                                                                                                                                                                                                                             |
|                                                                                     | HRMS (ESI): Calcd for C <sub>17</sub> H <sub>17</sub> NNaO <sub>3</sub> , 306.1106; Found 306.1101.                                                                                                                                                                                                                              |
|                                                                                     | IR (neat, cm <sup>-1</sup> ): 3237, 1709, 1648, 1207.                                                                                                                                                                                                                                                                            |
| <b>2m</b>                                                                           | Pale yellow powder.                                                                                                                                                                                                                                                                                                              |
|   | <sup>1</sup> H NMR (400 MHz, CDCl <sub>3</sub> ) δ 9.72 (brs, 1H), 7.87 (d, <i>J</i> = 15.7 Hz, 1H), 7.75 – 7.68 (m, 2H), 7.68 – 7.60 (m, 4H), 7.50 – 7.43 (m, 2H), 7.43 – 7.35 (m, 2H), 7.16 – 7.07 (m, 2H), 6.37 (dt, <i>J</i> = 3.8, 2.5 Hz, 1H).                                                                             |
|                                                                                     | <sup>13</sup> C NMR (101 MHz, CDCl <sub>3</sub> ) δ 178.8, 143.0, 141.8, 140.2, 134.0, 133.2, 128.9, 128.8, 127.8, 127.5, 127.0, 125.2, 121.7, 116.2, 111.0.                                                                                                                                                                     |
|                                                                                     | LRMS (ESI): <i>m/z</i> = 296 [M+Na].                                                                                                                                                                                                                                                                                             |
|                                                                                     | HRMS (ESI): Calcd for C <sub>19</sub> H <sub>15</sub> NNaO, 296.1051; Found 296.1046.                                                                                                                                                                                                                                            |
|                                                                                     | IR (neat, cm <sup>-1</sup> ): 3260, 1649, 1585.                                                                                                                                                                                                                                                                                  |
| <b>2n</b>                                                                           | Pale yellow powder.                                                                                                                                                                                                                                                                                                              |
|  | <sup>1</sup> H NMR (400 MHz, CDCl <sub>3</sub> ) δ 9.81 (brs, 1H), 7.79 (d, <i>J</i> = 15.7 Hz, 1H), 7.75 – 7.67 (m, 4H), 7.41 (d, <i>J</i> = 15.7 Hz, 1H), 7.17 (td, <i>J</i> = 2.7, 1.3 Hz, 1H), 7.14 – 7.07 (m, 1H), 6.39 (dt, <i>J</i> = 4.0, 2.5 Hz, 1H).                                                                   |
|                                                                                     | <sup>13</sup> C NMR (101 MHz, CDCl <sub>3</sub> ) δ 177.8, 139.7, 139.3, 132.9, 132.6, 128.6, 126.1, 125.1, 118.5, 116.9, 113.1, 111.3.                                                                                                                                                                                          |
|                                                                                     | LRMS (ESI): <i>m/z</i> = 245 [M+Na].                                                                                                                                                                                                                                                                                             |
|                                                                                     | HRMS (ESI): Calcd for C <sub>14</sub> H <sub>10</sub> N <sub>2</sub> NaO, 245.0691; Found 245.0685.                                                                                                                                                                                                                              |
|                                                                                     | IR (neat, cm <sup>-1</sup> ): 3244, 2223, 1645, 1590.                                                                                                                                                                                                                                                                            |

|                                                                                     |                                                                                                                                                                                                                                                                                                                                                                                                                                                                                                                                                                                                                                                                                                                                                                                                                                                                                                                   |
|-------------------------------------------------------------------------------------|-------------------------------------------------------------------------------------------------------------------------------------------------------------------------------------------------------------------------------------------------------------------------------------------------------------------------------------------------------------------------------------------------------------------------------------------------------------------------------------------------------------------------------------------------------------------------------------------------------------------------------------------------------------------------------------------------------------------------------------------------------------------------------------------------------------------------------------------------------------------------------------------------------------------|
| <b>2o</b>                                                                           | Pale yellow powder.                                                                                                                                                                                                                                                                                                                                                                                                                                                                                                                                                                                                                                                                                                                                                                                                                                                                                               |
| 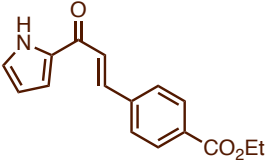   | <p><math>^1\text{H}</math> NMR (400 MHz, <math>\text{CDCl}_3</math>) <math>\delta</math> 9.86 (brs, 1H), 8.08 (d, <math>J = 8.4</math> Hz, 2H), 7.84 (d, <math>J = 15.7</math> Hz, 1H), 7.69 (d, <math>J = 8.4</math> Hz, 2H), 7.42 (d, <math>J = 15.7</math> Hz, 1H), 7.15 (td, <math>J = 2.7, 1.3</math> Hz, 1H), 7.14 – 7.08 (m, 1H), 6.38 (dt, <math>J = 3.9, 2.5</math> Hz, 1H), 4.40 (q, <math>J = 7.1</math> Hz, 2H), 1.42 (t, <math>J = 7.1</math> Hz, 3H).</p> <p><math>^{13}\text{C}</math> NMR (101 MHz, <math>\text{CDCl}_3</math>) <math>\delta</math> 178.3, 166.0, 140.8, 139.1, 133.0, 131.6, 130.0, 128.1, 125.8, 124.0, 116.7, 111.2, 61.2, 14.3.</p> <p>LRMS (ESI): <math>m/z = 292</math> [M+Na].</p> <p>HRMS (ESI): Calcd for <math>\text{C}_{16}\text{H}_{15}\text{NNaO}</math>, 292.0950; Found 292.0944.</p> <p>IR (neat, <math>\text{cm}^{-1}</math>): 3253, 1707, 1645, 1587, 1284.</p> |
| <b>2p</b>                                                                           | Pale yellow powder.                                                                                                                                                                                                                                                                                                                                                                                                                                                                                                                                                                                                                                                                                                                                                                                                                                                                                               |
|  | <p><math>^1\text{H}</math> NMR (400 MHz, <math>\text{CDCl}_3</math>) <math>\delta</math> 9.56 (brs, 1H), 8.11 (d, <math>J = 15.6</math> Hz, 1H), 7.73 – 7.66 (m, 1H), 7.33 – 7.20 (m, 4H), 7.13 – 7.09 (m, 1H), 7.09 – 7.04 (m, 1H), 6.39 – 6.32 (m, 1H), 2.49 (s, 3H).</p> <p><math>^{13}\text{C}</math> NMR (101 MHz, <math>\text{CDCl}_3</math>) <math>\delta</math> 178.9, 139.9, 138.2, 134.0, 133.2, 130.8, 130.0, 126.3, 126.3, 125.0, 123.0, 116.1, 111.0, 19.9.</p> <p>LRMS (ESI): <math>m/z = 234</math> [M+Na].</p> <p>HRMS (ESI): Calcd for <math>\text{C}_{14}\text{H}_{13}\text{NNaO}</math>, 234.0895; Found 234.0889.</p> <p>IR (neat, <math>\text{cm}^{-1}</math>): 3410, 1643, 1586, 1403.</p>                                                                                                                                                                                                  |

|                                                                                   |                                                                                                                                                                                                                             |
|-----------------------------------------------------------------------------------|-----------------------------------------------------------------------------------------------------------------------------------------------------------------------------------------------------------------------------|
| <b>2q</b>                                                                         | Pale yellow powder.                                                                                                                                                                                                         |
| 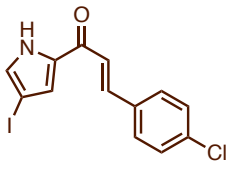 | <sup>1</sup> H NMR (400 MHz, CDCl <sub>3</sub> ) δ 9.53 (s, 1H), 7.77 (d, <i>J</i> = 15.7 Hz, 1H), 7.56 (d, <i>J</i> = 8.5 Hz, 2H), 7.40 (d, <i>J</i> = 8.5 Hz, 2H), 7.23 (d, <i>J</i> = 15.7 Hz, 1H), 7.17 – 7.11 (m, 2H). |
|                                                                                   | <sup>13</sup> C NMR (101 MHz, CDCl <sub>3</sub> ) δ 177.7, 141.9, 136.5, 134.4, 133.2, 129.6, 129.6, 129.3, 122.4, 121.6, 62.4.                                                                                             |
|                                                                                   | LRMS (ESI): <i>m/z</i> = 354, 356 [M+Na].                                                                                                                                                                                   |
|                                                                                   | HRMS (ESI): Calcd for C <sub>13</sub> H <sub>9</sub> ClINNaO, 379.9315; Found 379.9310.                                                                                                                                     |
|                                                                                   | IR (neat, cm <sup>-1</sup> ): 3224, 1649, 1581.                                                                                                                                                                             |

|                                                                                   |                                                                                                                                                                                                     |
|-----------------------------------------------------------------------------------|-----------------------------------------------------------------------------------------------------------------------------------------------------------------------------------------------------|
| <b>2r</b>                                                                         | Pale yellow powder.                                                                                                                                                                                 |
| 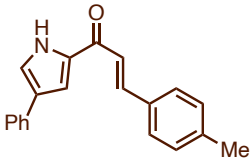 | <sup>1</sup> H NMR (400 MHz, CDCl <sub>3</sub> ) δ 9.60 (brs, 1H), 7.84 (d, <i>J</i> = 15.6 Hz, 1H), 7.57 (dd, <i>J</i> = 7.8, 1.2 Hz, 1H), 7.44 – 7.31 (m, 4H), 7.28 – 7.21 (m, 2H), 2.40 (s, 3H). |
|                                                                                   | <sup>13</sup> C NMR (101 MHz, CDCl <sub>3</sub> ) δ 179.0, 142.7, 140.9, 134.3, 133.8, 132.2, 129.7, 128.8, 128.4, 127.4, 126.5, 125.3, 121.7, 120.6, 112.8, 21.5.                                  |
|                                                                                   | LRMS (ESI): <i>m/z</i> = 310 [M+Na].                                                                                                                                                                |
|                                                                                   | HRMS (ESI): Calcd for C <sub>20</sub> H <sub>17</sub> NNaO, 310.1208; Found 310.1202.                                                                                                               |
|                                                                                   | IR (neat, cm <sup>-1</sup> ): 3224, 1647, 1583.                                                                                                                                                     |

## 4. Mechanistic study

### 4-1. UV-Vis spectra

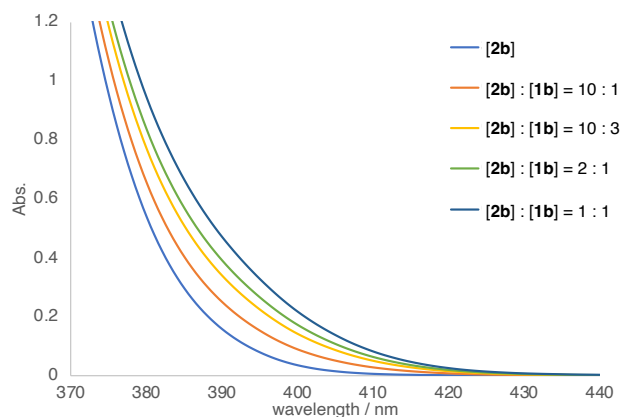

Figure S1. UV-Vis spectra

Solution (A) was prepared by dissolving **2b** (1.0 mg, 2.9  $\mu\text{mol}$ ) in toluene (12 mL).

Solution (B) was prepared by dissolving **1b** (2.9 mg, 2.9  $\mu\text{mol}$ ) in 4 mL of solution (A).

In quartz cell ( $l = 1 \text{ cm}$ ), 2.0 mL of solution (A) and various volume (0, 0.1, 0.3, 0.5, 1.0 mL) of solution (B) were mixed. Then UV-Vis spectra were measured by V-670 UV-VIS-NIR spectrometer (JASCO Co., Ltd.).

### Addition of MVK

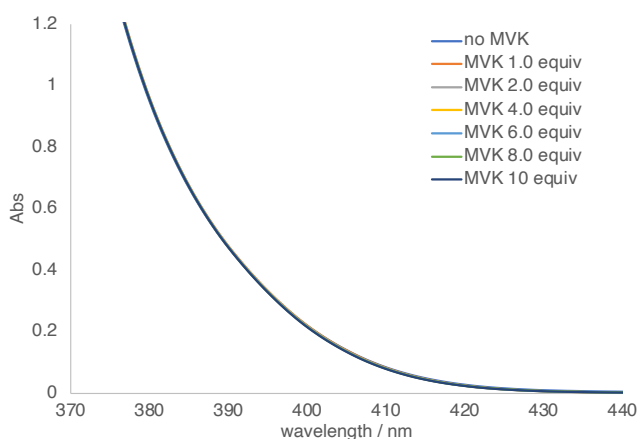

Figure S2. UV-Vis spectra of addition of MVK.

To a toluene solution of 1:1 ratio **2b** and **1b**, various amount of MVK was added and UV-Vis spectra were measured. However, no change was observed.

#### 4-2. $^1\text{H}$ NMR study

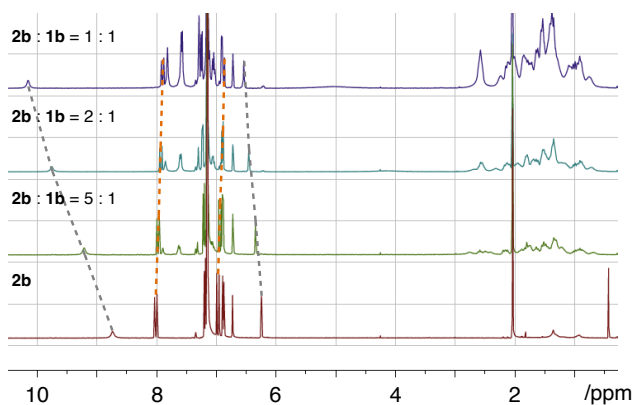

Figure S3.  $^1\text{H}$  NMR spectra of **2b** and **1b** in benzene- $d_6$ .

In a NMR tube, several ratio of **2b** and **1b** was mixed in benzene- $d_6$ . Interaction of **2b** and **1b** was observed in  $^1\text{H}$  NMR.

#### Addition of MVK

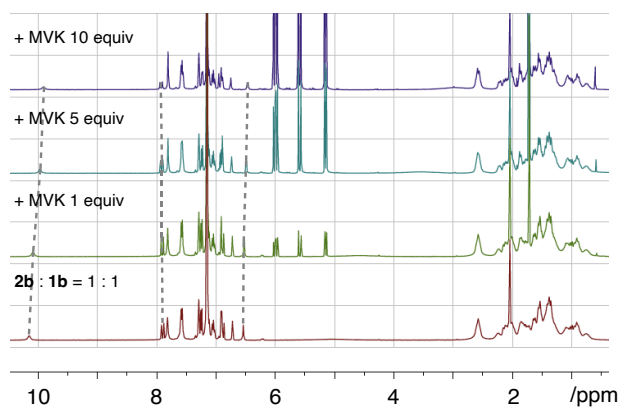

Figure S4.  $^1\text{H}$  NMR spectra of **2b** and **1b** with MVK in benzene- $d_6$ .

To the benzene- $d_6$  solution of 1:1 ratio **2b** and **1b**, various amount of MVK was added and  $^1\text{H}$  NMR were measured. However, remarkable change was not observed.



#### 4-3. Correlation between ee of **1b** and ee of **3ab** in photocycloaddition

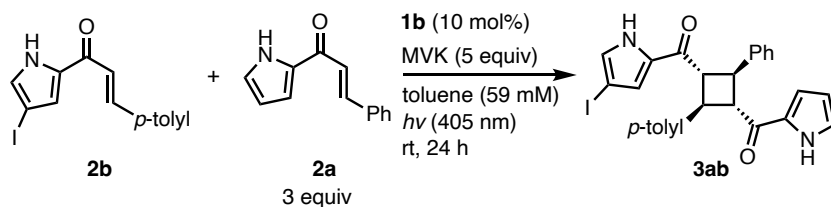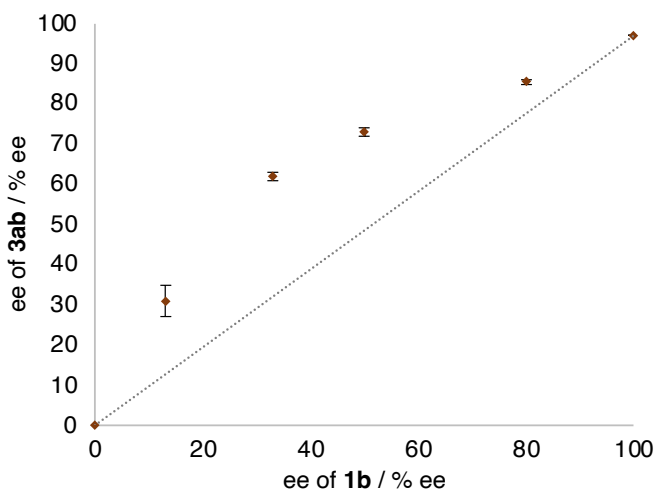

**Figure S5. Correlation of ee of **1b** and **3ab** in photocycloaddition.**

In a dried test tube, **2a** (17.3 mg, 0.088 mmol), **2b** (9.9 mg, 0.029 mmol), methyl vinyl ketone (12.3  $\mu$ L, 0.145 mmol) and various ratio (shown in Table S3) of (*R*)-**1b** and (*S*)-**1b** were mixed in toluene (0.5 mL), and degassed three times by the freeze-pump-thaw. The mixture was irradiated with 405 nm violet LED for 24 h. After the irradiation, the solvent was removed. The crude mixture was purified by preparative TLC on SiO<sub>2</sub> (toluene: ethyl acetate = 7 : 3 / v:v) to give **3ab**.

**Table S3. Results of the correlation of ee**

| ee of <b>1b</b> | ee of <b>3ab</b> |
|-----------------|------------------|
| 13% ee          | 27% ee           |
| 13% ee          | 35% ee           |
| 33% ee          | 61% ee           |
| 33% ee          | 63% ee           |
| 50% ee          | 72% ee           |
| 50% ee          | 74% ee           |
| 80% ee          | 86% ee           |
| 80% ee          | 86% ee           |
| 100% ee         | 97% ee           |

#### 4-4. Correlation between ee of 1b and ee of 3ag in photocycloaddition

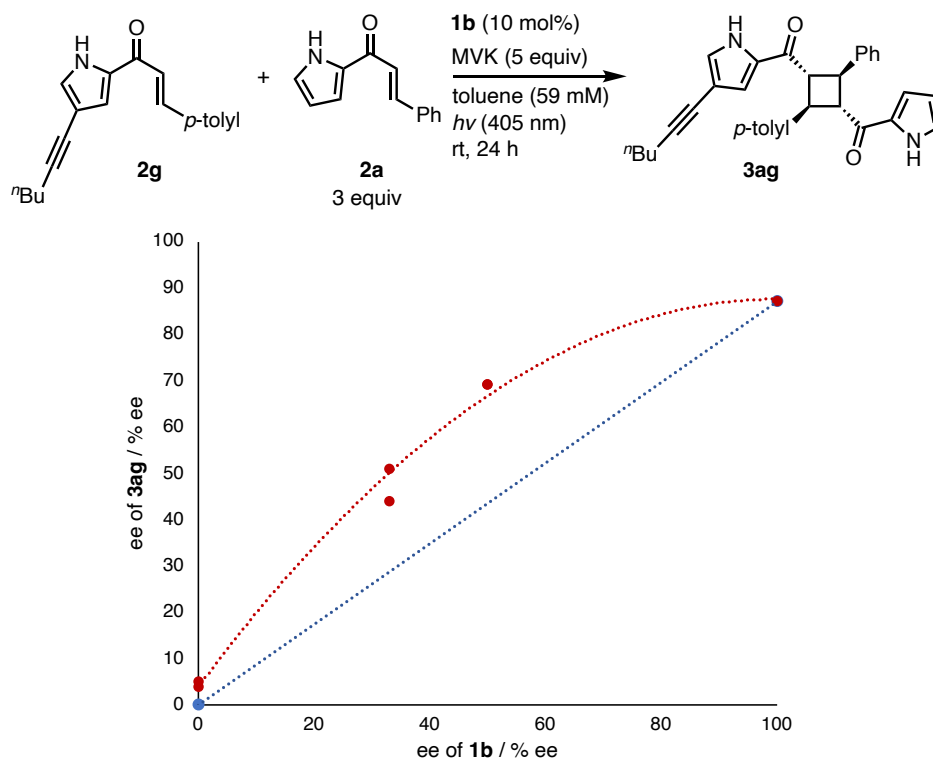

Figure S6. Correlation of ee of **1b** and **3ag** in photocycloaddition.

Table S4. Results of the correlation of ee

| ee of <b>1b</b> | ee of <b>3ab</b> |
|-----------------|------------------|
| 33% ee          | 44% ee           |
| 33% ee          | 51% ee           |
| 50% ee          | 69% ee           |
| 50% ee          | 69% ee           |
| 100% ee         | 87% ee           |

#### 4-5. DFT calculation

All calculations were performed with Gaussian 16 program by using M06-2X method with basis set of 6-31G (d,p) for other atoms.<sup>S1</sup> In order to elucidate the origin of the non-linear effect, we calculated and compared the monomer complex and dimer complex of **1f** as CPA and **2a** as substrate.

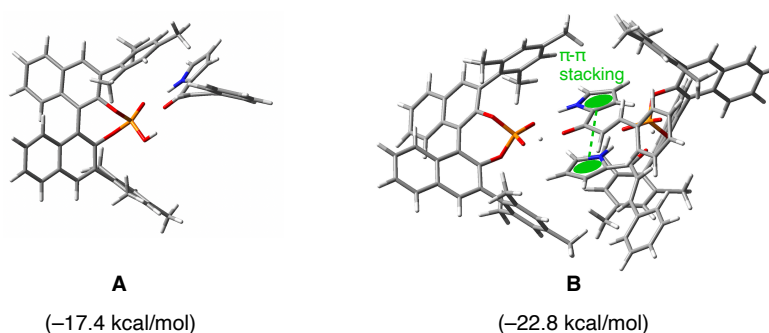

**Table S4. Sum of thermal free energies**

|           | G(hartree)   | G(kcal/mol)  |
|-----------|--------------|--------------|
| <b>1f</b> | -2109.068224 | -1323461.401 |
| <b>2a</b> | -631.540993  | -396298.289  |
| <b>A</b>  | -2740.623118 | -1719768.413 |
| <b>B</b>  | -5481.254729 | -3439542.155 |

#### Cartesian Coordinates

**1f**

**Charge = 0 Multiplicity = 1**

| Center Number | Atomic Number | Atomic Type | Coordinates (Angstroms) |          |           |    |    |   |           |           |           |  |
|---------------|---------------|-------------|-------------------------|----------|-----------|----|----|---|-----------|-----------|-----------|--|
|               |               |             | X                       | Y        | Z         |    |    |   |           |           |           |  |
| 1             | 6             | 0           | 2.256462                | 4.548883 | -2.593184 | 12 | 1  | 0 | -0.709546 | 3.490520  | -1.296558 |  |
| 2             | 6             | 0           | 3.069304                | 3.526038 | -2.182882 | 13 | 1  | 0 | 0.232834  | 5.324510  | -2.619315 |  |
| 3             | 6             | 0           | 2.548433                | 2.441583 | -1.427763 | 14 | 6  | 0 | 1.496880  | 0.271391  | -0.049923 |  |
| 4             | 6             | 0           | 1.170885                | 2.434717 | -1.070696 | 15 | 6  | 0 | 2.872854  | 0.259714  | -0.387964 |  |
| 5             | 6             | 0           | 0.349676                | 3.501040 | -1.528227 | 16 | 6  | 0 | -0.722868 | 1.353547  | 0.250094  |  |
| 6             | 6             | 0           | 0.878916                | 4.525677 | -2.270235 | 17 | 6  | 0 | -1.204740 | 2.441624  | 1.054152  |  |
| 7             | 1             | 0           | 4.433743                | 1.389470 | -1.281863 | 18 | 6  | 0 | -1.581483 | 0.307504  | -0.005240 |  |
| 8             | 1             | 0           | 2.660569                | 5.370160 | -3.175654 | 19 | 6  | 0 | -0.357616 | 3.480992  | 1.526263  |  |
| 9             | 1             | 0           | 4.125558                | 3.518695 | -2.437031 | 20 | 6  | 0 | -2.578185 | 2.468884  | 1.422758  |  |
| 10            | 6             | 0           | 3.374279                | 1.359151 | -1.038360 | 21 | 6  | 0 | -2.958603 | 0.313389  | 0.342816  |  |
| 11            | 6             | 0           | 0.662746                | 1.343747 | -0.290149 | 22 | 6  | 0 | -0.860027 | 4.503950  | 2.289311  |  |
|               |               |             |                         |          |           | 23 | 1  | 0 | 0.700232  | 3.449449  | 1.289430  |  |
|               |               |             |                         |          |           | 24 | 6  | 0 | -3.070893 | 3.550252  | 2.199345  |  |
|               |               |             |                         |          |           | 25 | 6  | 0 | -3.430001 | 1.404643  | 1.027991  |  |
|               |               |             |                         |          |           | 26 | 6  | 0 | -2.234530 | 4.550087  | 2.620240  |  |
|               |               |             |                         |          |           | 27 | 1  | 0 | -0.195271 | 5.282680  | 2.648475  |  |
|               |               |             |                         |          |           | 28 | 1  | 0 | -4.124747 | 3.559344  | 2.463062  |  |
|               |               |             |                         |          |           | 29 | 1  | 0 | -4.483576 | 1.448664  | 1.291935  |  |
|               |               |             |                         |          |           | 30 | 1  | 0 | -2.618452 | 5.369577  | 3.218715  |  |
|               |               |             |                         |          |           | 31 | 8  | 0 | 1.006727  | -0.821839 | 0.644321  |  |
|               |               |             |                         |          |           | 32 | 15 | 0 | -0.105331 | -1.787786 | -0.007156 |  |

|    |   |   |           |           |           |    |   |   |           |           |           |
|----|---|---|-----------|-----------|-----------|----|---|---|-----------|-----------|-----------|
| 33 | 8 | 0 | 0.520200  | -2.487115 | -1.262469 | 8  | 1 | 0 | 3.885068  | -2.833417 | -0.758815 |
| 34 | 1 | 0 | 0.988355  | -3.311190 | -0.968656 | 9  | 1 | 0 | 1.470992  | -1.632281 | -0.978476 |
| 35 | 8 | 0 | -0.650220 | -2.652630 | 1.058385  | 10 | 6 | 0 | 1.626229  | 1.265943  | 0.074897  |
| 36 | 8 | 0 | -1.115744 | -0.778807 | -0.738757 | 11 | 6 | 0 | 0.161213  | 1.162163  | -0.100499 |
| 37 | 6 | 0 | -3.849777 | -0.823968 | -0.044243 | 12 | 1 | 0 | -0.301378 | 2.111116  | -0.358579 |
| 38 | 6 | 0 | -4.040095 | -1.882784 | 0.869401  | 13 | 6 | 0 | -0.580981 | 0.068386  | 0.161248  |
| 39 | 6 | 0 | -4.497685 | -0.833937 | -1.292462 | 14 | 1 | 0 | -0.067409 | -0.827926 | 0.501106  |
| 40 | 6 | 0 | -4.880662 | -2.935708 | 0.513237  | 15 | 6 | 0 | -2.039851 | -0.052778 | 0.079100  |
| 41 | 6 | 0 | -5.324714 | -1.919394 | -1.599181 | 16 | 6 | 0 | -2.641060 | -1.253607 | 0.497496  |
| 42 | 6 | 0 | -5.529282 | -2.976016 | -0.719963 | 17 | 6 | 0 | -2.873823 | 0.973575  | -0.404806 |
| 43 | 1 | 0 | -5.028867 | -3.751055 | 1.216184  | 18 | 6 | 0 | -4.022542 | -1.425478 | 0.442379  |
| 44 | 1 | 0 | -5.827622 | -1.933556 | -2.564605 | 19 | 1 | 0 | -2.011804 | -2.056875 | 0.872125  |
| 45 | 6 | 0 | 3.770984  | -0.862968 | 0.019626  | 20 | 6 | 0 | -4.252665 | 0.802265  | -0.460365 |
| 46 | 6 | 0 | 4.272899  | -1.792814 | -0.913108 | 21 | 1 | 0 | -2.439712 | 1.908761  | -0.743552 |
| 47 | 6 | 0 | 4.206084  | -0.896622 | 1.373841  | 22 | 6 | 0 | -4.834131 | -0.396988 | -0.036691 |
| 48 | 6 | 0 | 5.238521  | -2.715601 | -0.465607 | 23 | 1 | 0 | -4.464248 | -2.360983 | 0.772590  |
| 49 | 6 | 0 | 5.116210  | -1.875822 | 1.753547  | 24 | 1 | 0 | -4.878993 | 1.605423  | -0.837363 |
| 50 | 6 | 0 | 5.670994  | -2.781390 | 0.847345  | 25 | 1 | 0 | -5.911291 | -0.526605 | -0.082395 |
| 51 | 1 | 0 | 5.680766  | -3.386154 | -1.195462 | 26 | 8 | 0 | 2.133136  | 2.364054  | 0.336573  |
| 52 | 1 | 0 | 5.442095  | -1.913017 | 2.791545  |    |   |   |           |           |           |
| 53 | 6 | 0 | -4.454446 | 0.290798  | -2.325357 |    |   |   |           |           |           |
| 54 | 1 | 0 | -4.813299 | -0.169218 | -3.254018 |    |   |   |           |           |           |
| 55 | 6 | 0 | -3.411008 | -1.859977 | 2.256095  |    |   |   |           |           |           |
| 56 | 1 | 0 | -2.476507 | -1.293918 | 2.194051  |    |   |   |           |           |           |
| 57 | 6 | 0 | -6.427184 | -4.140354 | -1.091650 |    |   |   |           |           |           |
| 58 | 1 | 0 | -6.823681 | -3.939286 | -2.094924 |    |   |   |           |           |           |
| 59 | 6 | 0 | 3.970845  | -1.904185 | -2.424507 |    |   |   |           |           |           |
| 60 | 1 | 0 | 4.940849  | -1.731931 | -2.913298 |    |   |   |           |           |           |
| 61 | 6 | 0 | 3.867482  | 0.139031  | 2.457639  |    |   |   |           |           |           |
| 62 | 1 | 0 | 4.500194  | -0.166907 | 3.298232  |    |   |   |           |           |           |
| 63 | 6 | 0 | 6.764623  | -3.722591 | 1.322100  |    |   |   |           |           |           |
| 64 | 1 | 0 | 6.394704  | -4.205943 | 2.237281  |    |   |   |           |           |           |
| 65 | 1 | 0 | -7.256077 | -4.224458 | -0.420261 |    |   |   |           |           |           |
| 66 | 1 | 0 | -5.876225 | -5.056744 | -1.131339 |    |   |   |           |           |           |
| 67 | 1 | 0 | -5.155474 | 1.056815  | -2.067138 |    |   |   |           |           |           |
| 68 | 1 | 0 | -3.502074 | 0.721412  | -2.554395 |    |   |   |           |           |           |
| 69 | 1 | 0 | -4.061182 | -1.364552 | 2.946549  |    |   |   |           |           |           |
| 70 | 1 | 0 | -3.165229 | -2.833328 | 2.626338  |    |   |   |           |           |           |
| 71 | 1 | 0 | 4.168272  | 1.138235  | 2.220957  |    |   |   |           |           |           |
| 72 | 1 | 0 | 2.869195  | 0.138067  | 2.842765  |    |   |   |           |           |           |
| 73 | 1 | 0 | 7.640339  | -3.166128 | 1.583580  |    |   |   |           |           |           |
| 74 | 1 | 0 | 7.015388  | -4.489228 | 0.619047  |    |   |   |           |           |           |
| 75 | 1 | 0 | 3.272145  | -1.237421 | -2.885098 |    |   |   |           |           |           |
| 76 | 1 | 0 | 3.673167  | -2.898735 | -2.683655 |    |   |   |           |           |           |

2a

Charge = 0 Multiplicity = 1

| Center Number | Atomic Number | Atomic Type | Coordinates (Angstroms) |           |           |
|---------------|---------------|-------------|-------------------------|-----------|-----------|
|               |               |             | X                       | Y         | Z         |
| 1             | 6             | 0           | 4.506204                | -0.899751 | 0.092387  |
| 2             | 6             | 0           | 3.631896                | -1.826785 | -0.458085 |
| 3             | 6             | 0           | 2.367380                | -1.203577 | -0.556383 |
| 4             | 6             | 0           | 2.496115                | 0.092612  | -0.056115 |
| 5             | 7             | 0           | 3.811647                | 0.245104  | 0.323956  |
| 6             | 1             | 0           | 4.151095                | 1.128755  | 0.677137  |
| 7             | 1             | 0           | 5.557152                | -0.980004 | 0.328569  |

A

Charge = 0 Multiplicity = 1

| Center Number | Atomic Number | Atomic Type | Coordinates (Angstroms) |           |           |
|---------------|---------------|-------------|-------------------------|-----------|-----------|
|               |               |             | X                       | Y         | Z         |
| 1             | 6             | 0           | 5.414174                | -1.069157 | 4.292416  |
| 2             | 6             | 0           | 5.425690                | 0.075650  | 3.541515  |
| 3             | 6             | 0           | 4.639289                | 0.181202  | 2.363376  |
| 4             | 6             | 0           | 3.853907                | -0.928762 | 1.944127  |
| 5             | 6             | 0           | 3.841783                | -2.092923 | 2.760929  |
| 6             | 6             | 0           | 4.600991                | -2.159093 | 3.900737  |
| 7             | 1             | 0           | 5.199969                | 2.229422  | 1.952510  |
| 8             | 1             | 0           | 6.013968                | -1.139554 | 5.193753  |
| 9             | 1             | 0           | 6.027774                | 0.929597  | 3.838976  |
| 10            | 6             | 0           | 4.599123                | 1.386359  | 1.620037  |
| 11            | 6             | 0           | 3.082133                | -0.815770 | 0.741712  |
| 12            | 1             | 0           | 3.214595                | -2.930852 | 2.478852  |
| 13            | 1             | 0           | 4.573252                | -3.054576 | 4.512916  |
| 14            | 6             | 0           | 3.054803                | 0.401871  | 0.092755  |
| 15            | 6             | 0           | 3.802613                | 1.531920  | 0.510000  |
| 16            | 6             | 0           | 2.262873                | -1.944147 | 0.221092  |
| 17            | 6             | 0           | 2.823491                | -3.224322 | -0.097416 |
| 18            | 6             | 0           | 0.915329                | -1.753564 | 0.003144  |
| 19            | 6             | 0           | 4.219701                | -3.485400 | -0.040834 |
| 20            | 6             | 0           | 1.955311                | -4.268882 | -0.522628 |
| 21            | 6             | 0           | 0.029947                | -2.773032 | -0.431924 |
| 22            | 6             | 0           | 4.715169                | -4.725305 | -0.353095 |
| 23            | 1             | 0           | 4.894888                | -2.686215 | 0.244134  |
| 24            | 6             | 0           | 2.498907                | -5.545578 | -0.825222 |
| 25            | 6             | 0           | 0.566789                | -4.015828 | -0.660816 |
| 26            | 6             | 0           | 3.846511                | -5.773618 | -0.738655 |
| 27            | 1             | 0           | 5.784660                | -4.903366 | -0.309590 |
| 28            | 1             | 0           | 1.820931                | -6.334935 | -1.137369 |
| 29            | 1             | 0           | -0.087448               | -4.824869 | -0.976355 |
| 30            | 1             | 0           | 4.252855                | -6.751098 | -0.976568 |
| 31            | 8             | 0           | 2.281463                | 0.538094  | -1.051115 |
| 32            | 15            | 0           | 0.673622                | 0.600705  | -0.898349 |

|    |   |   |           |           |           |
|----|---|---|-----------|-----------|-----------|
| 33 | 8 | 0 | 0.313394  | 1.902690  | -0.090610 |
| 34 | 1 | 0 | -0.706021 | 2.378774  | -0.314697 |
| 35 | 8 | 0 | 0.057117  | 0.368019  | -2.218184 |
| 36 | 8 | 0 | 0.373054  | -0.492674 | 0.241352  |
| 37 | 6 | 0 | -1.424044 | -2.495886 | -0.615034 |
| 38 | 6 | 0 | -1.970374 | -2.441884 | -1.906999 |
| 39 | 6 | 0 | -2.239750 | -2.310936 | 0.513000  |
| 40 | 6 | 0 | -3.338706 | -2.209847 | -2.045468 |
| 41 | 6 | 0 | -3.602370 | -2.085623 | 0.329854  |
| 42 | 6 | 0 | -4.169611 | -2.028399 | -0.942211 |
| 43 | 1 | 0 | -3.764513 | -2.163477 | -3.045330 |
| 44 | 1 | 0 | -4.236565 | -1.951350 | 1.203582  |
| 45 | 6 | 0 | 3.740236  | 2.843273  | -0.201273 |
| 46 | 6 | 0 | 3.148443  | 3.942832  | 0.442843  |
| 47 | 6 | 0 | 4.349149  | 3.001112  | -1.458563 |
| 48 | 6 | 0 | 3.221586  | 5.199084  | -0.162343 |
| 49 | 6 | 0 | 4.419592  | 4.276834  | -2.015712 |
| 50 | 6 | 0 | 3.880915  | 5.392152  | -1.373670 |
| 51 | 1 | 0 | 2.767027  | 6.050959  | 0.339427  |
| 52 | 1 | 0 | 4.906637  | 4.400188  | -2.981081 |
| 53 | 6 | 0 | -1.656595 | -2.357458 | 1.902487  |
| 54 | 1 | 0 | -2.447763 | -2.351092 | 2.655066  |
| 55 | 6 | 0 | -1.103790 | -2.603688 | -3.130896 |
| 56 | 1 | 0 | -0.296216 | -1.866277 | -3.119623 |
| 57 | 6 | 0 | -5.639274 | -1.744627 | -1.119087 |
| 58 | 1 | 0 | -6.223390 | -2.146857 | -0.287578 |
| 59 | 6 | 0 | 2.444805  | 3.791940  | 1.770512  |
| 60 | 1 | 0 | 3.156706  | 3.665113  | 2.592214  |
| 61 | 6 | 0 | 4.914517  | 1.822263  | -2.205917 |
| 62 | 1 | 0 | 5.513158  | 2.152899  | -3.057120 |
| 63 | 6 | 0 | 4.022074  | 6.766336  | -1.976740 |
| 64 | 1 | 0 | 3.808952  | 6.754781  | -3.050300 |
| 65 | 6 | 0 | -3.276827 | 0.000935  | -3.754127 |
| 66 | 6 | 0 | -4.640936 | -0.079002 | -3.515079 |
| 67 | 6 | 0 | -4.872882 | 0.522410  | -2.263616 |
| 68 | 6 | 0 | -3.641255 | 0.957623  | -1.779901 |
| 69 | 7 | 0 | -2.692070 | 0.634693  | -2.714272 |
| 70 | 1 | 0 | -1.691142 | 0.826743  | -2.606294 |
| 71 | 1 | 0 | -2.689840 | -0.352605 | -4.588575 |
| 72 | 1 | 0 | -5.375324 | -0.517789 | -4.173531 |
| 73 | 1 | 0 | -5.826225 | 0.672106  | -1.777275 |
| 74 | 6 | 0 | -3.259388 | 1.729359  | -0.602847 |
| 75 | 6 | 0 | -4.117310 | 1.737753  | 0.599208  |
| 76 | 1 | 0 | -3.561678 | 1.867810  | 1.524097  |
| 77 | 6 | 0 | -5.436543 | 1.495603  | 0.582759  |
| 78 | 1 | 0 | -5.913785 | 1.311712  | -0.377691 |
| 79 | 6 | 0 | -6.326133 | 1.432885  | 1.749614  |
| 80 | 6 | 0 | -7.683864 | 1.159859  | 1.542726  |
| 81 | 6 | 0 | -5.878028 | 1.641904  | 3.062268  |
| 82 | 6 | 0 | -8.572217 | 1.097928  | 2.610761  |
| 83 | 1 | 0 | -8.040890 | 0.994593  | 0.529799  |
| 84 | 6 | 0 | -6.763811 | 1.580471  | 4.128854  |
| 85 | 1 | 0 | -4.829642 | 1.851344  | 3.249213  |
| 86 | 6 | 0 | -8.114095 | 1.308997  | 3.907534  |
| 87 | 1 | 0 | -9.620594 | 0.884432  | 2.430215  |
| 88 | 1 | 0 | -6.401754 | 1.743556  | 5.138712  |
| 89 | 1 | 0 | -8.803434 | 1.261380  | 4.744149  |
| 90 | 8 | 0 | -2.207352 | 2.371187  | -0.594109 |
| 91 | 1 | 0 | -6.018223 | -2.180121 | -2.046797 |
| 92 | 1 | 0 | -5.824214 | -0.666159 | -1.160765 |

|     |   |   |           |           |           |
|-----|---|---|-----------|-----------|-----------|
| 93  | 1 | 0 | -1.048299 | -3.255034 | 2.049385  |
| 94  | 1 | 0 | -1.011345 | -1.491140 | 2.080877  |
| 95  | 1 | 0 | -0.651900 | -3.598707 | -3.181934 |
| 96  | 1 | 0 | -1.693962 | -2.452796 | -4.037234 |
| 97  | 1 | 0 | 5.537980  | 1.198456  | -1.558076 |
| 98  | 1 | 0 | 4.103092  | 1.195505  | -2.592117 |
| 99  | 1 | 0 | 5.040923  | 7.145444  | -1.846549 |
| 100 | 1 | 0 | 3.342678  | 7.479551  | -1.501372 |
| 101 | 1 | 0 | 1.786719  | 2.919004  | 1.772503  |
| 102 | 1 | 0 | 1.843894  | 4.678584  | 1.984780  |

## B

### Charge = 0 Multiplicity = 1

| Center Number | Atomic Number | Atomic Type | Coordinates (Angstroms) |           |           |
|---------------|---------------|-------------|-------------------------|-----------|-----------|
|               |               |             | X                       | Y         | Z         |
| 1             | 6             | 0           | -7.081342               | -6.024785 | -3.799154 |
| 2             | 6             | 0           | -6.229423               | -5.106527 | -4.352904 |
| 3             | 6             | 0           | -5.906644               | -3.904836 | -3.669389 |
| 4             | 6             | 0           | -6.504715               | -3.641555 | -2.404088 |
| 5             | 6             | 0           | -7.360146               | -4.627980 | -1.842071 |
| 6             | 6             | 0           | -7.640672               | -5.785419 | -2.522106 |
| 7             | 1             | 0           | -4.485901               | -3.233623 | -5.157947 |
| 8             | 1             | 0           | -7.316815               | -6.942010 | -4.328629 |
| 9             | 1             | 0           | -5.773317               | -5.287132 | -5.322187 |
| 10            | 6             | 0           | -4.958530               | -2.996325 | -4.208096 |
| 11            | 6             | 0           | -6.189459               | -2.414187 | -1.734273 |
| 12            | 1             | 0           | -7.785984               | -4.459125 | -0.859329 |
| 13            | 1             | 0           | -8.292868               | -6.527939 | -2.073948 |
| 14            | 6             | 0           | -5.251149               | -1.587223 | -2.312050 |
| 15            | 6             | 0           | -4.587883               | -1.857728 | -3.538269 |
| 16            | 6             | 0           | -6.773100               | -2.027514 | -0.419594 |
| 17            | 6             | 0           | -8.187354               | -1.924955 | -0.205452 |
| 18            | 6             | 0           | -5.935580               | -1.692261 | 0.625181  |
| 19            | 6             | 0           | -9.133416               | -2.104228 | -1.251271 |
| 20            | 6             | 0           | -8.669894               | -1.590836 | 1.091203  |
| 21            | 6             | 0           | -6.393418               | -1.329681 | 1.920307  |
| 22            | 6             | 0           | -10.478835              | -2.002544 | -1.007882 |
| 23            | 1             | 0           | -8.778152               | -2.313794 | -2.253867 |
| 24            | 6             | 0           | -10.069884              | -1.506970 | 1.313890  |
| 25            | 6             | 0           | -7.748613               | -1.312015 | 2.133054  |
| 26            | 6             | 0           | -10.957695              | -1.714033 | 0.291807  |
| 27            | 1             | 0           | -11.183477              | -2.137933 | -1.821837 |
| 28            | 1             | 0           | -10.420100              | -1.262611 | 2.312855  |
| 29            | 1             | 0           | -8.128920               | -1.051991 | 3.117811  |
| 30            | 1             | 0           | -12.025469              | -1.642987 | 0.470555  |
| 31            | 8             | 0           | -4.916954               | -0.415212 | -1.649761 |
| 32            | 15            | 0           | -3.850794               | -0.590283 | -0.449089 |
| 33            | 8             | 0           | -4.557377               | -1.734339 | 0.443679  |
| 34            | 6             | 0           | -5.412757               | -0.966574 | 2.986061  |
| 35            | 6             | 0           | -5.233674               | 0.383072  | 3.333917  |
| 36            | 6             | 0           | -4.666991               | -1.970739 | 3.624153  |
| 37            | 6             | 0           | -4.280414               | 0.703588  | 4.300234  |
| 38            | 6             | 0           | -3.736416               | -1.607973 | 4.598820  |
| 39            | 6             | 0           | -3.513840               | -0.273442 | 4.933385  |
| 40            | 1             | 0           | -4.123705               | 1.750520  | 4.555551  |
| 41            | 1             | 0           | -3.151714               | -2.385050 | 5.087147  |

|     |   |   |           |           |           |     |    |   |           |           |           |
|-----|---|---|-----------|-----------|-----------|-----|----|---|-----------|-----------|-----------|
| 42  | 6 | 0 | -3.475934 | -0.964981 | -3.978126 | 102 | 1  | 0 | -3.295340 | 1.445323  | 0.147534  |
| 43  | 6 | 0 | -2.153864 | -1.433695 | -3.876249 | 103 | 6  | 0 | 7.925299  | -6.610230 | -0.363631 |
| 44  | 6 | 0 | -3.731341 | 0.355571  | -4.378324 | 104 | 6  | 0 | 7.011349  | -6.362730 | 0.626105  |
| 45  | 6 | 0 | -1.110665 | -0.559218 | -4.157581 | 105 | 6  | 0 | 6.535874  | -5.046352 | 0.867136  |
| 46  | 6 | 0 | -2.652250 | 1.203508  | -4.646064 | 106 | 6  | 0 | 7.042976  | -3.968196 | 0.086927  |
| 47  | 6 | 0 | -1.335405 | 0.767328  | -4.524231 | 107 | 6  | 0 | 7.966792  | -4.262302 | -0.952404 |
| 48  | 1 | 0 | -0.085773 | -0.911270 | -4.057522 | 108 | 6  | 0 | 8.395678  | -5.546612 | -1.169140 |
| 49  | 1 | 0 | -2.850843 | 2.231072  | -4.942747 | 109 | 1  | 0 | 5.127940  | -5.644524 | 2.398674  |
| 50  | 6 | 0 | -4.846026 | -3.417265 | 3.240846  | 110 | 1  | 0 | 8.278606  | -7.620269 | -0.542906 |
| 51  | 1 | 0 | -4.292420 | -4.070800 | 3.918160  | 111 | 1  | 0 | 6.622791  | -7.172258 | 1.237688  |
| 52  | 6 | 0 | -6.045998 | 1.473671  | 2.681736  | 112 | 6  | 0 | 5.527630  | -4.804410 | 1.836003  |
| 53  | 1 | 0 | -6.034868 | 1.374065  | 1.594096  | 113 | 6  | 0 | 6.575010  | -2.640159 | 0.356948  |
| 54  | 6 | 0 | -2.422036 | 0.118279  | 5.893130  | 114 | 1  | 0 | 8.326628  | -3.456545 | -1.582311 |
| 55  | 1 | 0 | -2.156908 | -0.706959 | 6.559081  | 115 | 1  | 0 | 9.098059  | -5.750449 | -1.970740 |
| 56  | 6 | 0 | -1.848504 | -2.830948 | -3.398800 | 116 | 6  | 0 | 5.583872  | -2.483571 | 1.301514  |
| 57  | 1 | 0 | -2.219785 | -3.592977 | -4.090049 | 117 | 6  | 0 | 5.011167  | -3.549955 | 2.044259  |
| 58  | 6 | 0 | -5.143839 | 0.870246  | -4.496946 | 118 | 6  | 0 | 7.061351  | -1.440444 | -0.380118 |
| 59  | 1 | 0 | -5.168094 | 1.808921  | -5.054773 | 119 | 6  | 0 | 8.448501  | -1.079534 | -0.432184 |
| 60  | 6 | 0 | -0.156483 | 1.676891  | -4.768018 | 120 | 6  | 0 | 6.150500  | -0.603573 | -0.992991 |
| 61  | 1 | 0 | -0.473465 | 2.718543  | -4.867634 | 121 | 6  | 0 | 9.451586  | -1.786878 | 0.285583  |
| 62  | 6 | 0 | 0.756547  | 0.297032  | -1.357241 | 122 | 6  | 0 | 8.840583  | 0.055112  | -1.197041 |
| 63  | 6 | 0 | 1.742355  | 1.281759  | -1.417706 | 123 | 6  | 0 | 6.515541  | 0.546001  | -1.741062 |
| 64  | 6 | 0 | 1.104858  | 2.502463  | -1.166478 | 124 | 6  | 0 | 10.768332 | -1.412444 | 0.207813  |
| 65  | 6 | 0 | -0.259064 | 2.235742  | -0.963743 | 125 | 1  | 0 | 9.162646  | -2.625291 | 0.909085  |
| 66  | 7 | 0 | -0.424726 | 0.876068  | -1.089034 | 126 | 6  | 0 | 10.214504 | 0.408134  | -1.268831 |
| 67  | 1 | 0 | -1.295826 | 0.349257  | -0.975939 | 127 | 6  | 0 | 7.853283  | 0.835488  | -1.849452 |
| 68  | 1 | 0 | 0.838440  | -0.775717 | -1.456665 | 128 | 6  | 0 | 11.160616 | -0.310604 | -0.588425 |
| 69  | 1 | 0 | 2.796002  | 1.122803  | -1.602200 | 129 | 1  | 0 | 11.516935 | -1.962591 | 0.768407  |
| 70  | 1 | 0 | 1.589282  | 3.464050  | -1.073822 | 130 | 1  | 0 | 10.495721 | 1.270149  | -1.867247 |
| 71  | 6 | 0 | -1.344315 | 3.079754  | -0.529507 | 131 | 1  | 0 | 8.164297  | 1.699730  | -2.431398 |
| 72  | 6 | 0 | -1.181588 | 4.550417  | -0.495095 | 132 | 1  | 0 | 12.207284 | -0.030552 | -0.644826 |
| 73  | 1 | 0 | -1.772528 | 5.034777  | 0.279366  | 133 | 8  | 0 | 5.109169  | -1.202539 | 1.548200  |
| 74  | 6 | 0 | -0.471608 | 5.249001  | -1.388239 | 134 | 15 | 0 | 4.033037  | -0.634677 | 0.486738  |
| 75  | 1 | 0 | 0.061142  | 4.704227  | -2.165492 | 135 | 8  | 0 | 4.793396  | -0.893037 | -0.914980 |
| 76  | 6 | 0 | -0.324850 | 6.711797  | -1.432481 | 136 | 6  | 0 | 5.475770  | 1.402972  | -2.381461 |
| 77  | 6 | 0 | 0.667557  | 7.262205  | -2.253366 | 137 | 6  | 0 | 5.208192  | 2.682410  | -1.862443 |
| 78  | 6 | 0 | -1.131655 | 7.578898  | -0.681426 | 138 | 6  | 0 | 4.790381  | 0.936239  | -3.514133 |
| 79  | 6 | 0 | 0.865848  | 8.637586  | -2.311076 | 139 | 6  | 0 | 4.254287  | 3.474976  | -2.499081 |
| 80  | 1 | 0 | 1.291053  | 6.596797  | -2.845577 | 140 | 6  | 0 | 3.848339  | 1.764060  | -4.123815 |
| 81  | 6 | 0 | -0.936033 | 8.952942  | -0.742695 | 141 | 6  | 0 | 3.566631  | 3.033872  | -3.628887 |
| 82  | 1 | 0 | -1.924006 | 7.178024  | -0.056593 | 142 | 1  | 0 | 4.041986  | 4.465472  | -2.099162 |
| 83  | 6 | 0 | 0.064830  | 9.487301  | -1.553908 | 143 | 1  | 0 | 3.316457  | 1.403424  | -5.001800 |
| 84  | 1 | 0 | 1.642952  | 9.045449  | -2.949020 | 144 | 6  | 0 | 3.841257  | -3.288326 | 2.932571  |
| 85  | 1 | 0 | -1.575560 | 9.611976  | -0.163460 | 145 | 6  | 0 | 2.569454  | -3.738296 | 2.532231  |
| 86  | 1 | 0 | 0.212121  | 10.561284 | -1.600790 | 146 | 6  | 0 | 3.990981  | -2.542584 | 4.110314  |
| 87  | 8 | 0 | -2.434198 | 2.634134  | -0.131493 | 147 | 6  | 0 | 1.469430  | -3.424858 | 3.325682  |
| 88  | 1 | 0 | -2.715133 | 0.975883  | 6.504929  | 148 | 6  | 0 | 2.856867  | -2.229194 | 4.862932  |
| 89  | 1 | 0 | -1.520232 | 0.396808  | 5.333370  | 149 | 6  | 0 | 1.586306  | -2.650437 | 4.480343  |
| 90  | 1 | 0 | -5.900448 | -3.707915 | 3.263685  | 150 | 1  | 0 | 0.485005  | -3.776732 | 3.023581  |
| 91  | 1 | 0 | -4.481072 | -3.592329 | 2.223150  | 151 | 1  | 0 | 2.972728  | -1.633739 | 5.765858  |
| 92  | 1 | 0 | -7.090022 | 1.440617  | 3.009661  | 152 | 6  | 0 | 5.060720  | -0.440628 | -4.063250 |
| 93  | 1 | 0 | -5.642866 | 2.455552  | 2.939518  | 153 | 1  | 0 | 4.562301  | -0.579647 | -5.024632 |
| 94  | 1 | 0 | -5.787878 | 0.149136  | -5.008119 | 154 | 6  | 0 | 5.925987  | 3.199805  | -0.641089 |
| 95  | 1 | 0 | -5.574193 | 1.052154  | -3.506914 | 155 | 1  | 0 | 5.906500  | 2.460750  | 0.163368  |
| 96  | 1 | 0 | 0.377494  | 1.399806  | -5.684310 | 156 | 6  | 0 | 2.514580  | 3.894528  | -4.265510 |
| 97  | 1 | 0 | 0.559041  | 1.613826  | -3.934720 | 157 | 1  | 0 | 2.262706  | 3.543349  | -5.268278 |
| 98  | 1 | 0 | -2.310982 | -3.005942 | -2.423497 | 158 | 6  | 0 | 2.367954  | -4.478803 | 1.233610  |
| 99  | 1 | 0 | -0.769907 | -2.968001 | -3.293542 | 159 | 1  | 0 | 2.899630  | -5.433751 | 1.211555  |
| 100 | 8 | 0 | -2.496967 | -1.007974 | -0.866562 | 160 | 6  | 0 | 5.349997  | -2.063110 | 4.552978  |
| 101 | 8 | 0 | -4.011218 | 0.742879  | 0.333904  | 161 | 1  | 0 | 5.319892  | -1.714190 | 5.587344  |

|     |   |   |           |           |          |     |   |   |           |           |           |
|-----|---|---|-----------|-----------|----------|-----|---|---|-----------|-----------|-----------|
| 162 | 6 | 0 | 0.355496  | -2.276487 | 5.265296 | 186 | 1 | 0 | -2.997848 | 6.930055  | 5.582579  |
| 163 | 1 | 0 | 0.590206  | -1.558437 | 6.054684 | 187 | 1 | 0 | -0.842489 | 8.441227  | 2.185270  |
| 164 | 6 | 0 | -0.542672 | -1.091659 | 1.830324 | 188 | 1 | 0 | -2.346659 | 8.833892  | 4.128709  |
| 165 | 6 | 0 | -1.709942 | -0.392775 | 2.123775 | 189 | 8 | 0 | 2.139930  | 2.060930  | 1.768325  |
| 166 | 6 | 0 | -1.349933 | 0.951713  | 2.268296 | 190 | 1 | 0 | 2.839201  | 4.938018  | -4.338077 |
| 167 | 6 | 0 | 0.038545  | 1.038860  | 2.090924 | 191 | 1 | 0 | 1.592329  | 3.867289  | -3.672152 |
| 168 | 7 | 0 | 0.492111  | -0.234267 | 1.831273 | 192 | 1 | 0 | 6.132775  | -0.608926 | -4.201598 |
| 169 | 1 | 0 | 1.436411  | -0.497630 | 1.540687 | 193 | 1 | 0 | 4.694959  | -1.208593 | -3.373843 |
| 170 | 1 | 0 | -0.390924 | -2.133415 | 1.590711 | 194 | 1 | 0 | 6.973893  | 3.428259  | -0.859190 |
| 171 | 1 | 0 | -2.706345 | -0.805065 | 2.194393 | 195 | 1 | 0 | 5.450734  | 4.114142  | -0.279464 |
| 172 | 1 | 0 | -2.031163 | 1.773798  | 2.429122 | 196 | 1 | 0 | 6.094365  | -2.861238 | 4.480050  |
| 173 | 6 | 0 | 0.933056  | 2.165464  | 2.039228 | 197 | 1 | 0 | 5.692489  | -1.235514 | 3.923976  |
| 174 | 6 | 0 | 0.424640  | 3.539034  | 2.259603 | 198 | 1 | 0 | -0.099688 | -3.156276 | 5.732757  |
| 175 | 1 | 0 | 0.966468  | 4.284933  | 1.683049 | 199 | 1 | 0 | -0.397062 | -1.827155 | 4.606170  |
| 176 | 6 | 0 | -0.517173 | 3.892742  | 3.144813 | 200 | 1 | 0 | 2.731609  | -3.871734 | 0.398797  |
| 177 | 1 | 0 | -0.962399 | 3.122783  | 3.771917 | 201 | 1 | 0 | 1.306355  | -4.679586 | 1.071434  |
| 178 | 6 | 0 | -0.998531 | 5.260262  | 3.384286 | 202 | 8 | 0 | 2.716884  | -1.307313 | 0.495936  |
| 179 | 6 | 0 | -1.855632 | 5.492910  | 4.466873 | 203 | 8 | 0 | 4.083851  | 0.894027  | 0.750615  |
| 180 | 6 | 0 | -0.646918 | 6.343156  | 2.563948 | 204 | 1 | 0 | 3.231633  | 1.308617  | 1.141821  |
| 181 | 6 | 0 | -2.337345 | 6.769355  | 4.736824 |     |   |   |           |           |           |
| 182 | 1 | 0 | -2.140640 | 4.659037  | 5.103333 |     |   |   |           |           |           |
| 183 | 6 | 0 | -1.128031 | 7.617773  | 2.832953 |     |   |   |           |           |           |
| 184 | 1 | 0 | -0.002203 | 6.190192  | 1.702328 |     |   |   |           |           |           |
| 185 | 6 | 0 | -1.972591 | 7.836598  | 3.921301 |     |   |   |           |           |           |

## 5. HPLC data

### 3ab

CHIRALPAK® IF-3 column, *n*-hexane/*i*-PrOH = 7/3, flow rate = 0.5 mL/min,  $t_{\text{major}} = 36.70$  min,  $t_{\text{minor}} = 41.70$  min.

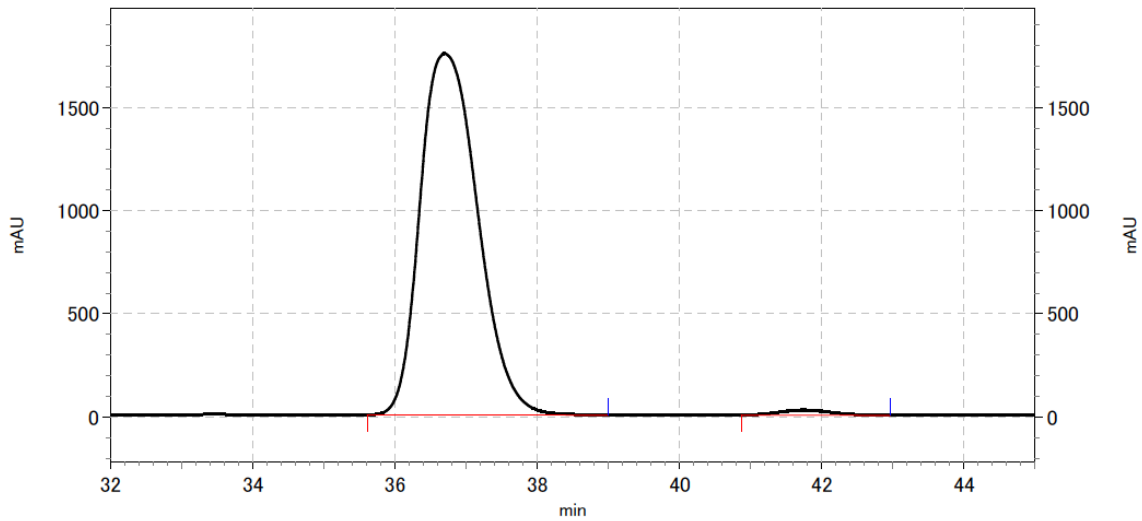

| Peak # | Retention time | Area      | Area % |
|--------|----------------|-----------|--------|
| 1      | 36.700         | 394544953 | 98.670 |
| 2      | 41.740         | 5318253   | 1.330  |

### Racemate

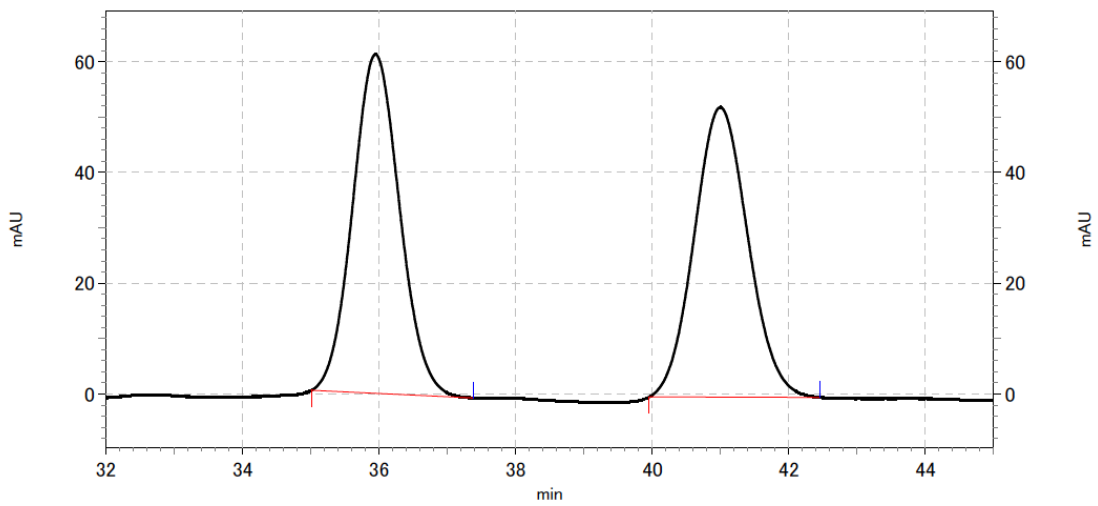

| Peak # | Retention time | Area     | Area % |
|--------|----------------|----------|--------|
| 1      | 35.953         | 11712105 | 50.590 |
| 2      | 41.000         | 11438835 | 49.410 |



### 3ac

CHIRALPAK® IF-3 column, *n*-hexane/*i*-PrOH = 7/3, flow rate = 0.5 mL/min,  $t_{\text{major}} = 31.89$  min,  $t_{\text{minor}} = 34.76$  min.

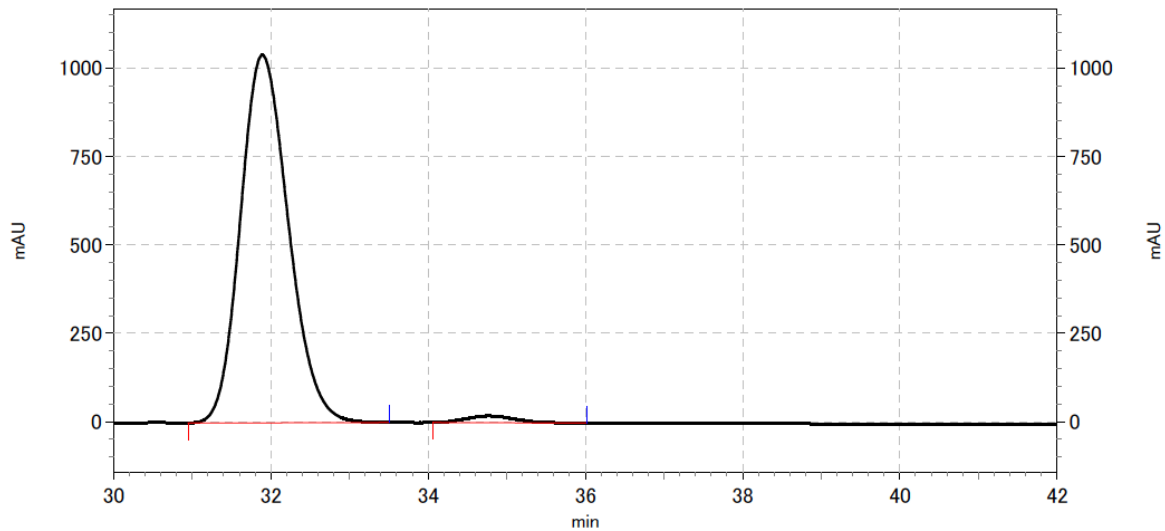

| Peak # | Retention time | Area      | Area % |
|--------|----------------|-----------|--------|
| 1      | 31.893         | 176162551 | 98.156 |
| 2      | 34.767         | 3310208   | 1.844  |

### Racemate

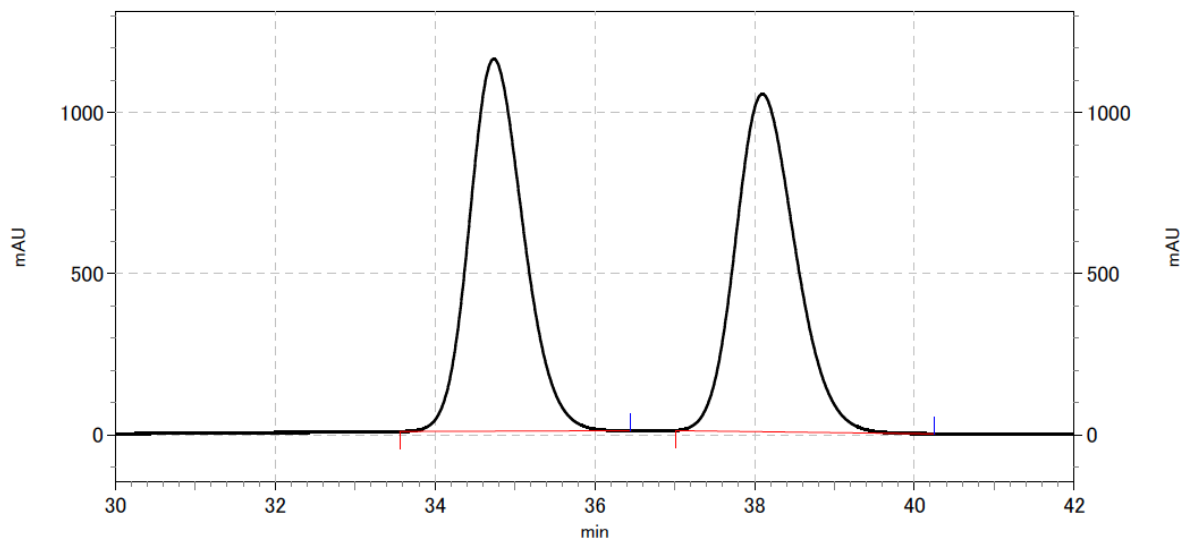

| Peak # | Retention time | Area      | Area % |
|--------|----------------|-----------|--------|
| 1      | 34.740         | 218428161 | 49.911 |
| 2      | 38.100         | 219208512 | 50.089 |

**3ad**

CHIRALPAK® IF-3 column, *n*-hexane/*i*-PrOH = 7/3, flow rate = 0.5 mL/min,  $t_{major} = 35.32$  min,  $t_{minor} = 38.16$  min.

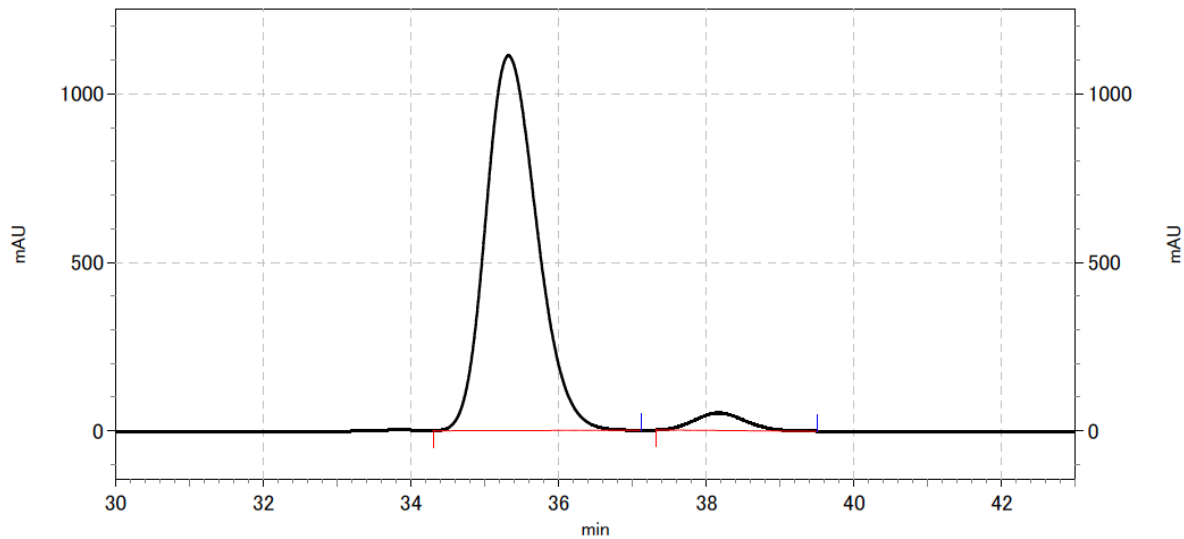

| Peak # | Retention time | Area      | Area % |
|--------|----------------|-----------|--------|
| 1      | 35.327         | 214433451 | 95.472 |
| 2      | 38.167         | 10169716  | 4.528  |

**Racemate**

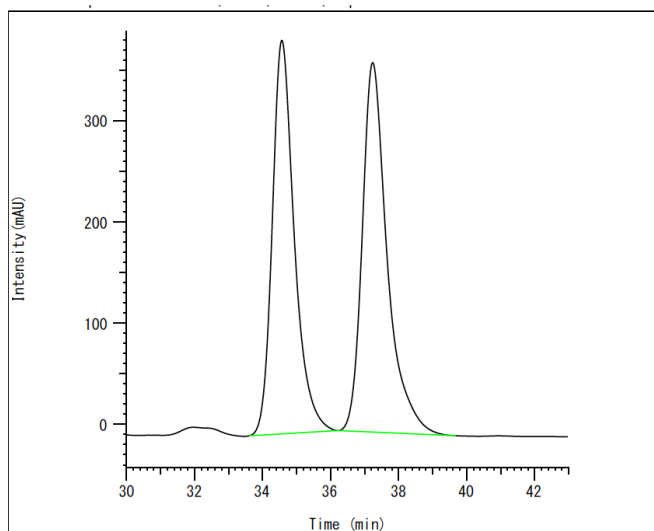

5430 Diode Array Detector SampleID:1 kt-349-rac (Extract, 300nm) Repeat:1

| No. Compounds | RT     | Area     | Area%   |
|---------------|--------|----------|---------|
| 1 Peak 1      | 34.487 | 17478901 | 48.478  |
| 2 Peak 2      | 37.240 | 18576281 | 51.522  |
|               |        | 36055182 | 100.000 |

**3ae**

CHIRALPAK® IF-3 column, *n*-hexane/*i*-PrOH = 7/3, flow rate = 0.5 mL/min,  $t_{\text{major}} = 45.94$  min,  $t_{\text{minor}} = 59.10$  min.

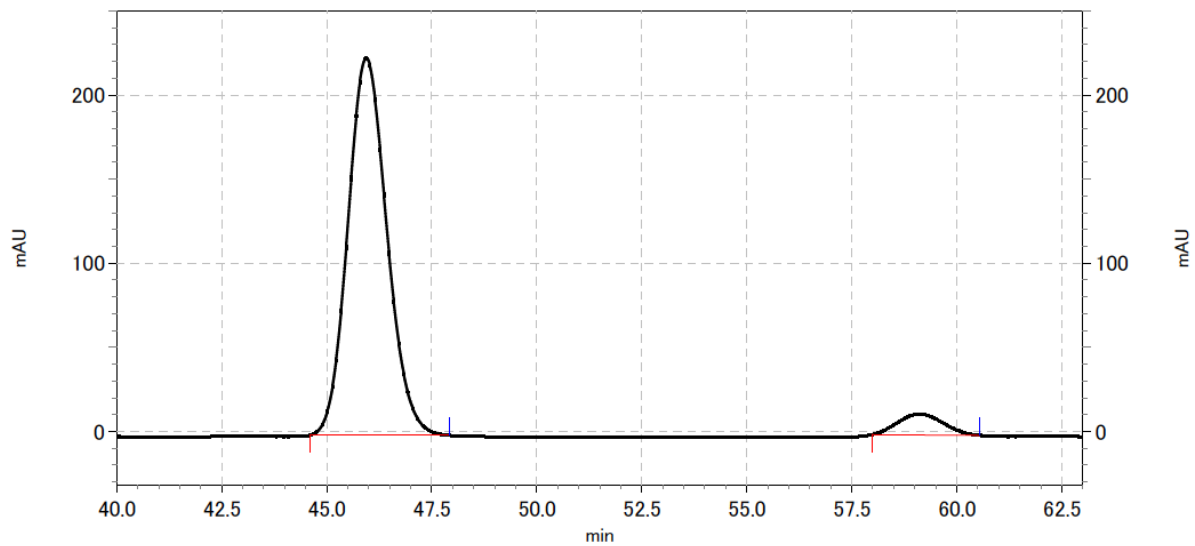

| Peak # | Retention time | Area     | Area % |
|--------|----------------|----------|--------|
| 1      | 45.940         | 58170513 | 93.977 |
| 2      | 59.107         | 3728442  | 6.023  |

**Racemate**

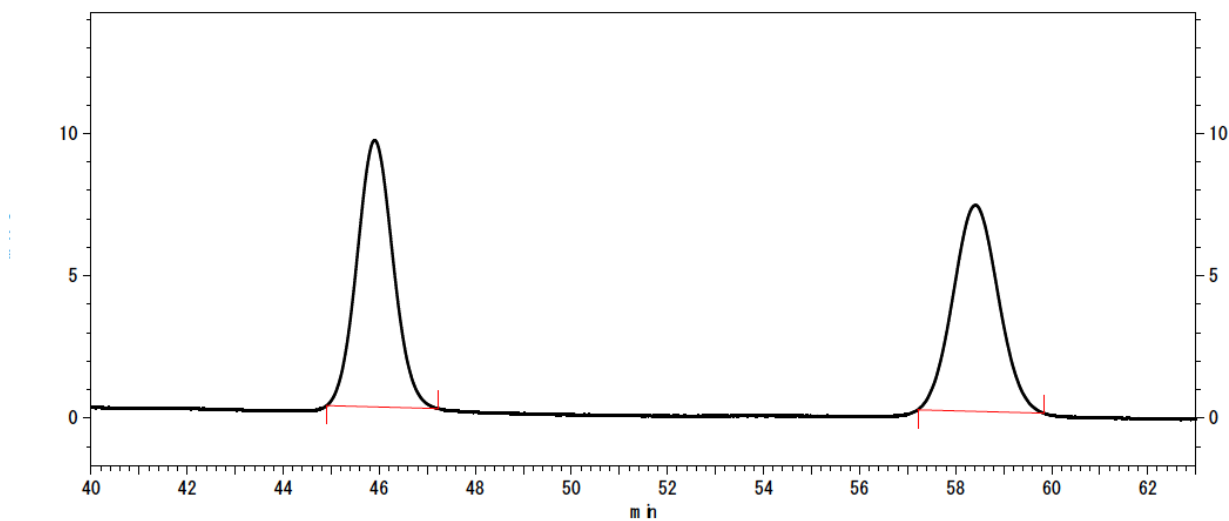

| Peak # | Retention time | Area    | Area % |
|--------|----------------|---------|--------|
| 1      | 45.900         | 1959874 | 50.754 |
| 2      | 58.413         | 1901657 | 49.246 |

### 3af

CHIRALPAK® IF-3 column, *n*-hexane/*i*-PrOH = 7/3, flow rate = 0.5 mL/min,  $t_{\text{major}} = 51.50$  min,  $t_{\text{minor}} = 57.02$  min.

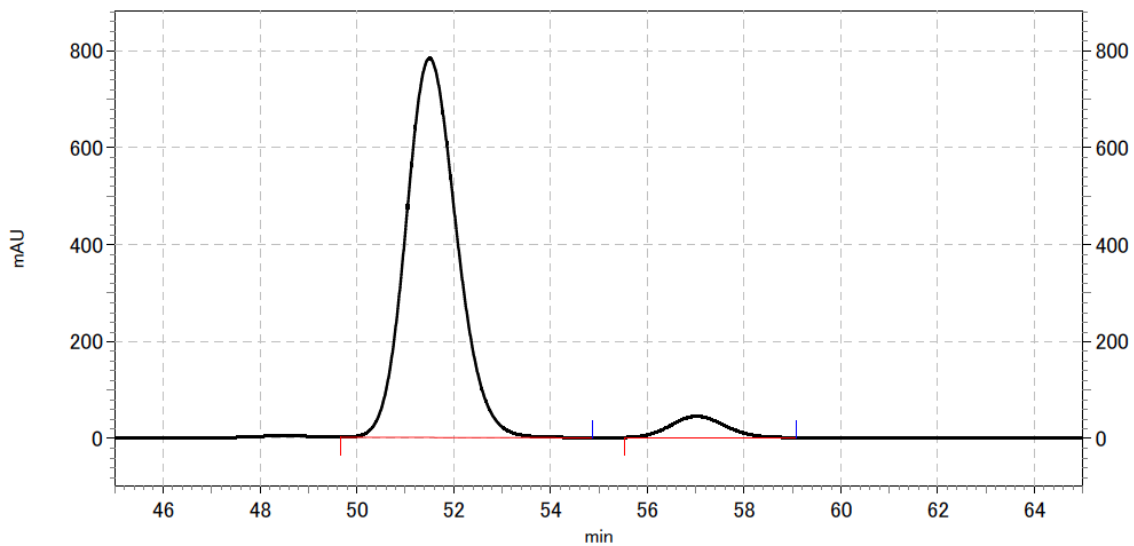

| Peak # | Retention time | Area      | Area % |
|--------|----------------|-----------|--------|
| 1      | 51.500         | 228338153 | 94.233 |
| 2      | 57.020         | 13973153  | 5.767  |

### Racemate

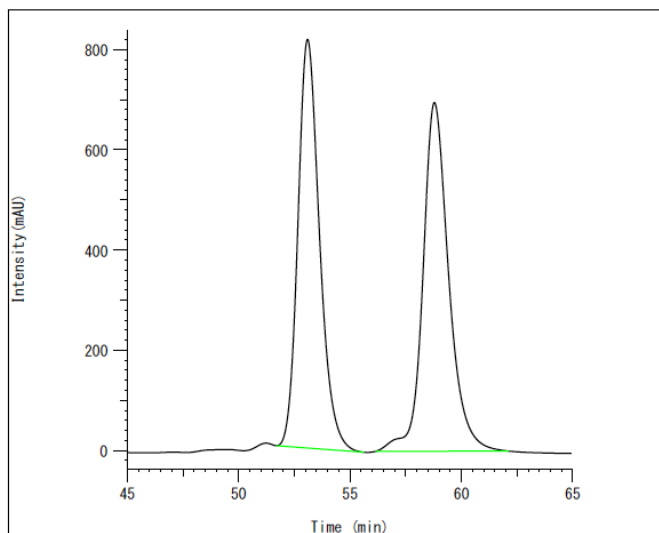

5430 Diode Array Detector SampleID:1 kt-385-rac (Extract, 300nm) Repeat:1

| No. Compounds | RT     | Area      | Area%   |
|---------------|--------|-----------|---------|
| 1 Peak 1      | 53.093 | 54981235  | 49.457  |
| 2 Peak 2      | 58.793 | 56188199  | 50.543  |
|               |        | 111169434 | 100.000 |

**3ag**

CHIRALPAK® IF-3 column, *n*-hexane/*i*-PrOH = 7/3, flow rate = 0.5 mL/min,  $t_{major} = 35.78$  min,  $t_{minor} = 41.22$  min.

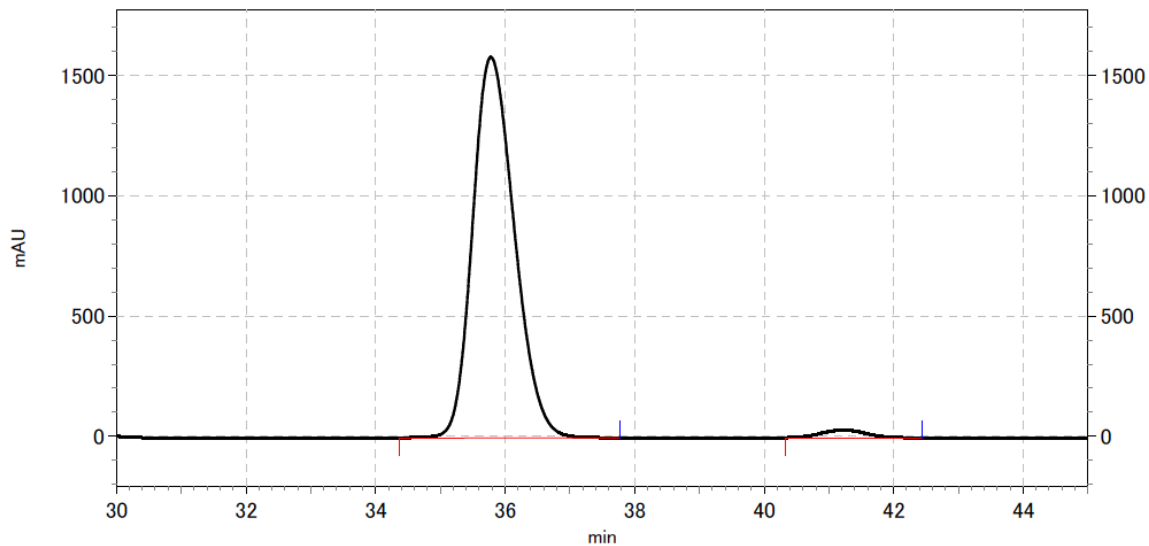

| Peak # | Retention time | Area      | Area % |
|--------|----------------|-----------|--------|
| 1      | 35.780         | 284280000 | 97.797 |
| 2      | 41.227         | 6403619   | 2.203  |

**Racemate**

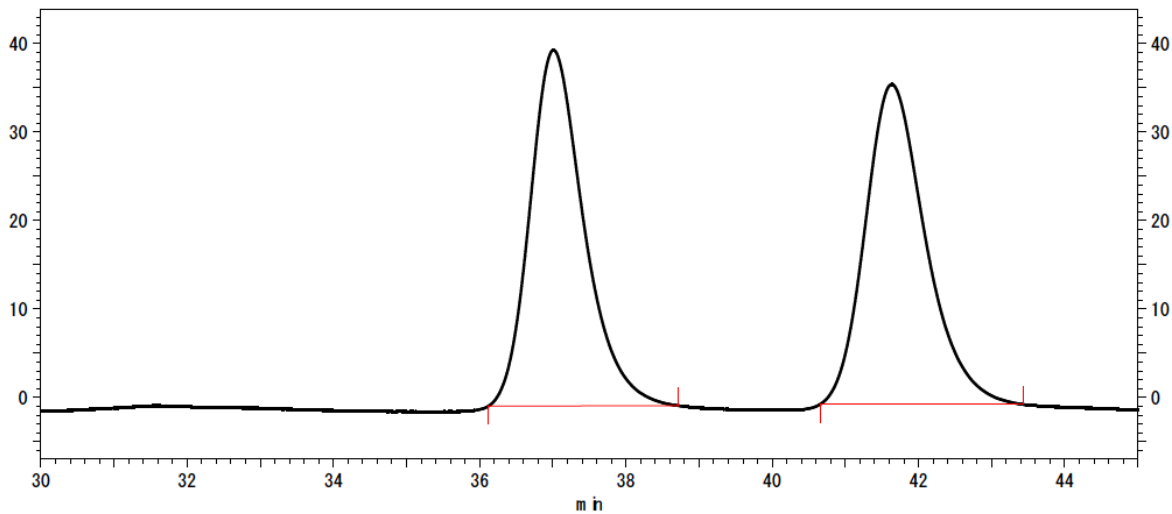

| Peak # | Retention time | Area    | Area % |
|--------|----------------|---------|--------|
| 1      | 37.007         | 8273810 | 49.894 |
| 2      | 41.640         | 8308941 | 50.106 |

### 3ah

CHIRALPAK® IF-3 column, *n*-hexane/*i*-PrOH = 7/3, flow rate = 0.5 mL/min,  $t_{\text{major}} = 26.65$  min,  $t_{\text{minor}} = 33.35$  min.

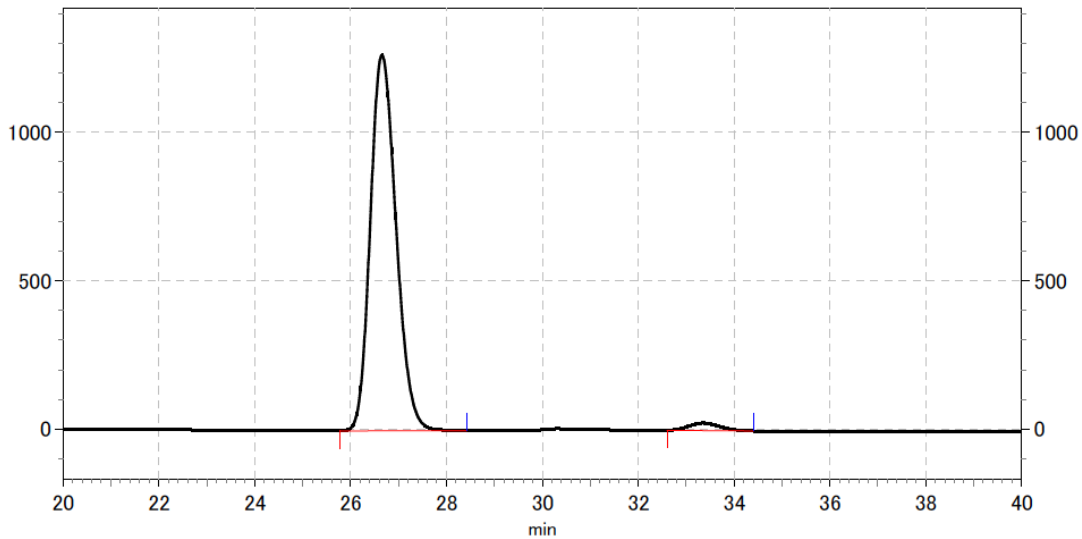

| Peak # | Retention time | Area      | Area % |
|--------|----------------|-----------|--------|
| 1      | 26.653         | 188900469 | 97.548 |
| 2      | 33.353         | 4747361   | 2.452  |

### Racemate

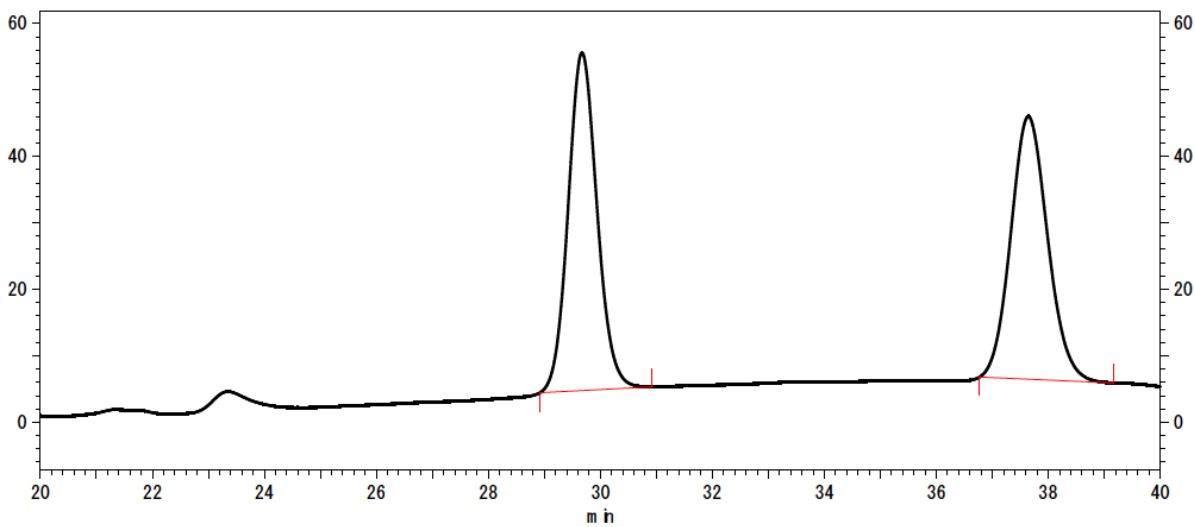

| Peak # | Retention time | Area    | Area % |
|--------|----------------|---------|--------|
| 1      | 29.673         | 7285650 | 50.151 |
| 2      | 37.640         | 7241802 | 49.849 |

**3ai**

CHIRALPAK® IF-3 column, *n*-hexane/*i*-PrOH = 7/3, flow rate = 0.5 mL/min,  $t_{\text{major}} = 46.81$  min,  $t_{\text{minor}} = 50.88$  min.

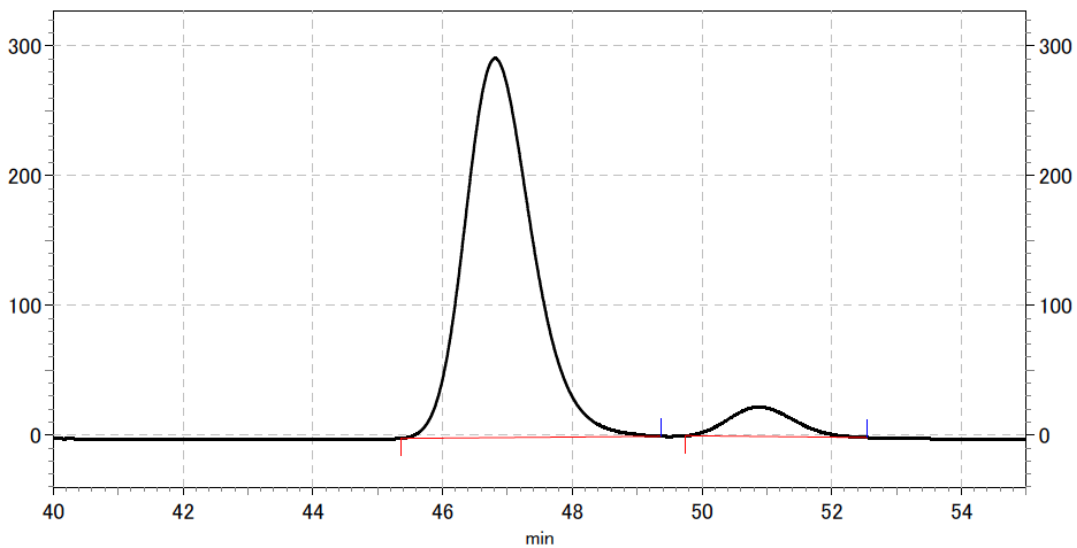

| Peak # | Retention time | Area     | Area % |
|--------|----------------|----------|--------|
| 1      | 46.813         | 84596180 | 92.926 |
| 2      | 50.887         | 6439471  | 7.074  |

**Racemate**

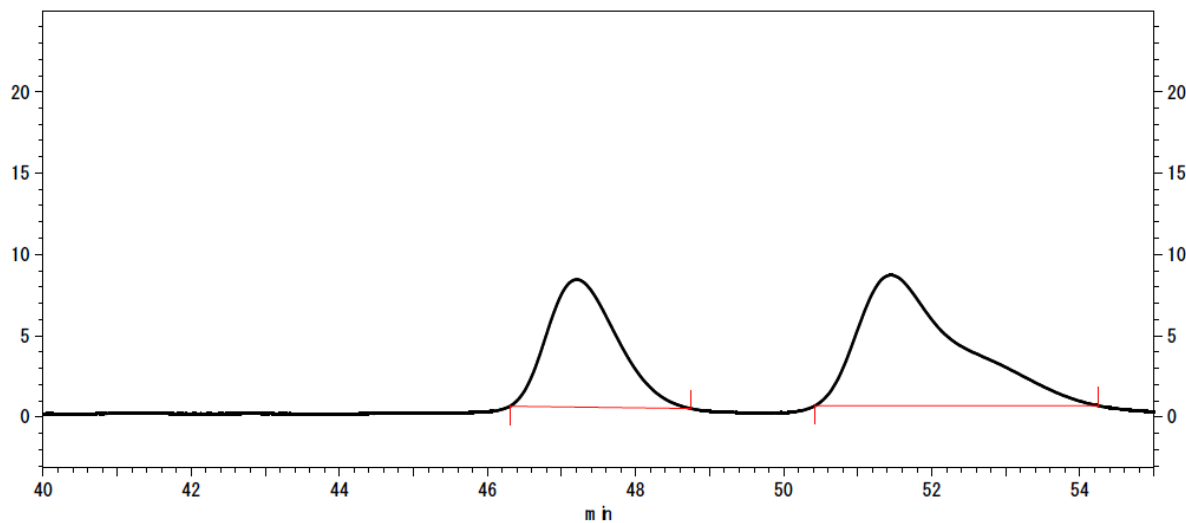

| Peak # | Retention time | Area    | Area % |
|--------|----------------|---------|--------|
| 1      | 47.207         | 2037797 | 40.009 |
| 2      | 51.447         | 3055582 | 59.991 |

**3bj**

CHIRALPAK® IF-3 column, *n*-hexane/*i*-PrOH = 7/3, flow rate = 0.5 mL/min,  $t_{\text{major}} = 51.28$  min,  $t_{\text{minor}} = 57.66$  min.

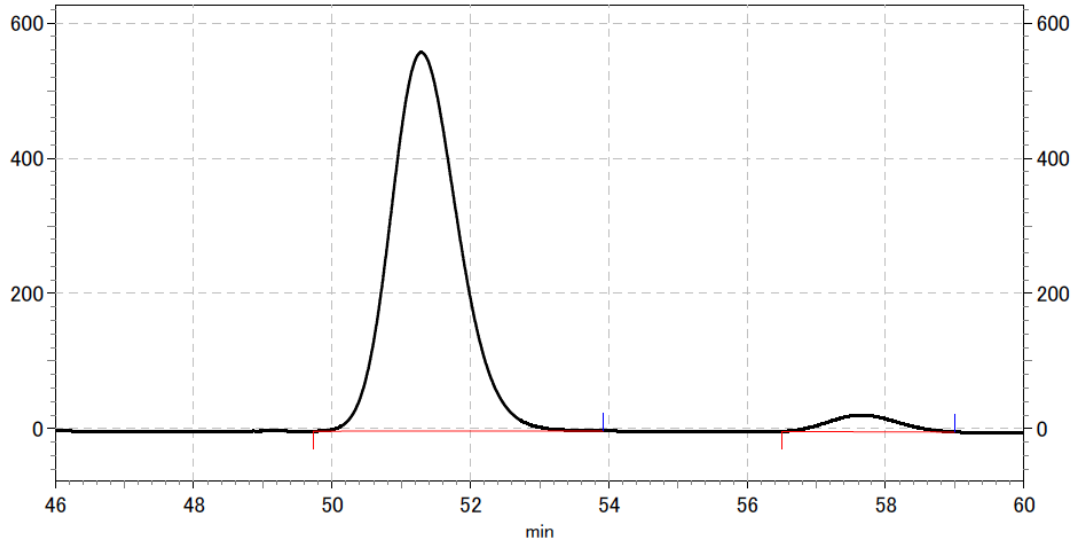

| Peak # | Retention time | Area      | Area % |
|--------|----------------|-----------|--------|
| 1      | 51.287         | 152842046 | 95.678 |
| 2      | 57.660         | 6904746   | 4.322  |

**Racemate**

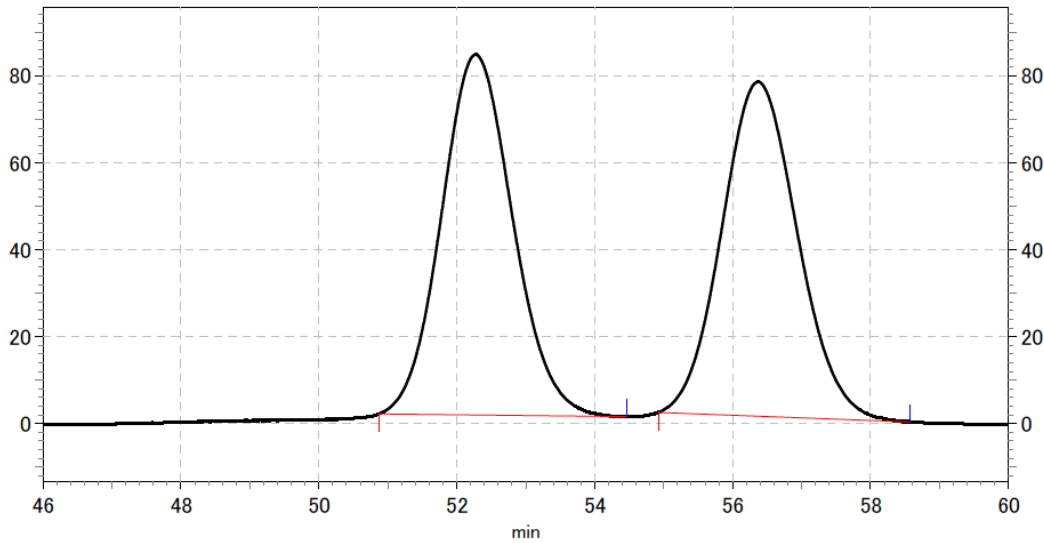

| Peak # | Retention time | Area     | Area % |
|--------|----------------|----------|--------|
| 1      | 52.273         | 23852462 | 50.383 |
| 2      | 56.373         | 23489518 | 49.617 |



**3bk**

CHIRALPAK® IF-3 column, *n*-hexane/*i*-PrOH = 7/3, flow rate = 0.5 mL/min,  $t_{\text{major}} = 35.06$  min,  $t_{\text{minor}} = 41.86$  min.

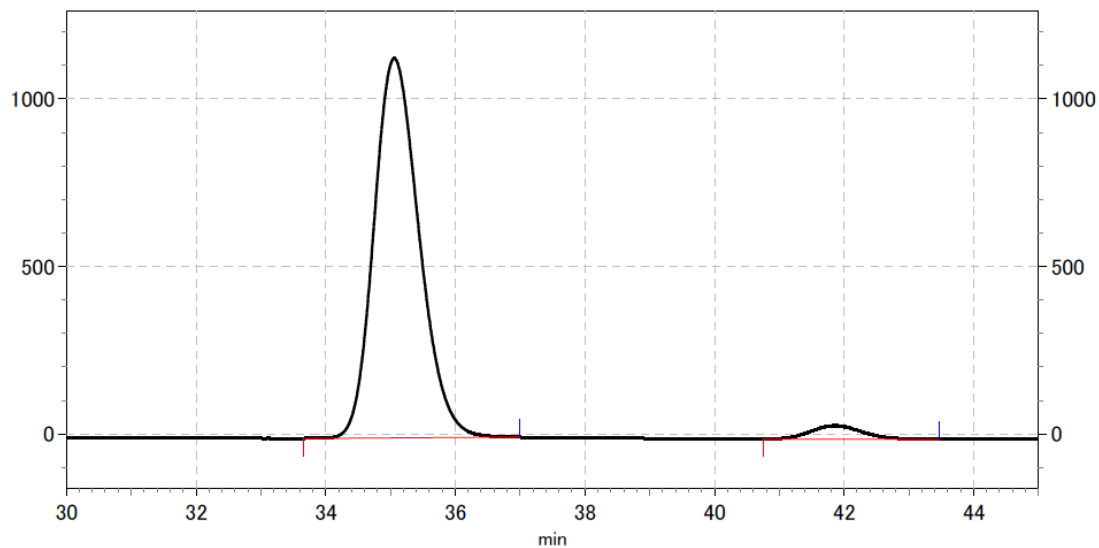

| Peak # | Retention time | Area      | Area % |
|--------|----------------|-----------|--------|
| 1      | 35.060         | 219025585 | 96.067 |
| 2      | 41.860         | 8967755   | 3.933  |

**Racemate**

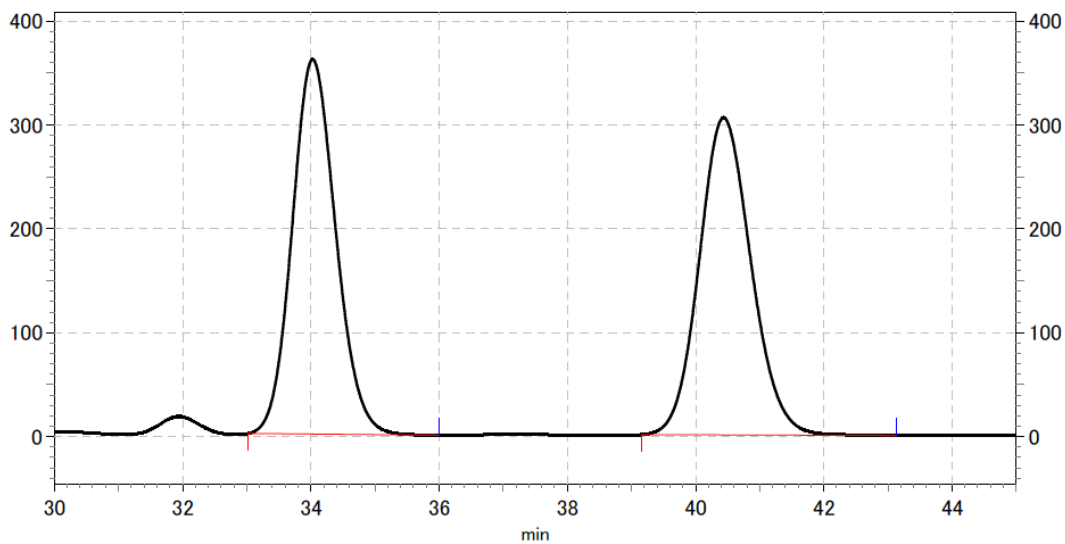

| Peak # | Retention time | Area     | Area % |
|--------|----------------|----------|--------|
| 1      | 34.027         | 68324317 | 49.820 |
| 2      | 40.440         | 68817597 | 50.180 |

**3bl**

CHIRALPAK® IF-3 column, *n*-hexane/*i*-PrOH = 7/3, flow rate = 0.5 mL/min,  $t_{\text{major}} = 33.94$  min,  $t_{\text{minor}} = 41.16$  min.

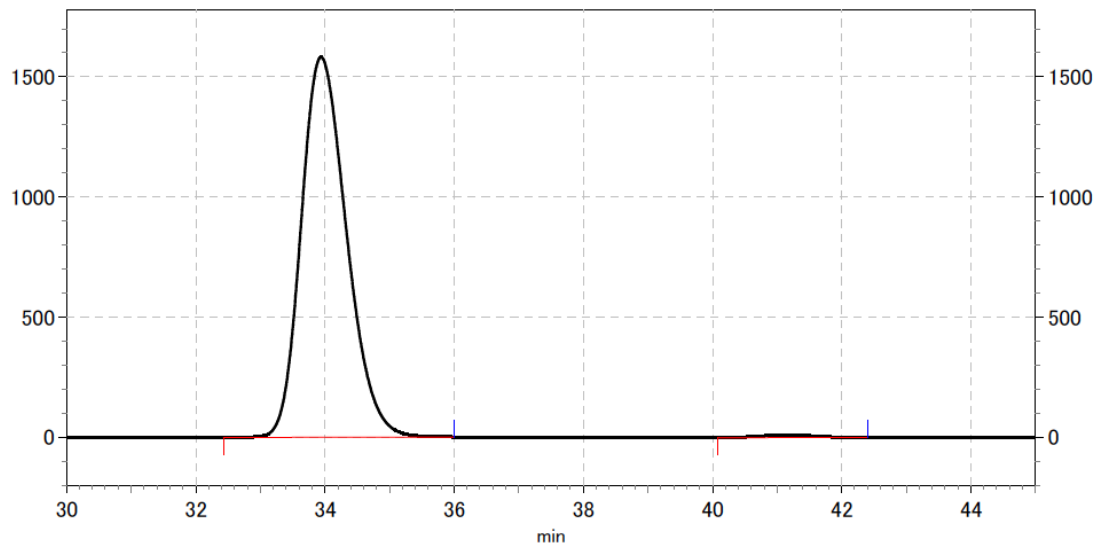

| Peak # | Retention time | Area      | Area % |
|--------|----------------|-----------|--------|
| 1      | 33.940         | 309416343 | 99.171 |
| 2      | 41.160         | 2585252   | 0.829  |

**Racemate**

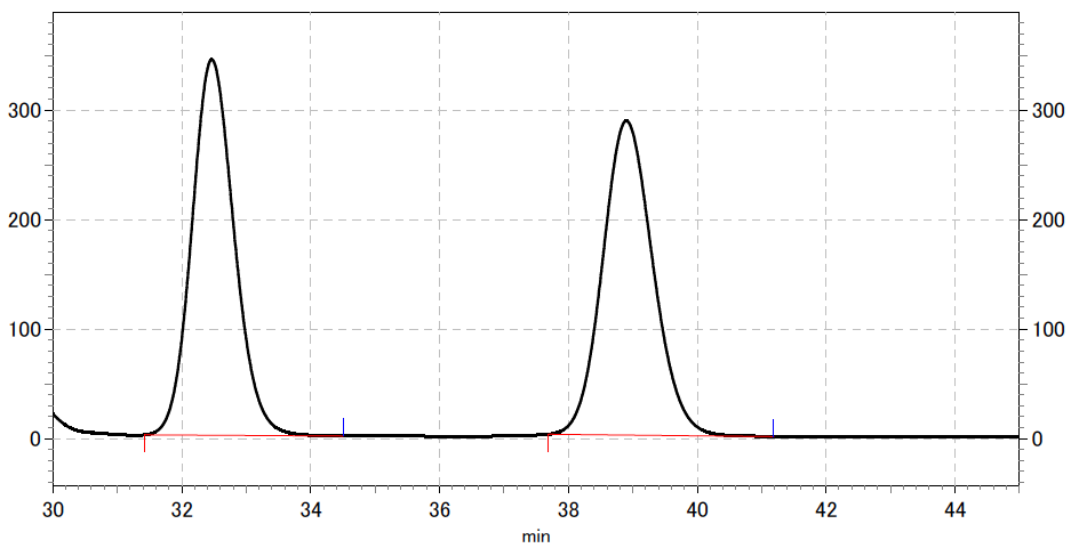

| Peak # | Retention time | Area     | Area % |
|--------|----------------|----------|--------|
| 1      | 32.467         | 62900764 | 50.138 |
| 2      | 38.900         | 62555295 | 49.862 |

### 3bm

CHIRALPAK® IA-3 column, *n*-hexane/*i*-PrOH = 85/15, flow rate = 0.5 mL/min,  $t_{\text{major}} = 96.10$  min,  $t_{\text{minor}} = 88.00$  min.

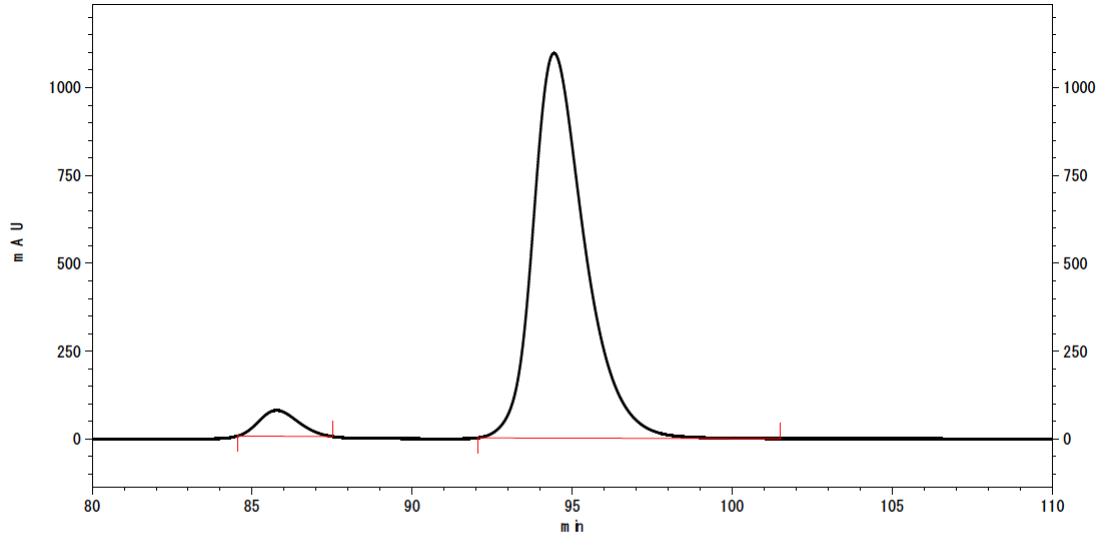

| Peak # | Retention time | Area      | Area%  |
|--------|----------------|-----------|--------|
| 1      | 85.760         | 24891460  | 4.810  |
| 2      | 94.433         | 492613603 | 95.190 |

### Racemate

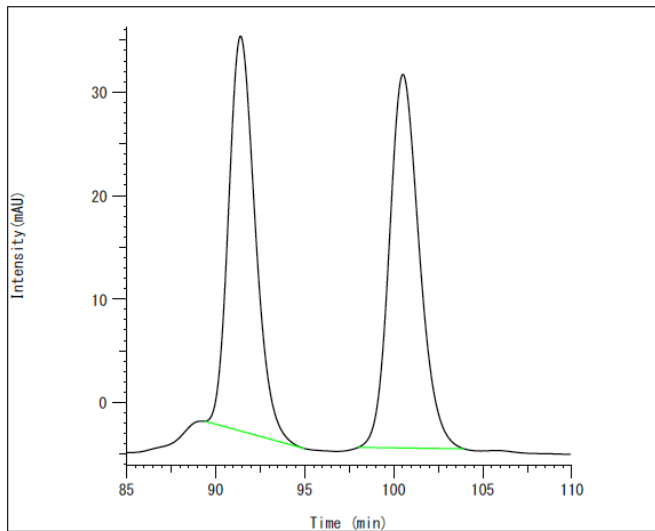

5430 Diode Array Detector SampleID:1 kt-268-rac (Extract, 300nm) Repeat:1

| No. Compounds | RT      | Area    | Area%   |
|---------------|---------|---------|---------|
| 1 Peak 1      | 91.407  | 3954316 | 48.343  |
| 2 Peak 2      | 100.520 | 4225466 | 51.657  |
|               |         | 8179783 | 100.000 |

### 3bn

CHIRALPAK® IF-3 column, *n*-hexane/*i*-PrOH = 7/3, flow rate = 0.5 mL/min,  $t_{\text{major}} = 44.12$  min,  $t_{\text{minor}} = 59.86$  min.

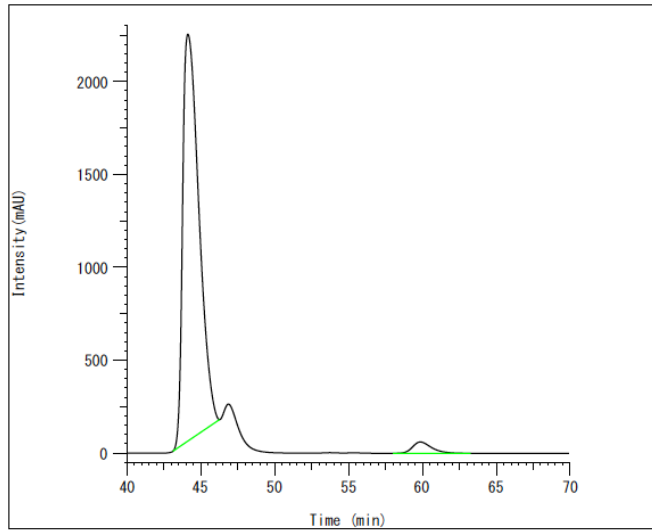

5430 Diode Array Detector SampleID:1 UNK001 (Extract, 300nm) Repeat:1

| No. Compounds | RT     | Area      | Area%   |
|---------------|--------|-----------|---------|
| 1 Peak 1      | 44.120 | 167025788 | 96.796  |
| 2 Peak 2      | 59.860 | 5528738   | 3.204   |
|               |        | 172554526 | 100.000 |

### Racemate

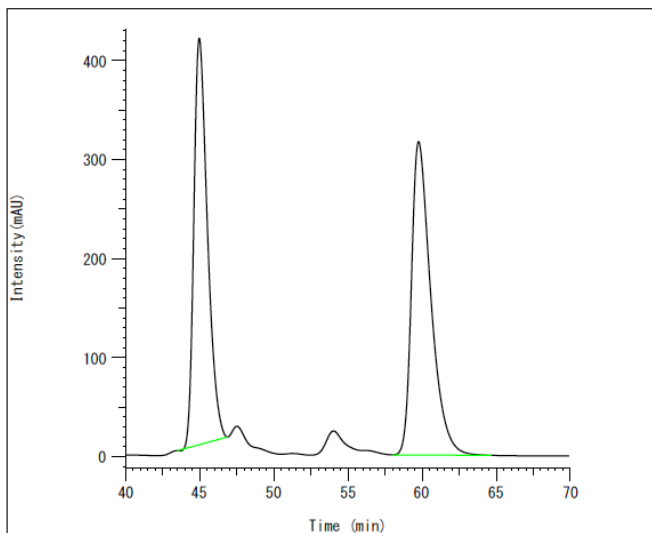

5430 Diode Array Detector SampleID:1 kt-435-rac-2 (Extract, 300nm) Repeat:1

| No. Compounds | RT     | Area     | Area%   |
|---------------|--------|----------|---------|
| 1 Peak 1      | 44.960 | 26106229 | 47.597  |
| 2 Peak 2      | 59.760 | 28742303 | 52.403  |
|               |        | 54848532 | 100.000 |

**3bo**

CHIRALPAK® IF-3 column, *n*-hexane/*i*-PrOH = 7/3, flow rate = 0.5 mL/min,  $t_{major} = 44.12$  min,  $t_{minor} = 59.86$  min.

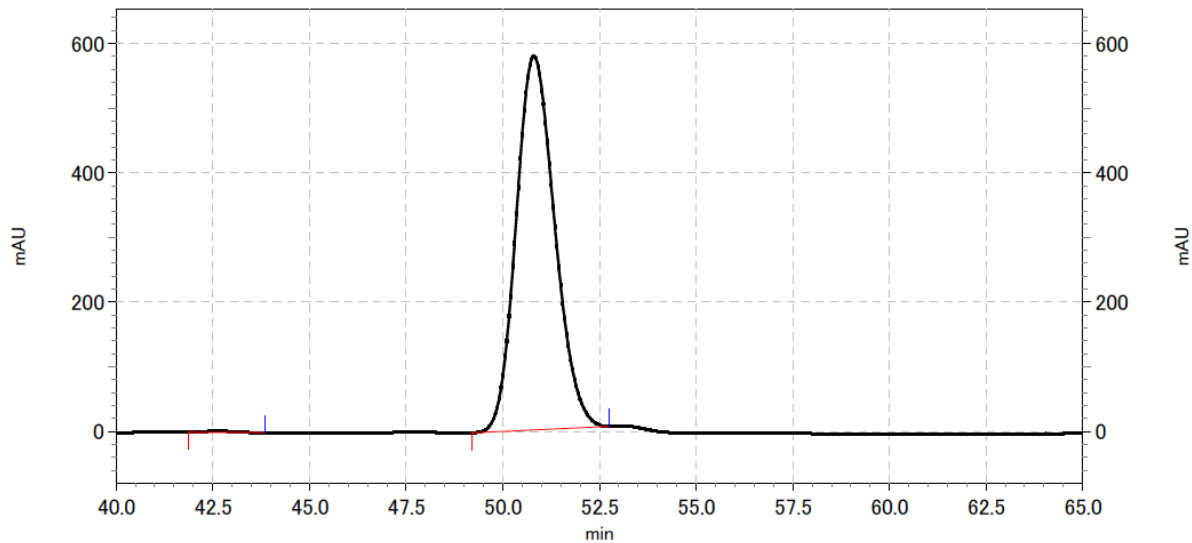

| Peak # | Retention time | Area      | Area % |
|--------|----------------|-----------|--------|
| 1      | 42.567         | 507304    | 0.315  |
| 2      | 50.807         | 160630543 | 99.685 |

**Racemate**

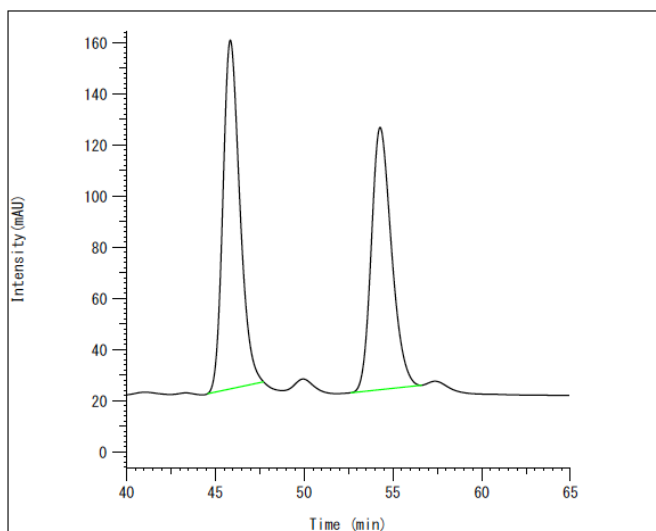

5430 Diode Array Detector SampleID:1 kt-604 rac (Extract, 300nm) Repeat:1

| No. Compounds | RT     | Area     | Area%   |
|---------------|--------|----------|---------|
| 1 Peak 1      | 45.847 | 9022375  | 52.688  |
| 2 Peak 2      | 54.287 | 8101921  | 47.312  |
|               |        | 17124295 | 100.000 |

### 3bp

CHIRALPAK® IA-3 column, *n*-hexane/*i*-PrOH = 7/3, flow rate = 0.5 mL/min,  $t_{\text{major}} = 30.78$  min,  $t_{\text{minor}} = 26.03$  min.

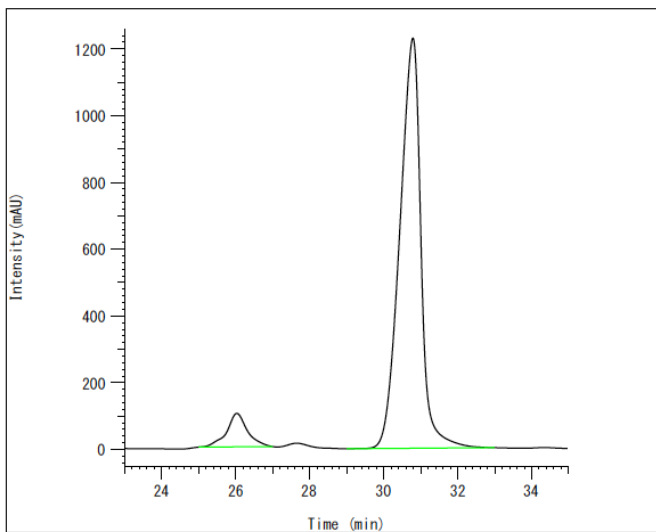

5430 Diode Array Detector SampleID:1 kt-tu-l-o-Me (Extract, 300nm) Repeat:1

| No. Compounds | RT     | Area     | Area%   |
|---------------|--------|----------|---------|
| 1 Peak 1      | 26.033 | 3902409  | 7.416   |
| 2 Peak 2      | 30.787 | 48722086 | 92.584  |
|               |        | 52624495 | 100.000 |

### Racemate

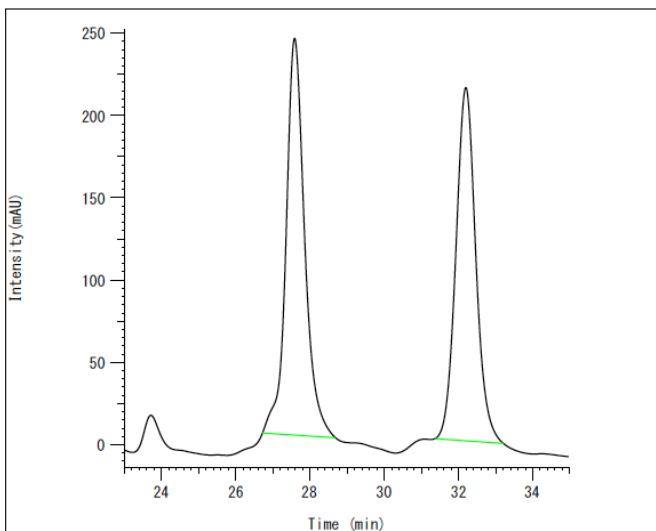

5430 Diode Array Detector SampleID:1 kt-603 rac (Extract, 300nm) Repeat:1

| No. Compounds | RT     | Area     | Area%   |
|---------------|--------|----------|---------|
| 1 Peak 1      | 27.587 | 8394856  | 51.298  |
| 2 Peak 2      | 32.200 | 7969869  | 48.702  |
|               |        | 16364725 | 100.000 |

**3aq**

CHIRALPAK® IA-3 column, *n*-hexane/*i*-PrOH = 7/3, flow rate = 0.5 mL/min,  $t_{\text{major}} = 34.50$  min,  $t_{\text{minor}} = 39.20$  min.

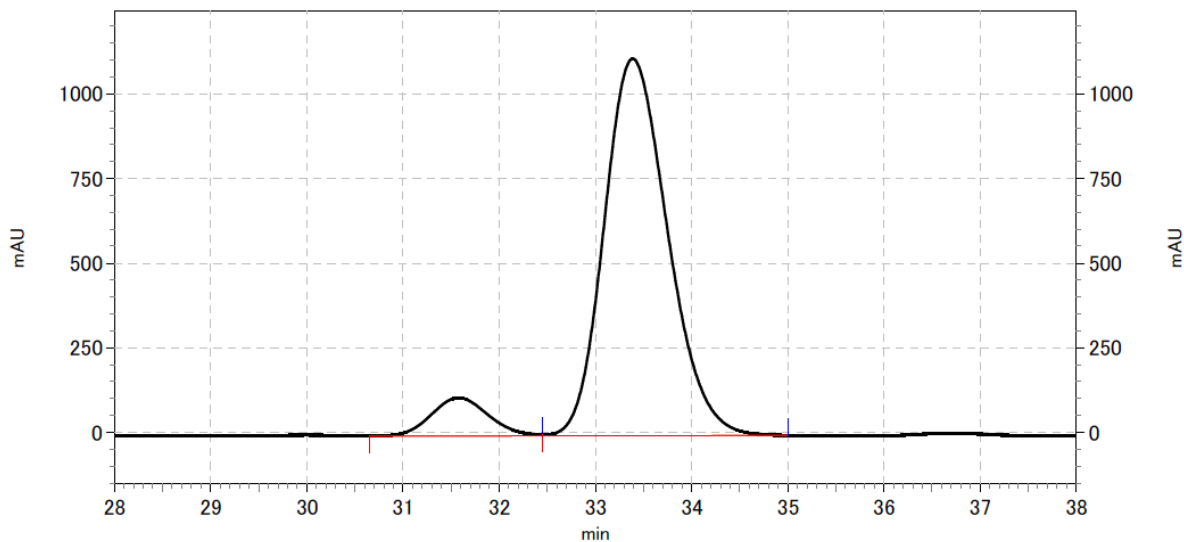

| Peak # | Retention time | Area      | Area % |
|--------|----------------|-----------|--------|
| 1      | 31.573         | 18532309  | 8.320  |
| 2      | 33.387         | 204204871 | 91.680 |

**Racemate**

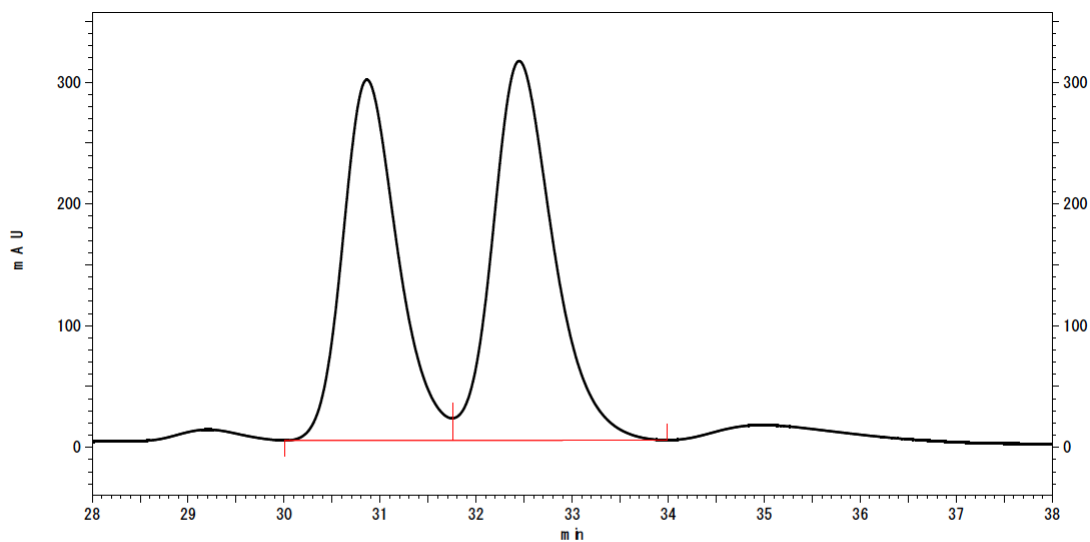

| Peak # | Retention time | Area     | Area%  |
|--------|----------------|----------|--------|
| 1      | 30.860         | 47246484 | 46.294 |
| 2      | 32.447         | 54811228 | 53.706 |

3jr

CHIRALPAK® IF-3 column, *n*-hexane/*i*-PrOH = 7/3, flow rate = 0.5 mL/min,  $t_{\text{major}} = 80.74$  min,  $t_{\text{minor}} = 87.88$  min.

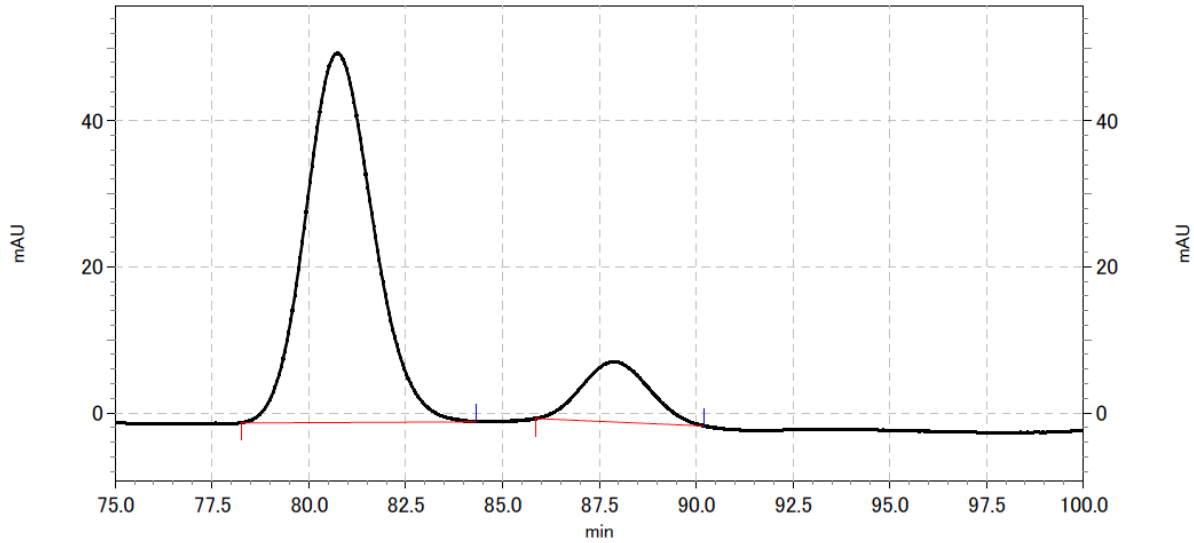

| Peak # | Retention time | Area     | Area % |
|--------|----------------|----------|--------|
| 1      | 80.740         | 24509992 | 86.012 |
| 2      | 87.887         | 3986024  | 13.988 |

Racemate

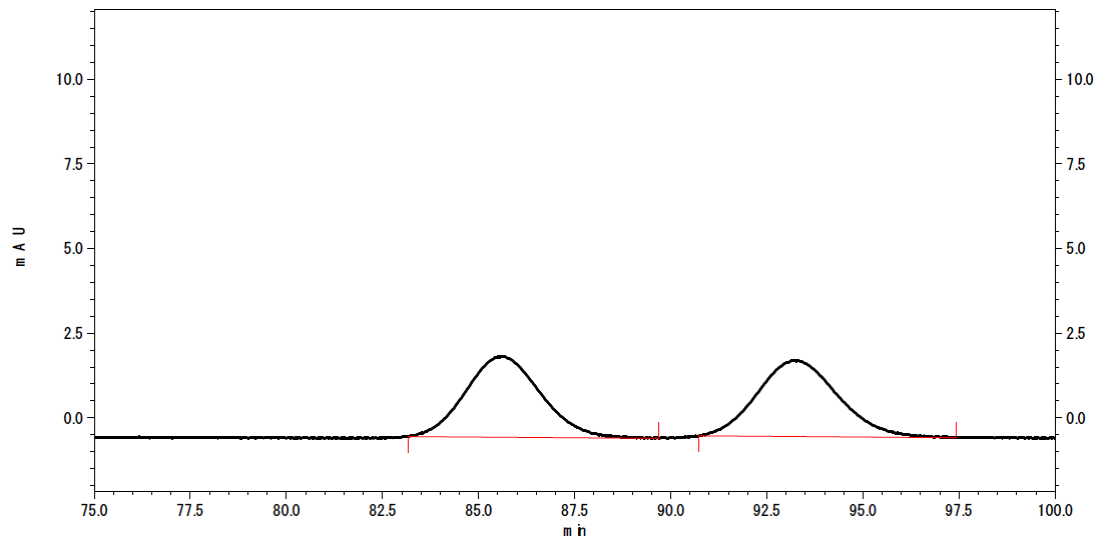

| Peak # | Retention time | Area    | Area%  |
|--------|----------------|---------|--------|
| 1      | 85.600         | 1298412 | 49.727 |
| 2      | 93.207         | 1312654 | 50.273 |



3cj

CHIRALPAK® IF-3 column, *n*-hexane/*i*-PrOH = 7/3, flow rate = 0.5 mL/min,  $t_{\text{major}} = 50.62$  min,  $t_{\text{minor}} = 54.48$  min.

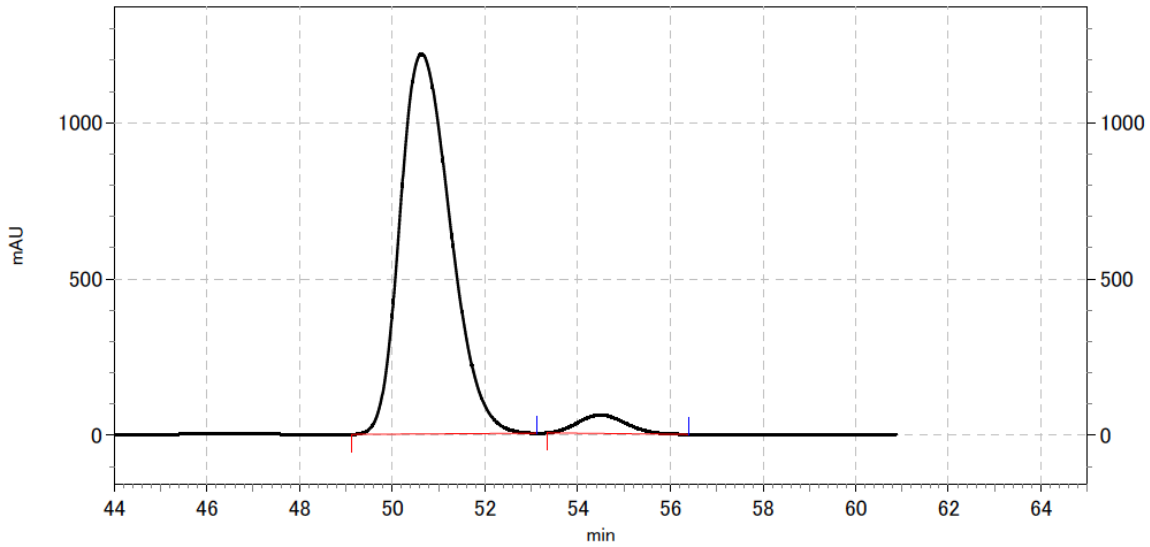

| Peak # | Retention time | Area      | Area % |
|--------|----------------|-----------|--------|
| 1      | 50.620         | 367245405 | 95.542 |
| 2      | 54.487         | 17135685  | 4.458  |

Racemate

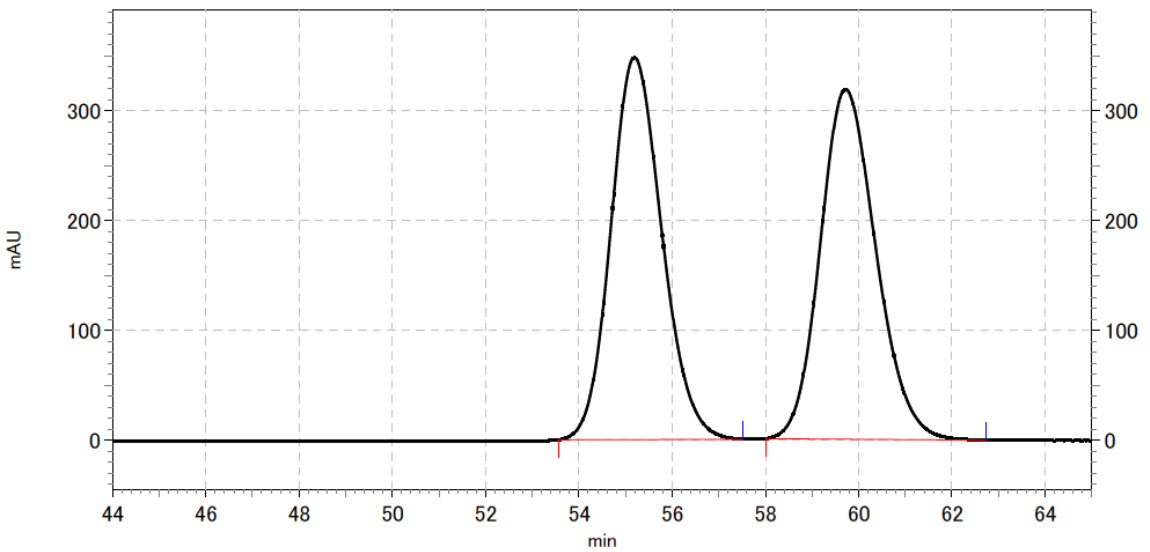

| Peak # | Retention time | Area      | Area % |
|--------|----------------|-----------|--------|
| 1      | 55.193         | 105806865 | 49.988 |
| 2      | 59.720         | 105856990 | 50.012 |

**3cl**

CHIRALPAK® IF-3 column, *n*-hexane/*i*-PrOH = 7/3, flow rate = 0.5 mL/min,  $t_{\text{major}} = 33.04$  min,  $t_{\text{minor}} = 38.38$  min.

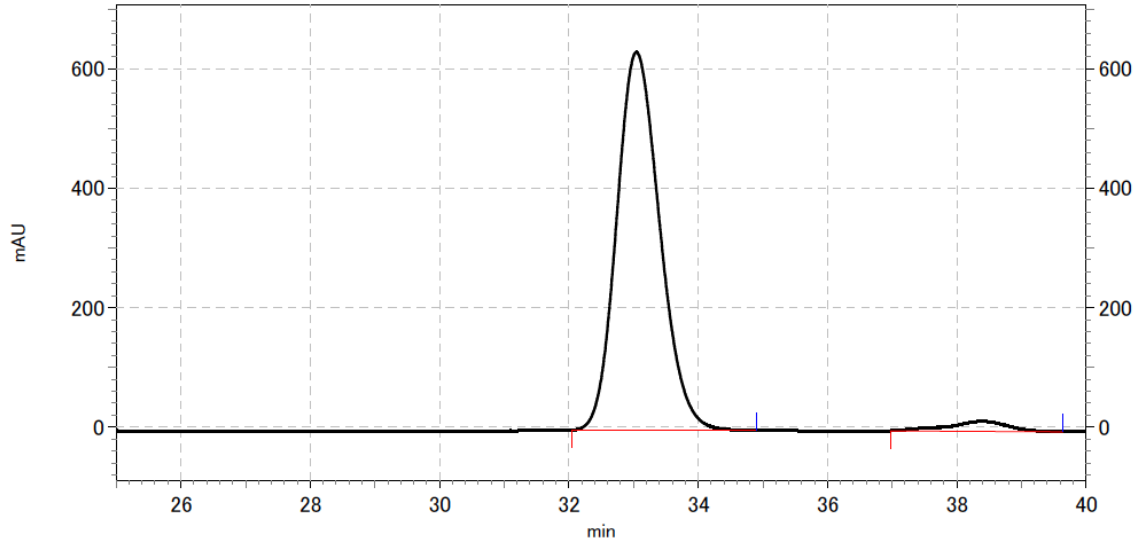

| Peak # | Retention time | Area      | Area % |
|--------|----------------|-----------|--------|
| 1      | 33.040         | 117479643 | 96.439 |
| 2      | 38.387         | 4337967   | 3.561  |

**Racemate**

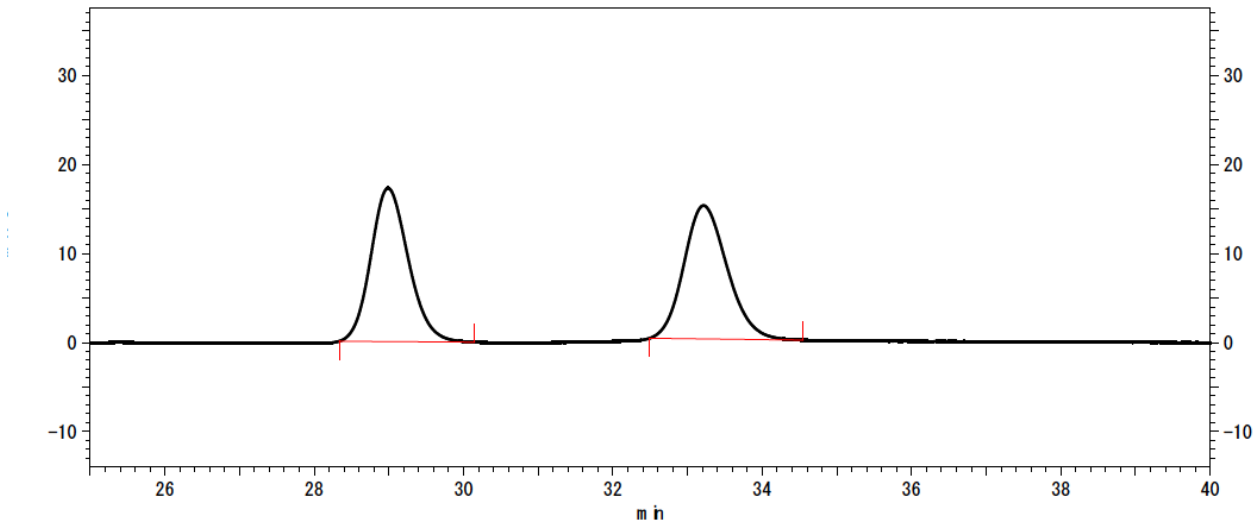

| Peak # | Retention time | Area    | Area % |
|--------|----------------|---------|--------|
| 1      | 28.987         | 2414092 | 49.912 |
| 2      | 33.213         | 2422645 | 50.088 |

### 3cm

CHIRALPAK® IA-3 column, *n*-hexane/*i*-PrOH = 85/15, flow rate = 0.5 mL/min,  $t_{\text{major}} = 88.33$  min,  $t_{\text{minor}} = 82.20$  min.

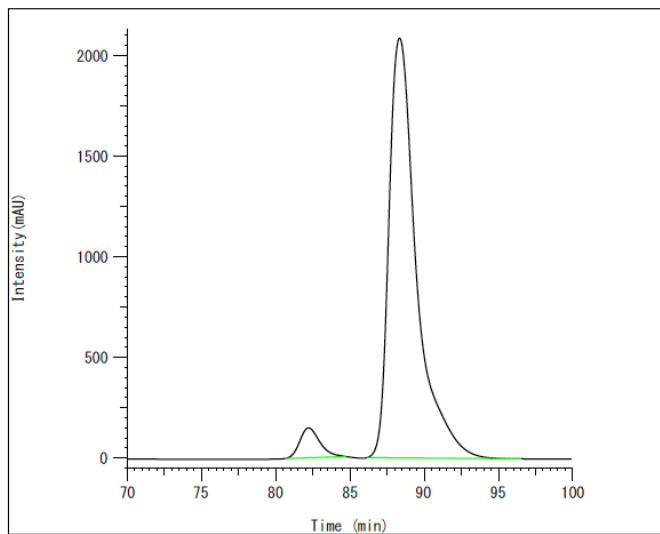

5430 Diode Array Detector SampleID:1 kt-479-Br-Ph pro (Extract, 300nm) Repeat:1

| No. Compounds | RT     | Area      | Area%   |
|---------------|--------|-----------|---------|
| 1 Peak 1      | 82.207 | 13896385  | 4.929   |
| 2 Peak 2      | 88.333 | 268011906 | 95.071  |
|               |        | 281908290 | 100.000 |

### Racemate

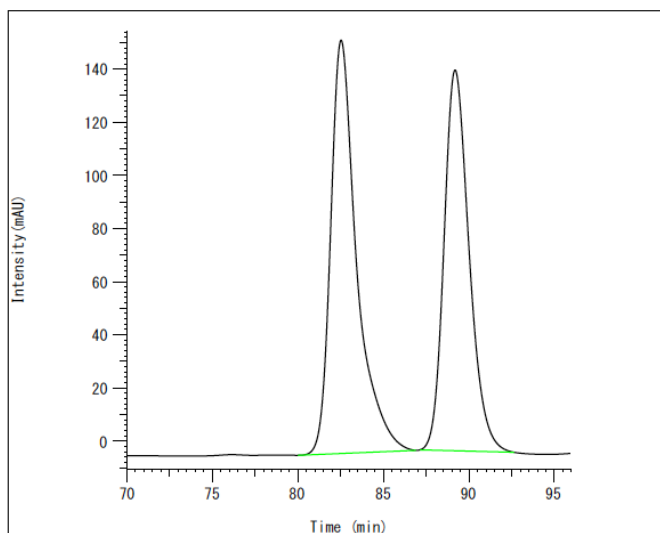

5430 Diode Array Detector SampleID:1 kt-366-rac-2 (Extract, 300nm) Repeat:1

| No. Compounds | RT     | Area     | Area%   |
|---------------|--------|----------|---------|
| 1 Peak 1      | 82.527 | 16434737 | 53.006  |
| 2 Peak 2      | 89.193 | 14570542 | 46.994  |
|               |        | 31005280 | 100.000 |

## 6. NMR spectra

3aa

<sup>1</sup>H NMR (400 MHz, CDCl<sub>3</sub>)

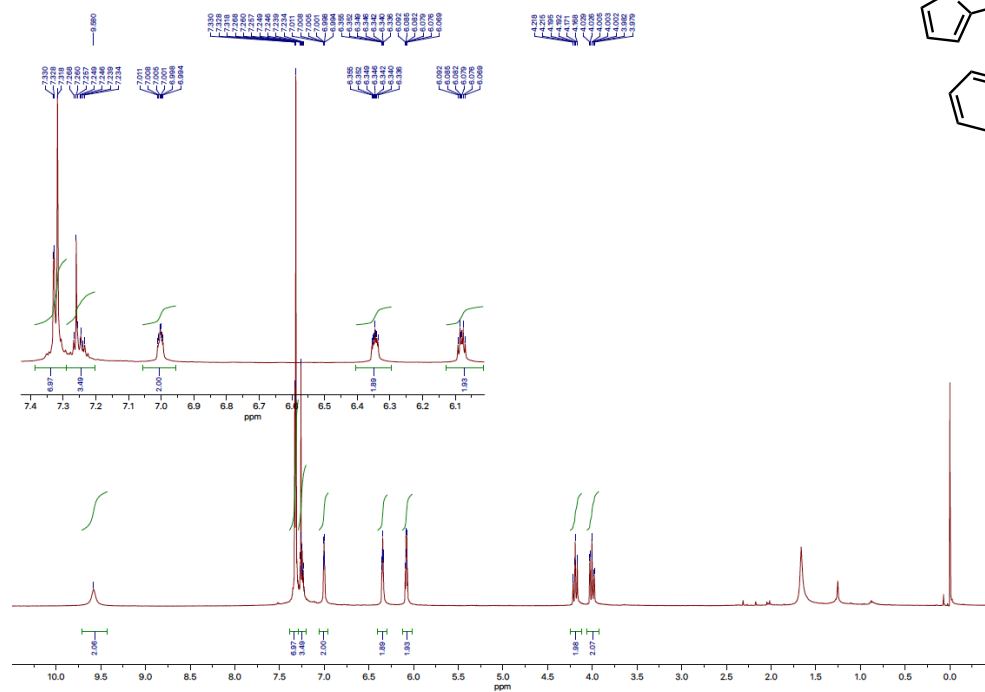

<sup>13</sup>C NMR (101 MHz, CDCl<sub>3</sub>)

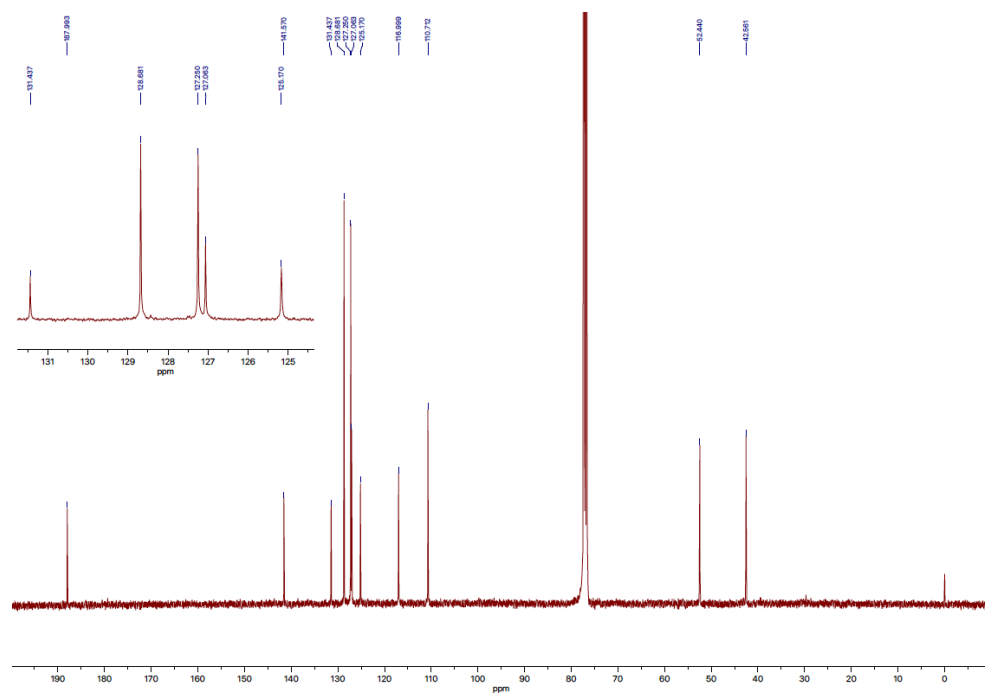

3ab

$^1\text{H}$  NMR (400 MHz,  $\text{CDCl}_3$ )

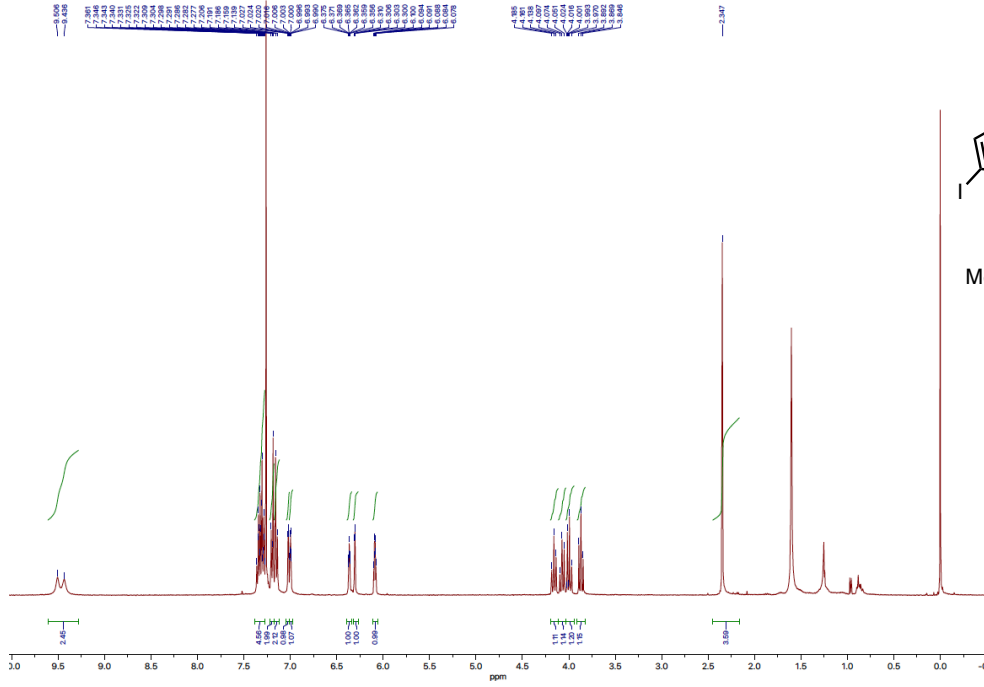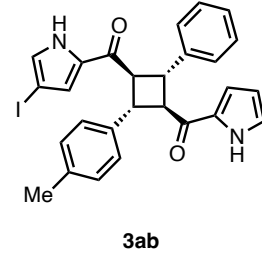

$^{13}\text{C}$  NMR (101 MHz,  $\text{CDCl}_3$ )

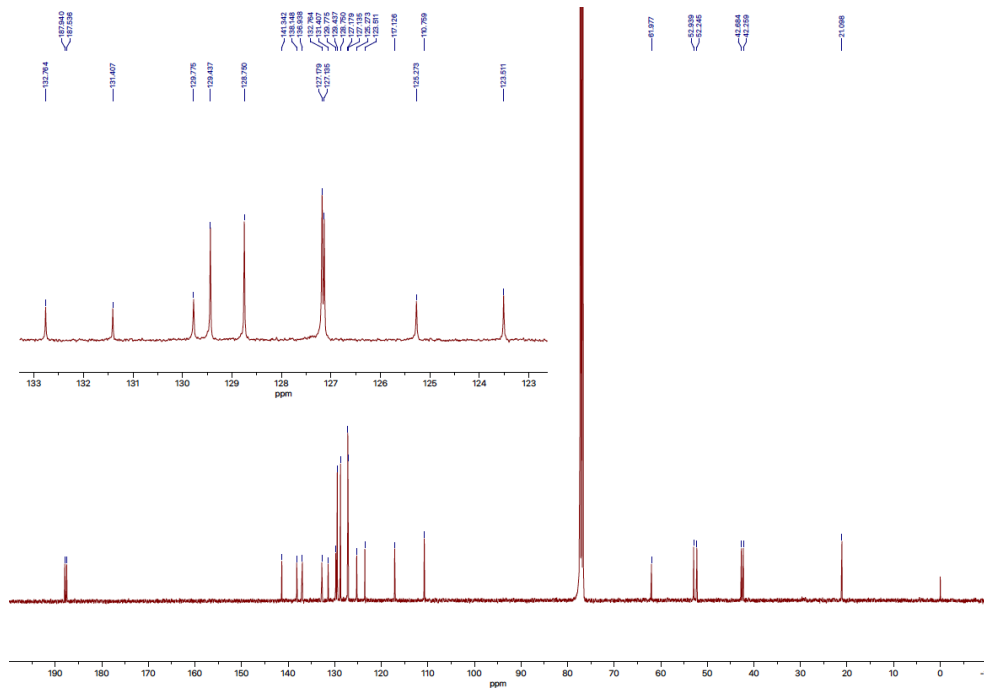

**3ac**

**<sup>1</sup>H NMR (400 MHz, CDCl<sub>3</sub>)**

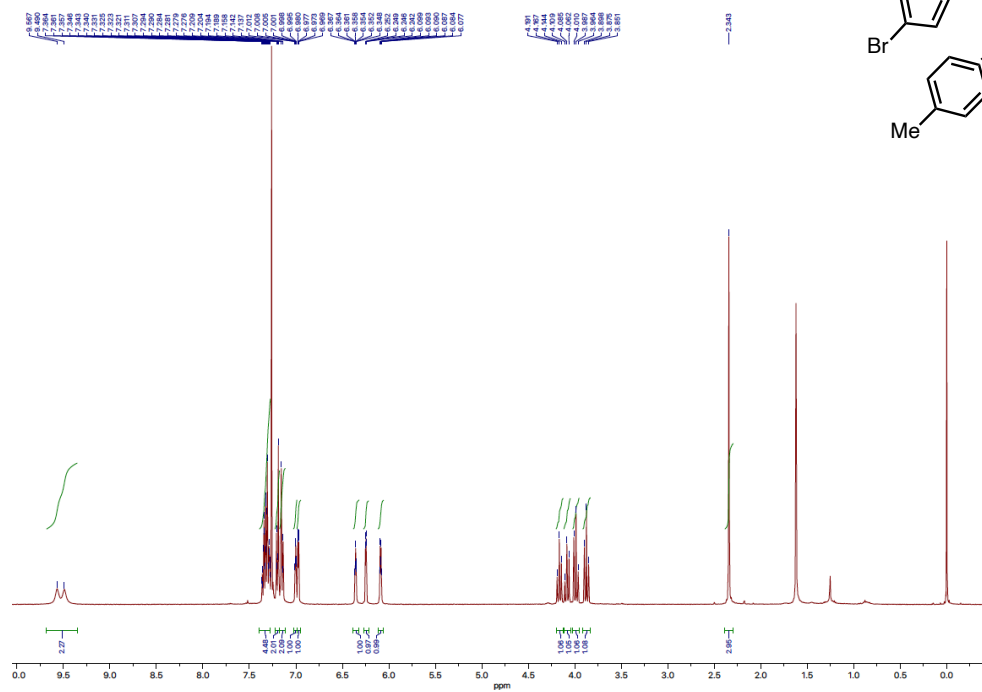

**<sup>13</sup>C NMR (101 MHz, CDCl<sub>3</sub>)**

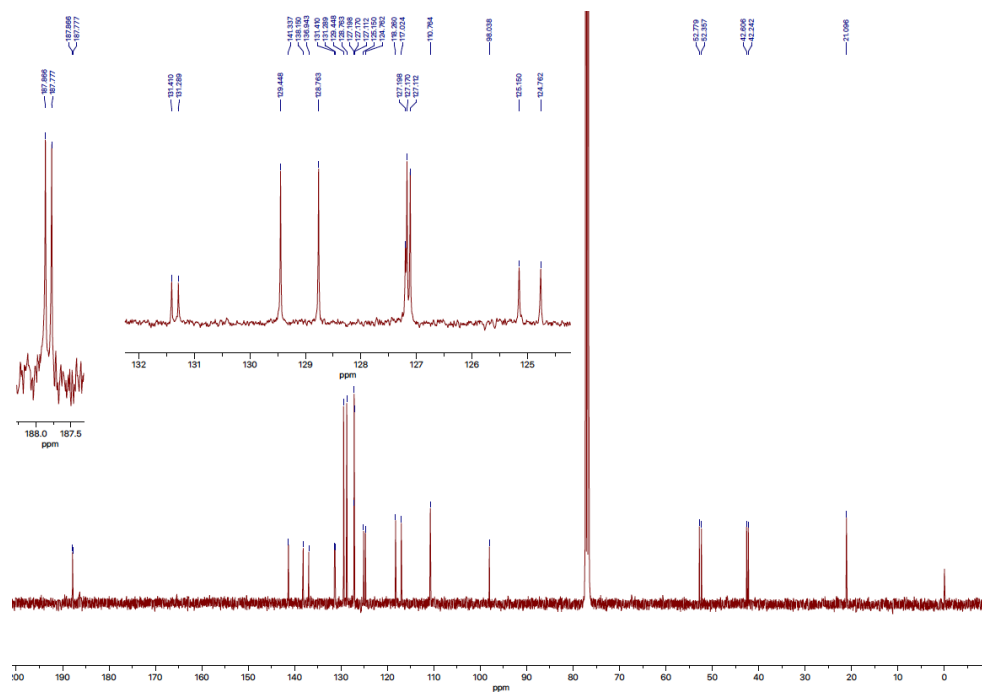



3ae

<sup>1</sup>H NMR (400 MHz, CDCl<sub>3</sub>)

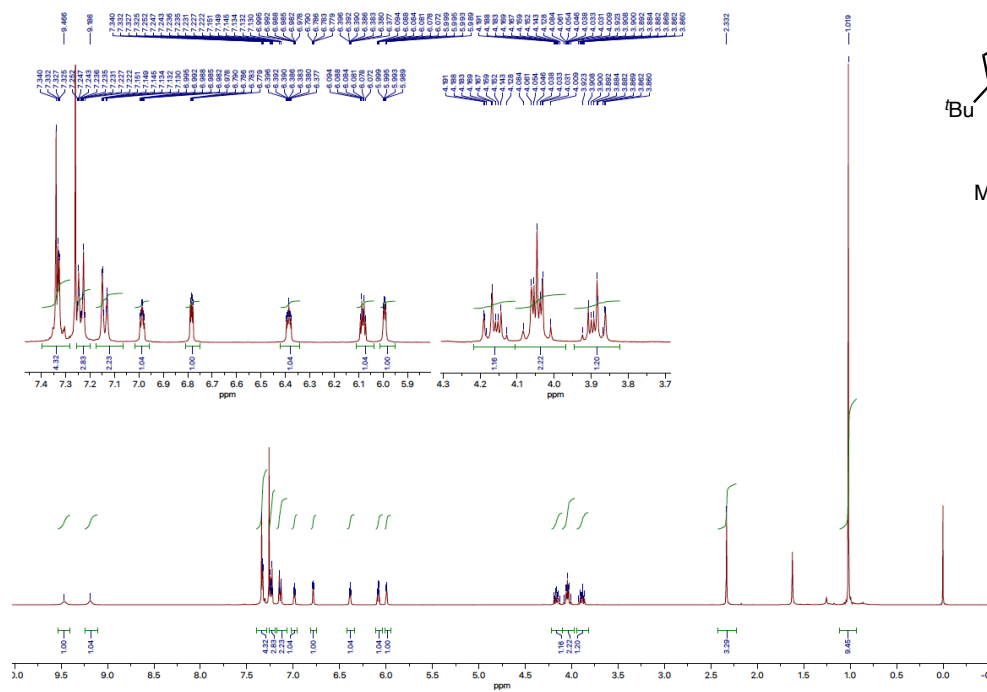

<sup>13</sup>C NMR (101 MHz, CDCl<sub>3</sub>)

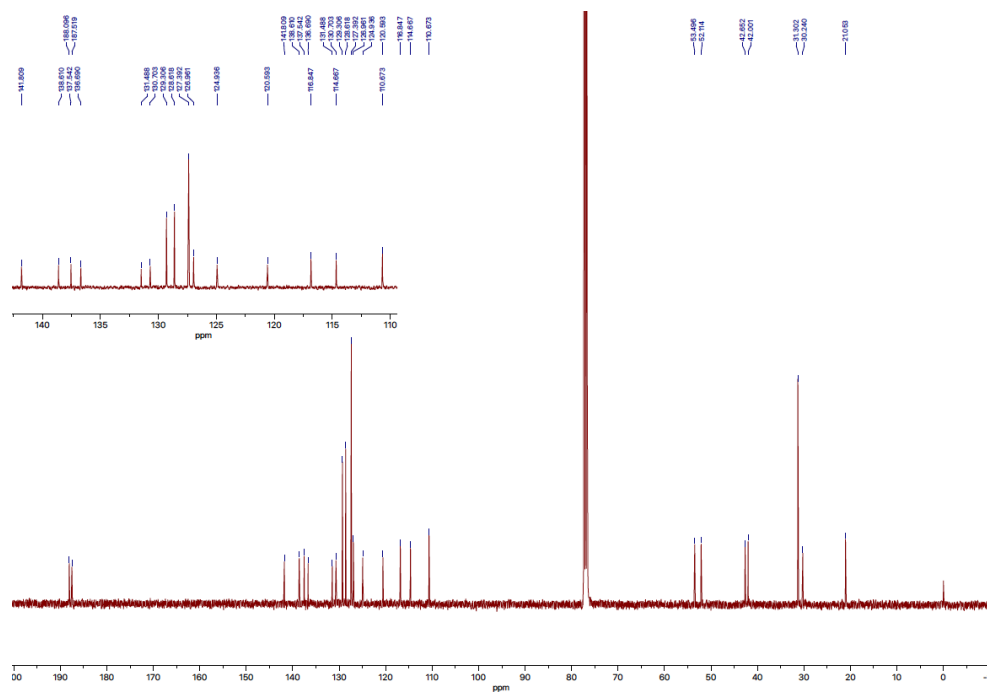





3ag

$^1\text{H}$  NMR (400 MHz,  $\text{CDCl}_3$ )

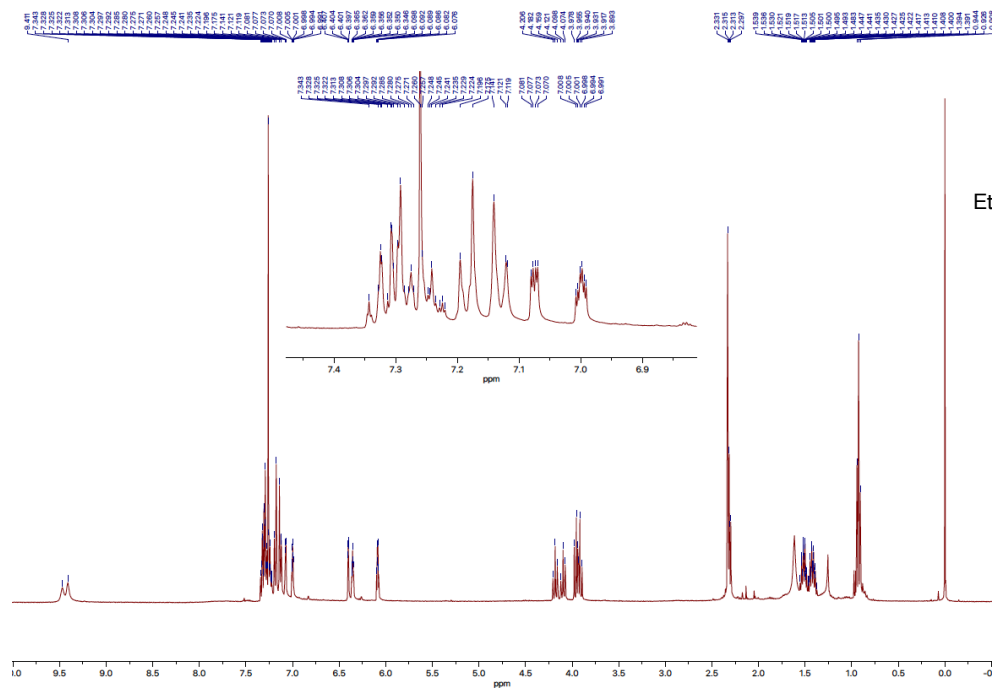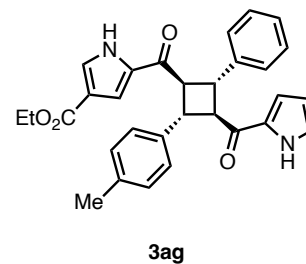

$^{13}\text{C}$  NMR (101 MHz,  $\text{CDCl}_3$ )

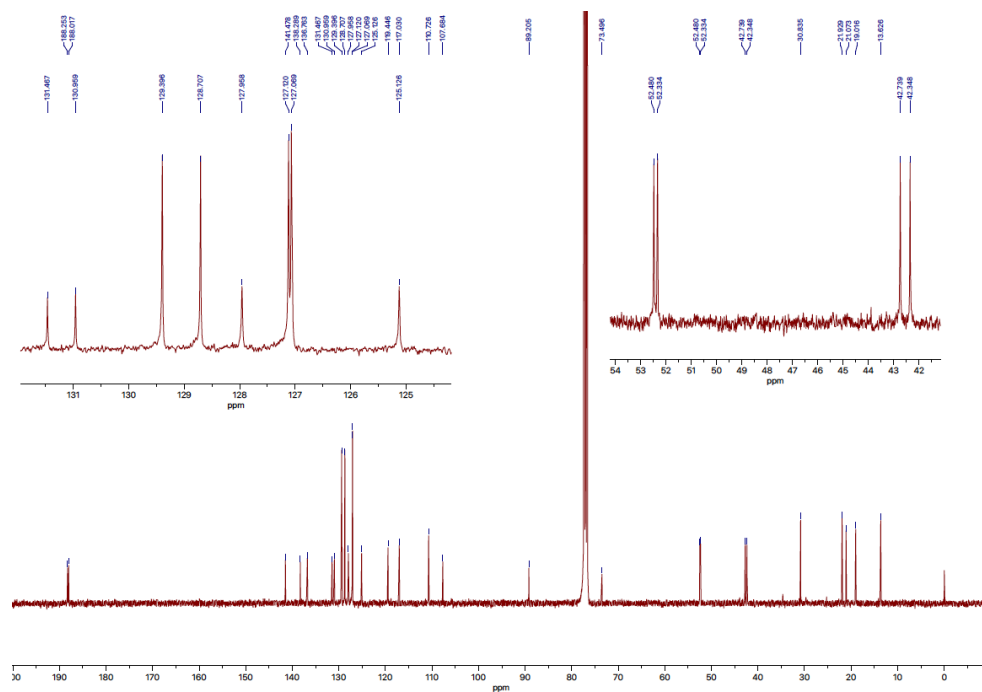

3ah

$^1\text{H}$  NMR (400 MHz,  $\text{CDCl}_3$ )

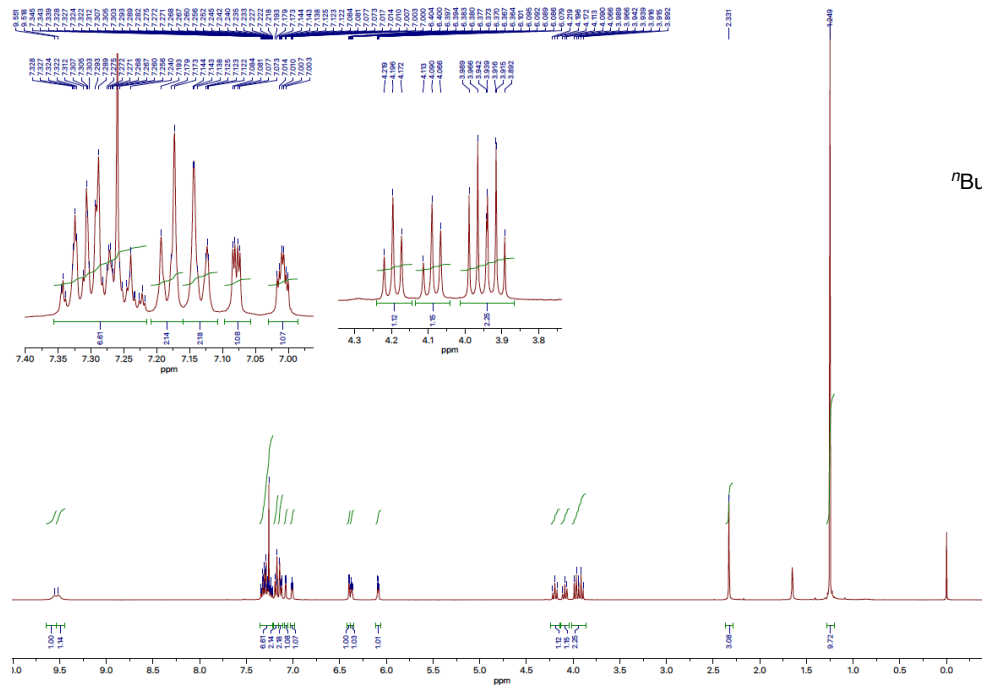

**3ai**

**<sup>1</sup>H NMR (400 MHz, CDCl<sub>3</sub>)**

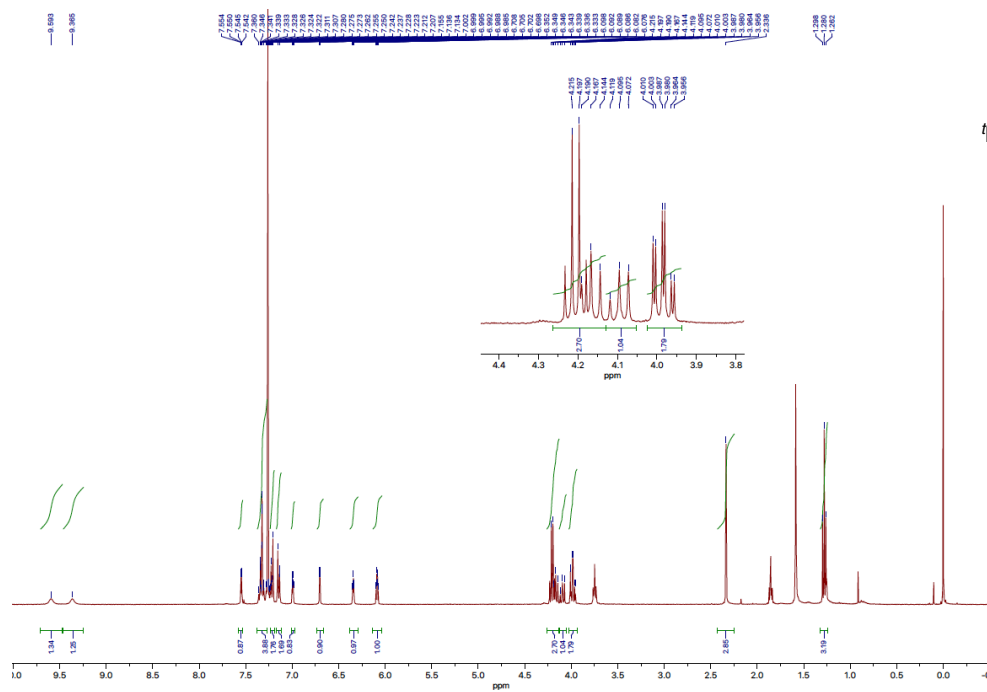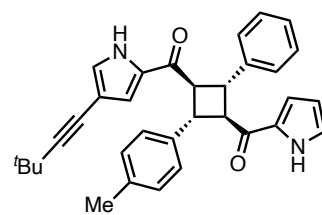

**3ai**

**<sup>13</sup>C NMR (101 MHz, CDCl<sub>3</sub>)**

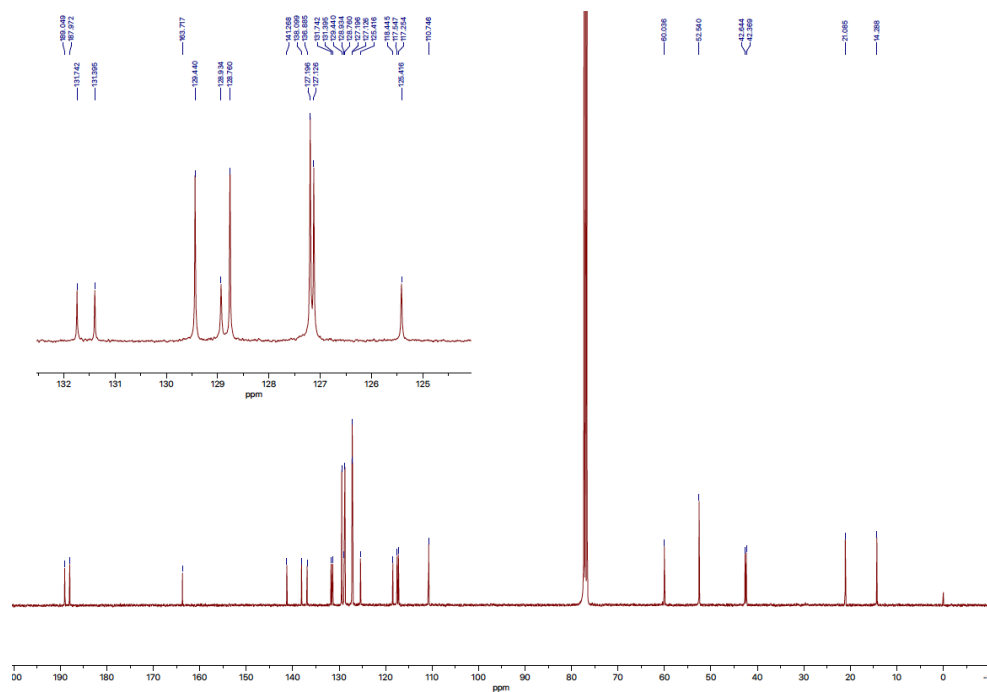

3bj

<sup>1</sup>H NMR (400 MHz, CDCl<sub>3</sub>)

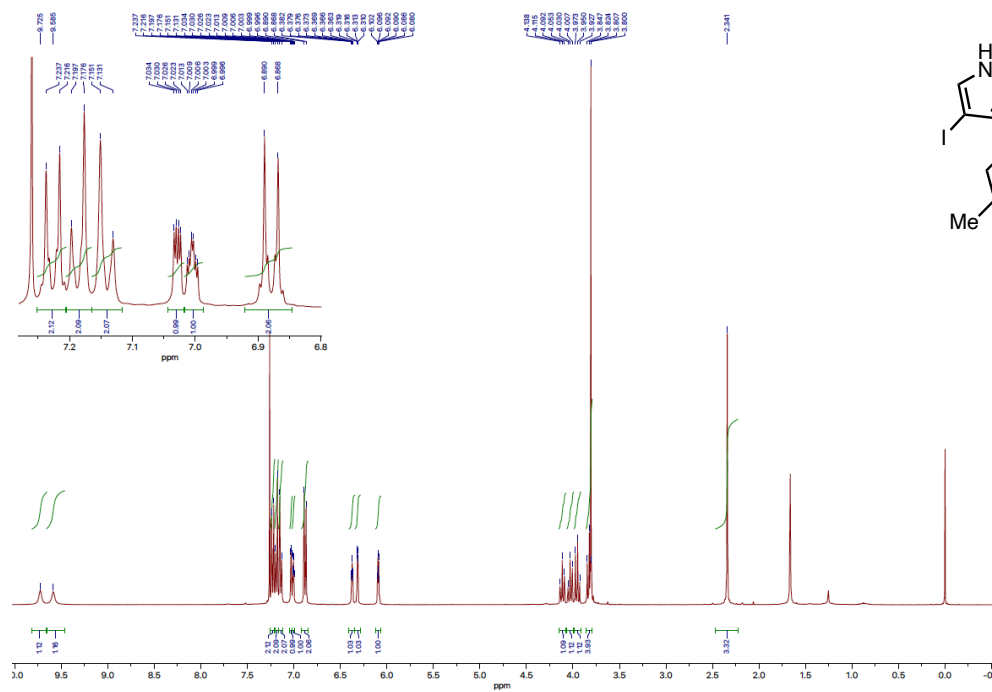

<sup>13</sup>C NMR (101 MHz, CDCl<sub>3</sub>)

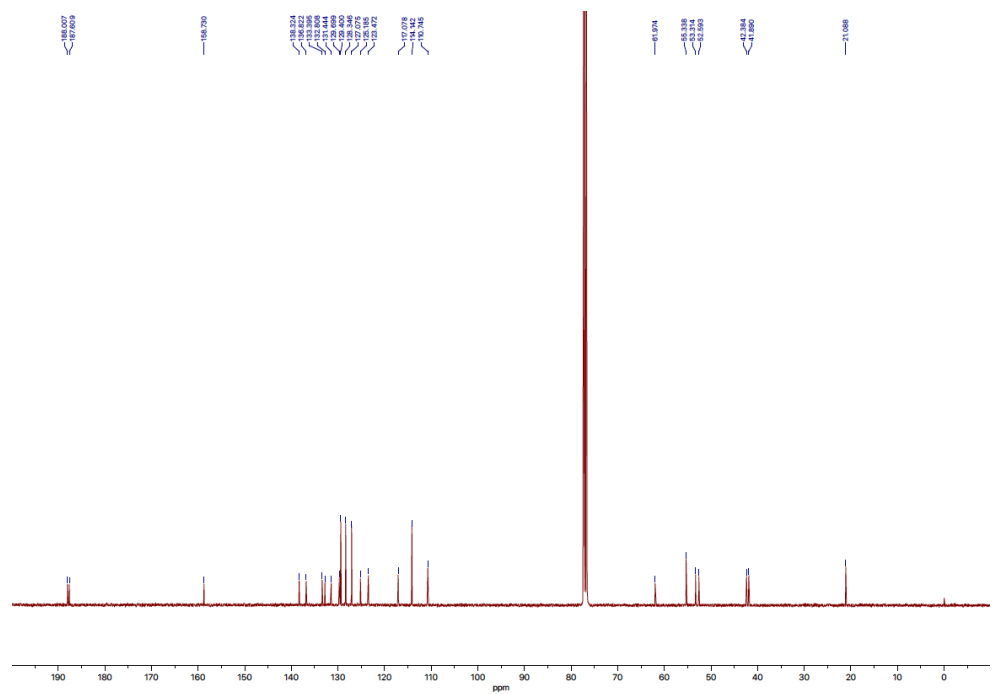

**3bk**

**$^1\text{H}$  NMR (400 MHz,  $\text{CDCl}_3$ )**

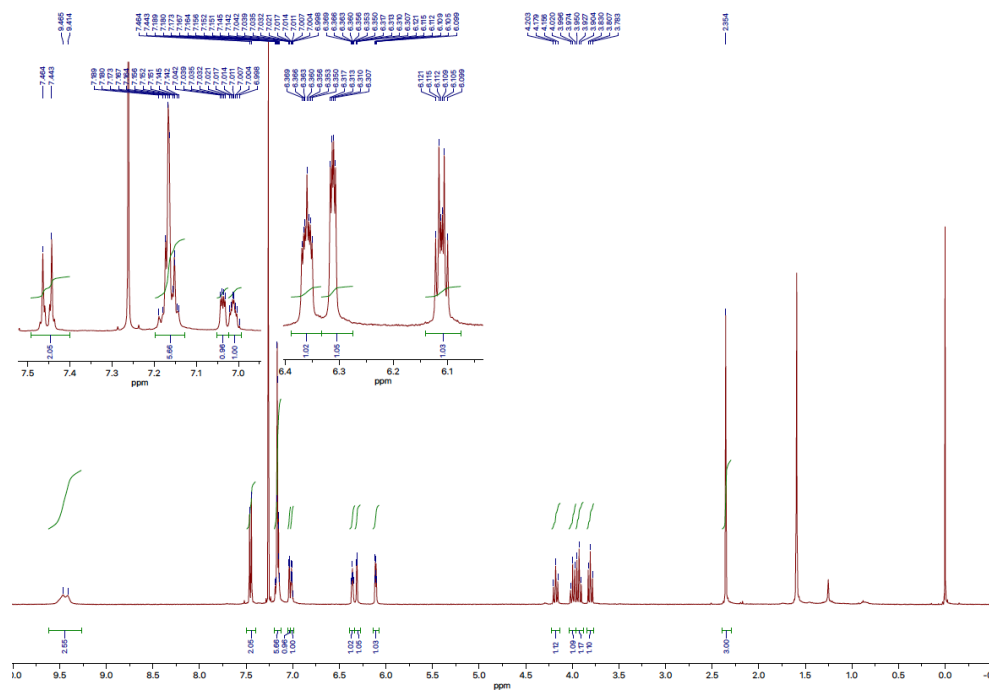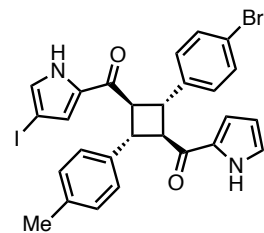

**3bk**

**$^{13}\text{C}$  NMR (101 MHz,  $\text{CDCl}_3$ )**

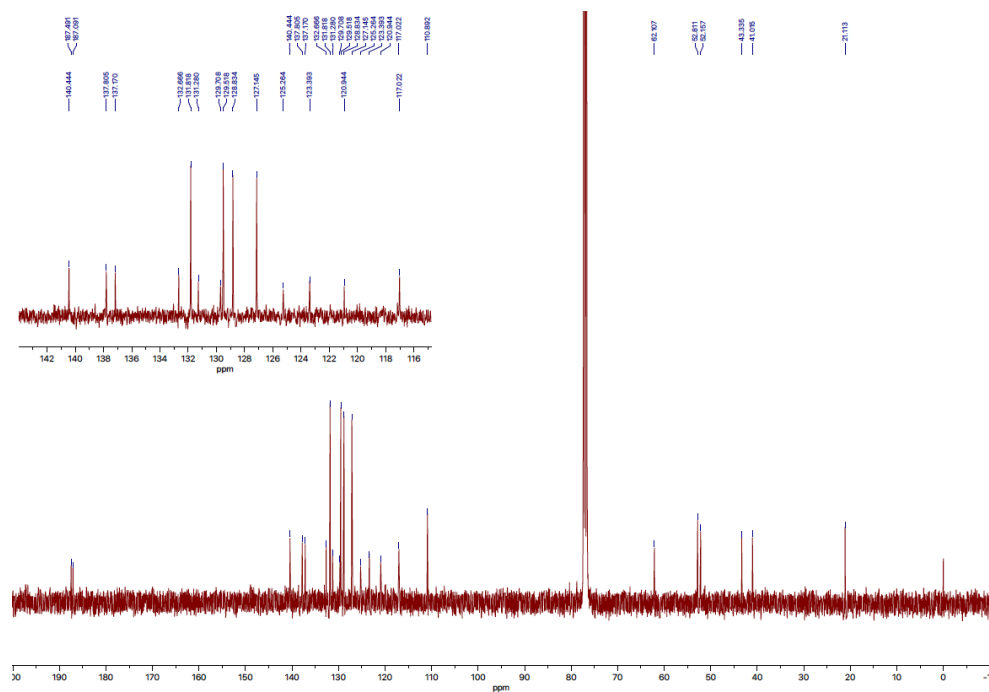

**3bl**

**<sup>1</sup>H NMR (400 MHz, CDCl<sub>3</sub>)**

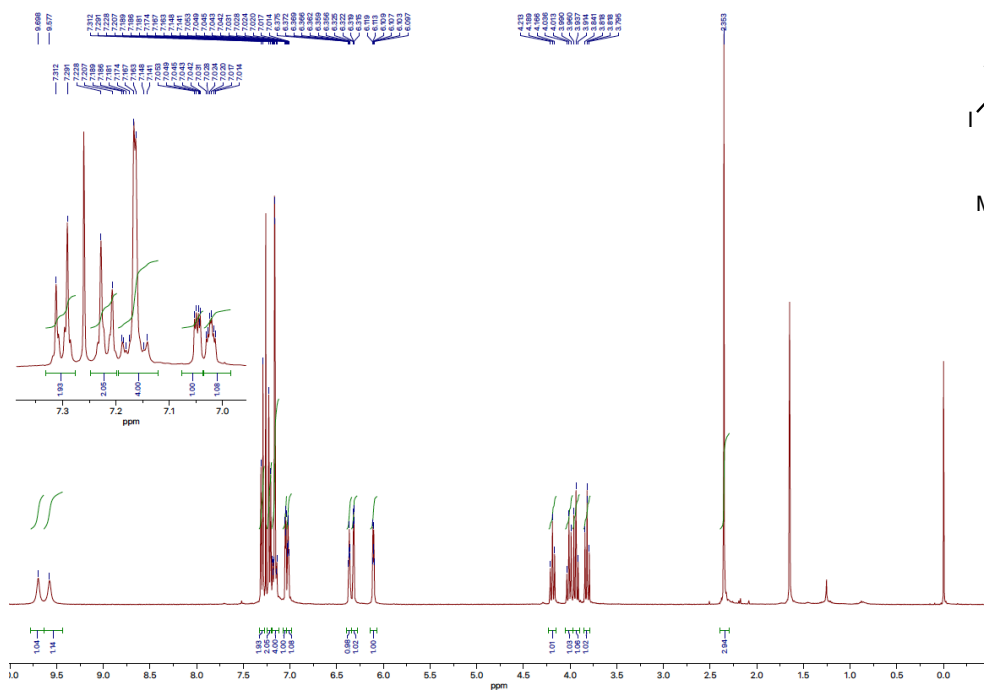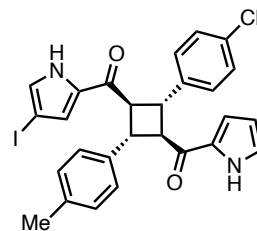

**3bl**

**<sup>13</sup>C NMR (101 MHz, CDCl<sub>3</sub>)**

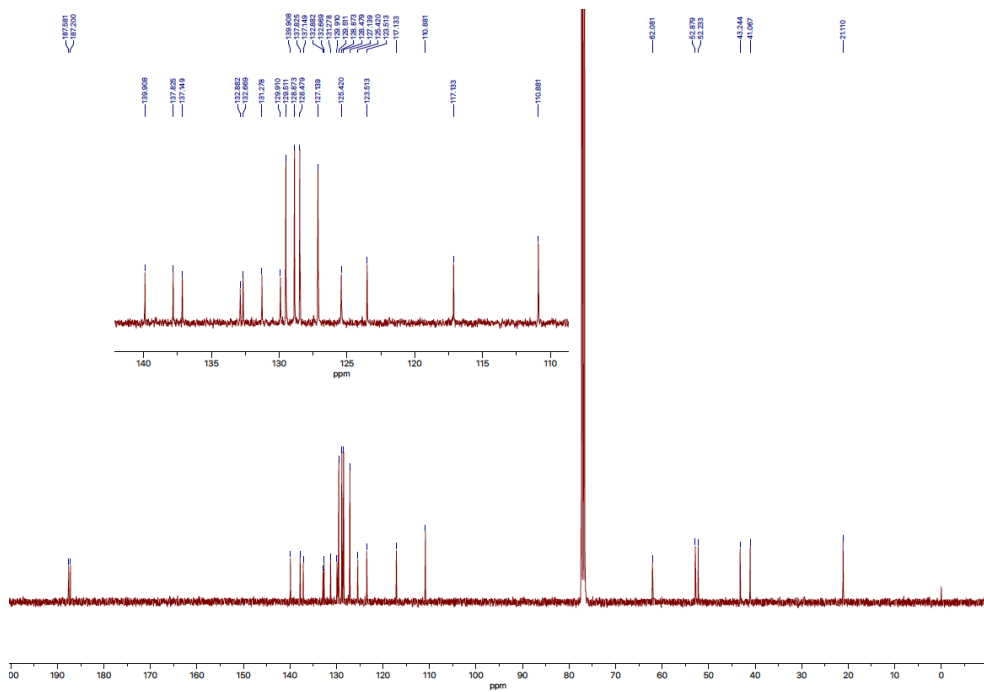

3bm

$^1\text{H}$  NMR (400 MHz,  $\text{CDCl}_3$ )

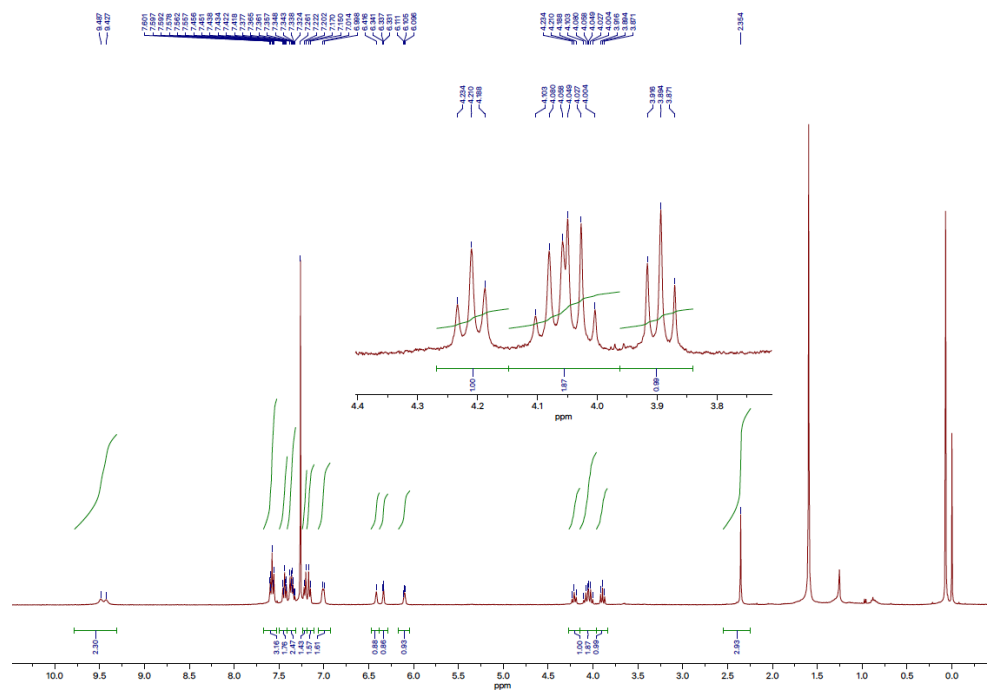

$^{13}\text{C}$  NMR (101 MHz,  $\text{CDCl}_3$ )

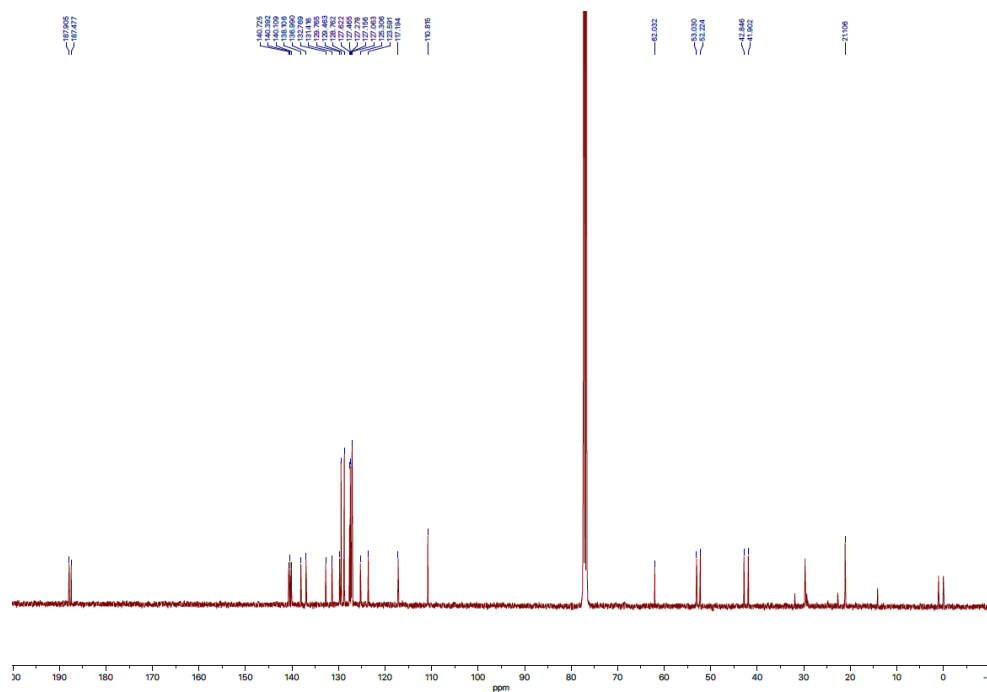











3jr

<sup>1</sup>H NMR (400 MHz, CDCl<sub>3</sub>)

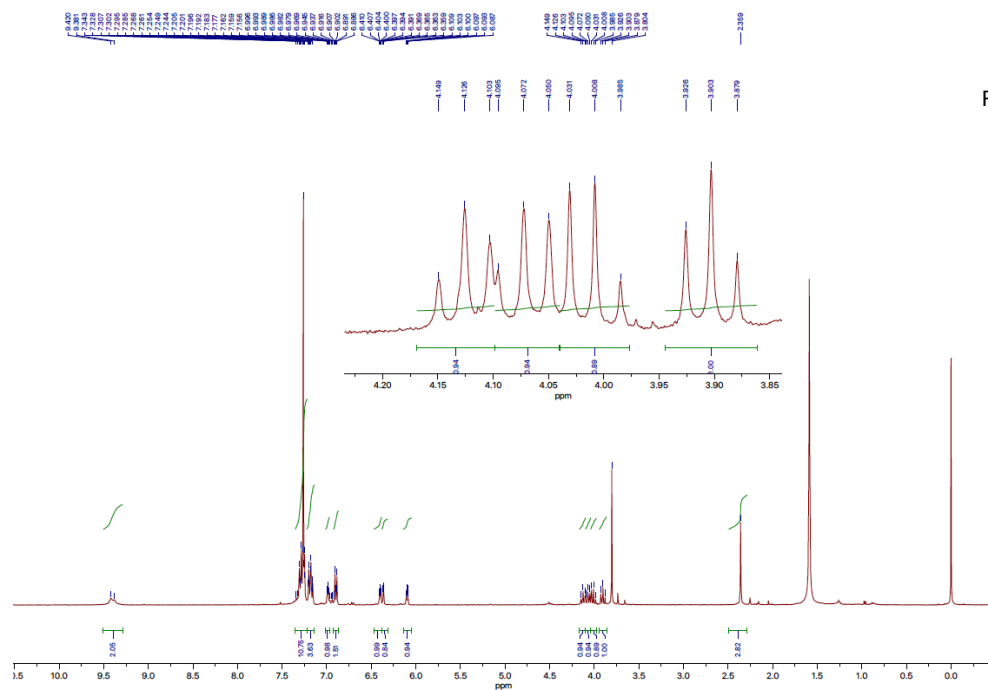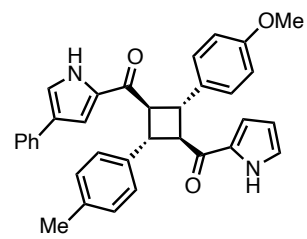

3jr

<sup>13</sup>C NMR (101 MHz, CDCl<sub>3</sub>)

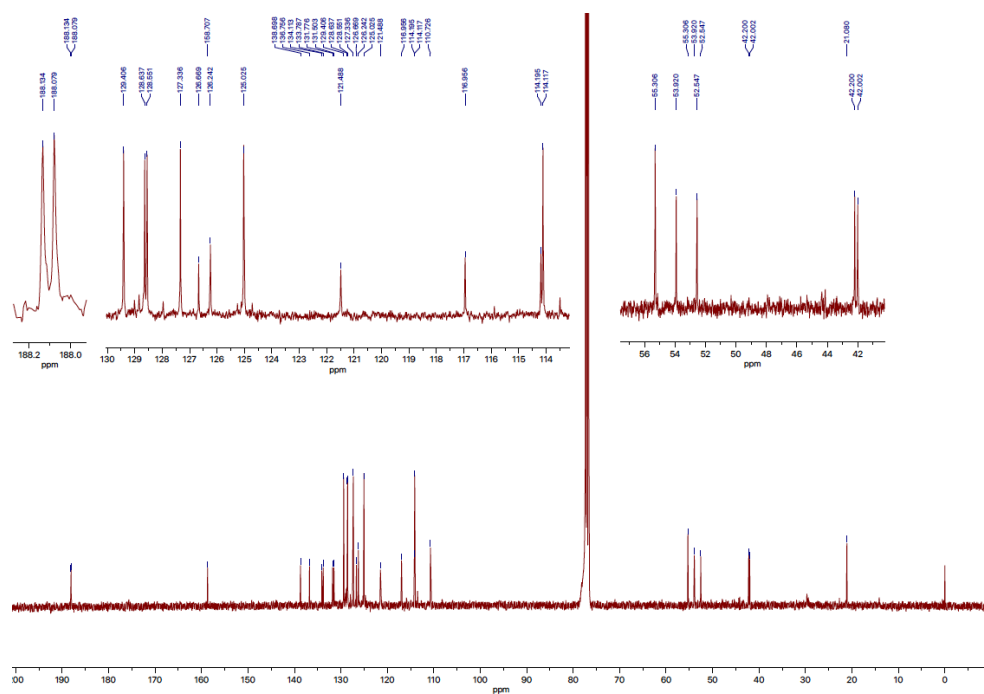



3cl

$^1\text{H NMR}$  (400 MHz,  $\text{CDCl}_3$ )

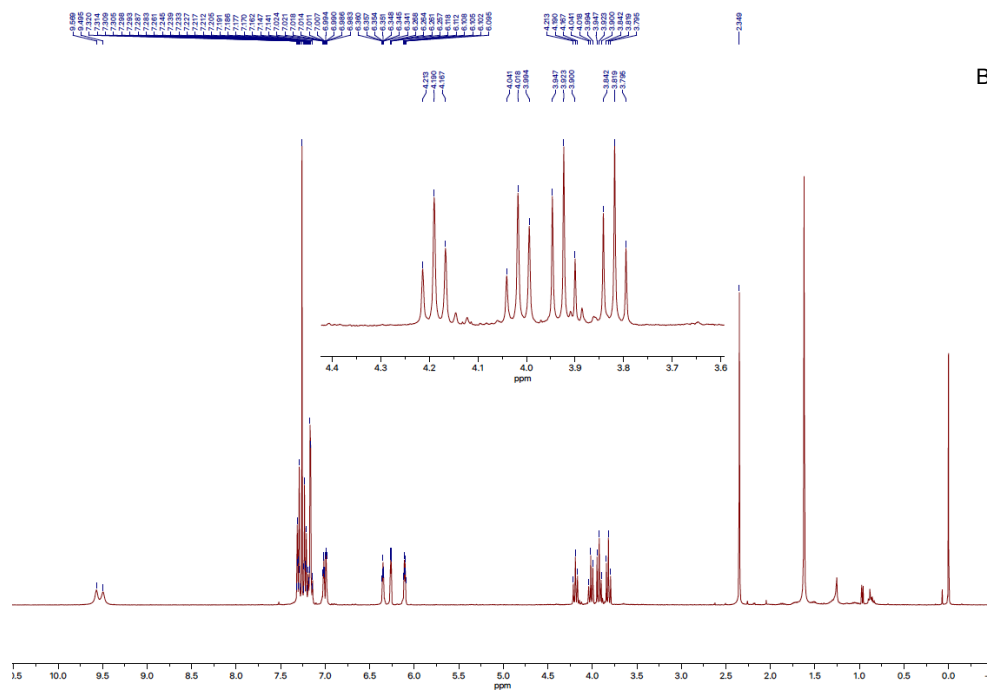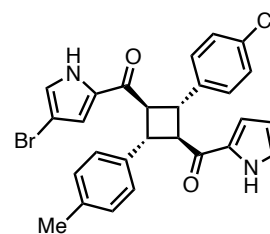

3cl

$^{13}\text{C NMR}$  (101 MHz,  $\text{CDCl}_3$ )

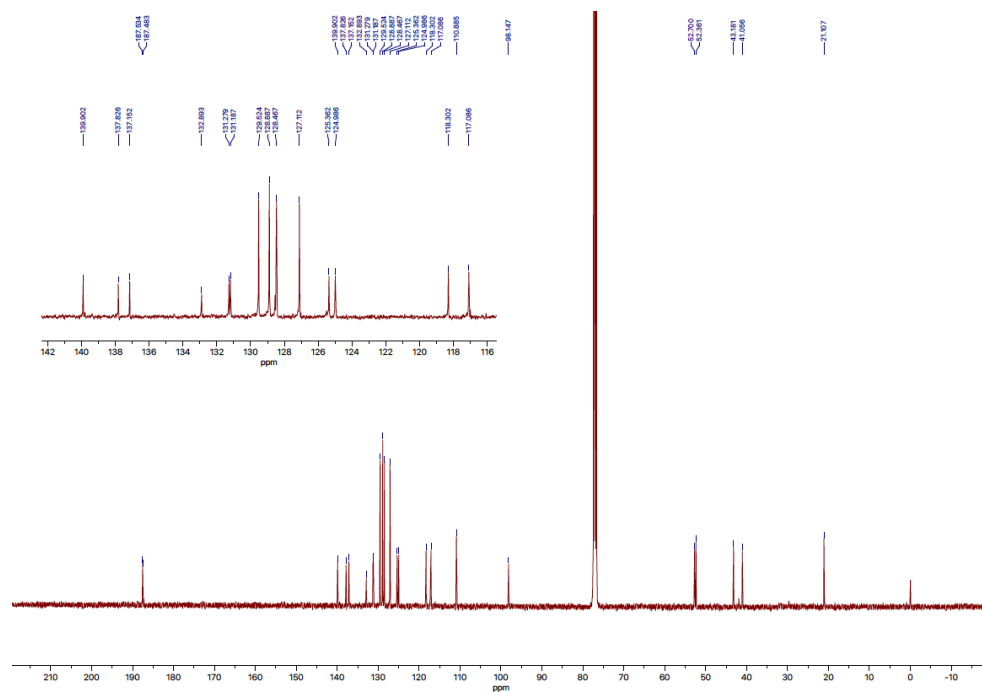

3cm

<sup>1</sup>H NMR (400 MHz, CDCl<sub>3</sub>)

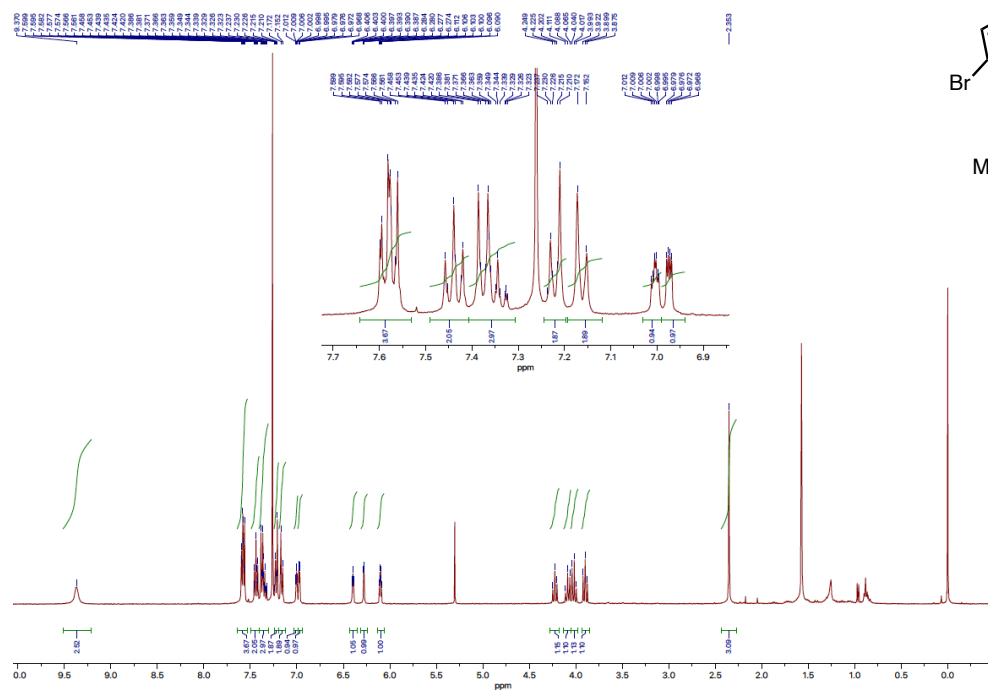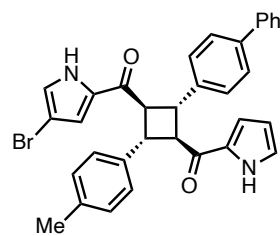

3cm

<sup>13</sup>C NMR (101 MHz, CDCl<sub>3</sub>)

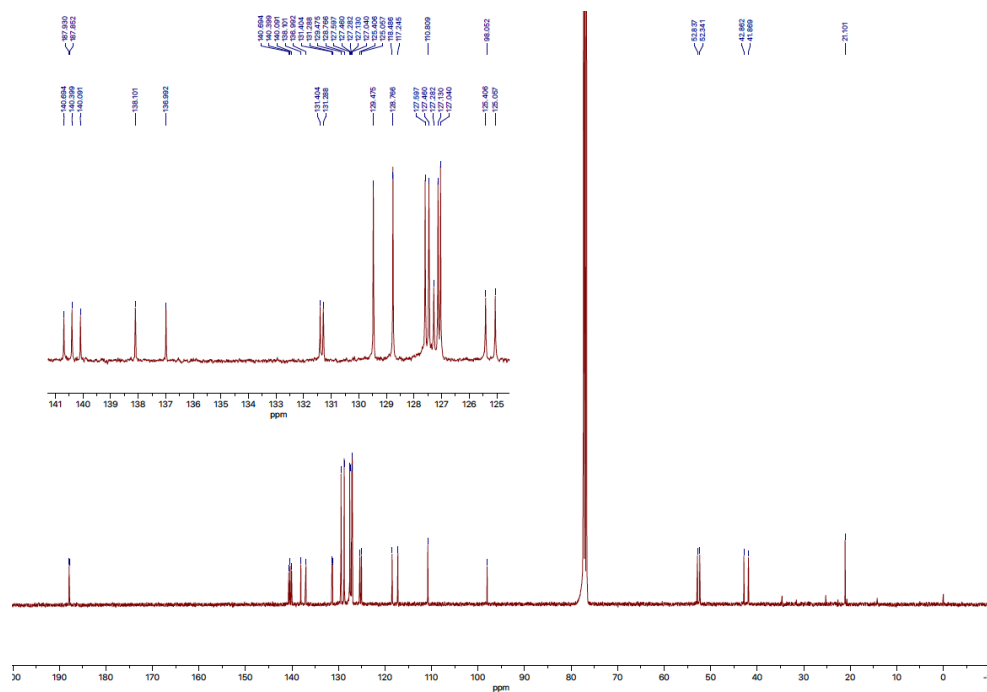



2b

$^1\text{H}$  NMR (400 MHz,  $\text{CDCl}_3$ )

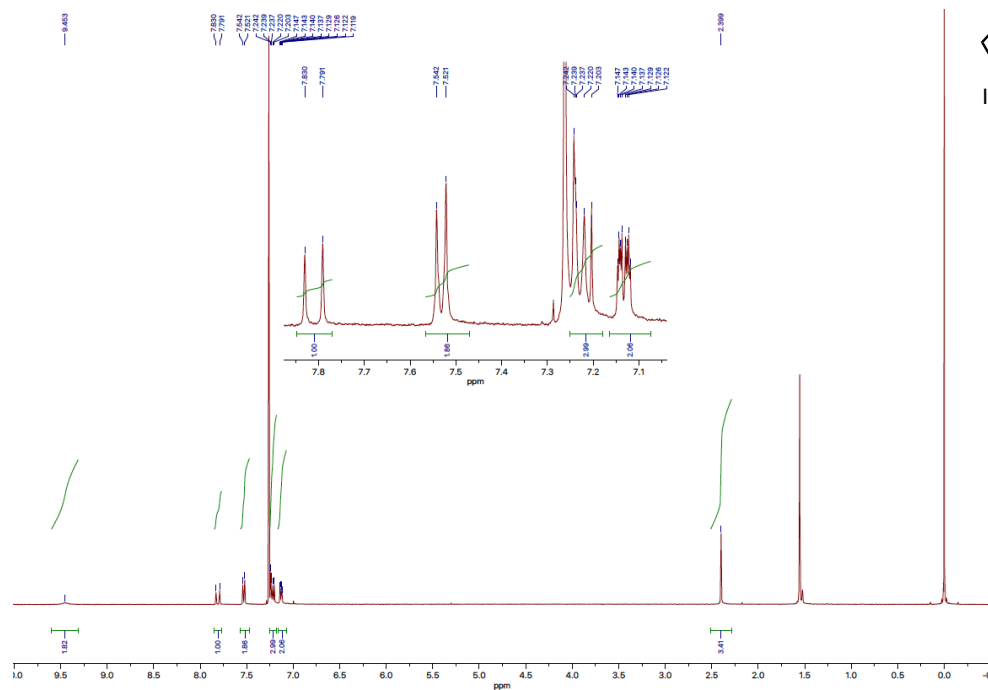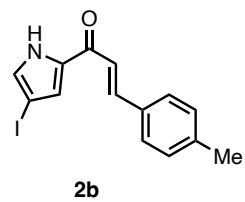

$^{13}\text{C}$  NMR (101 MHz,  $\text{CDCl}_3$ )

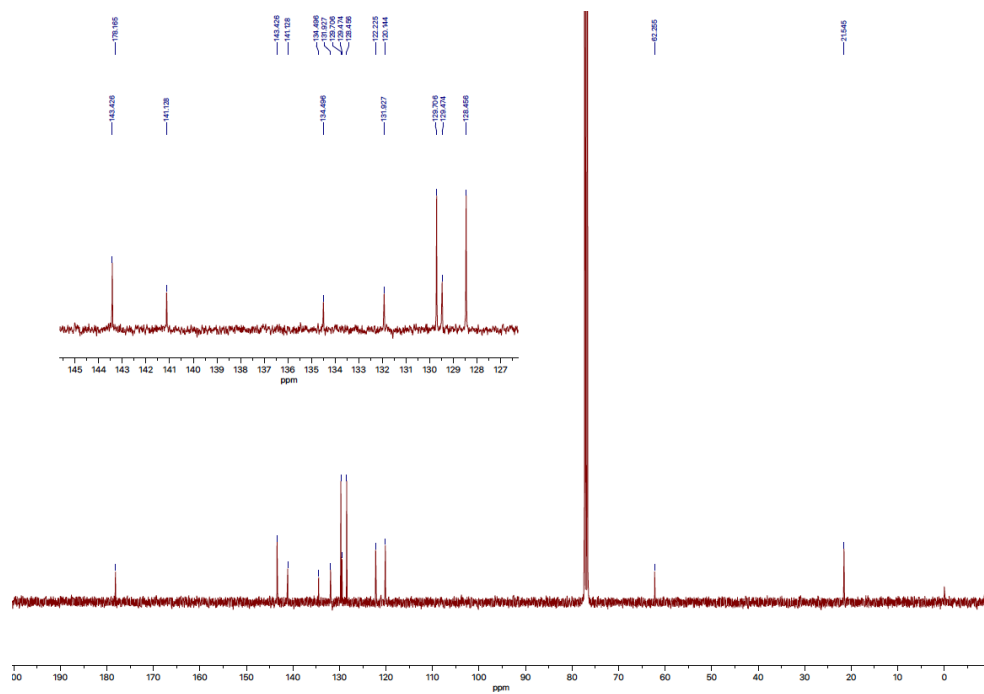

2c

$^1\text{H}$  NMR (400 MHz,  $\text{CDCl}_3$ )

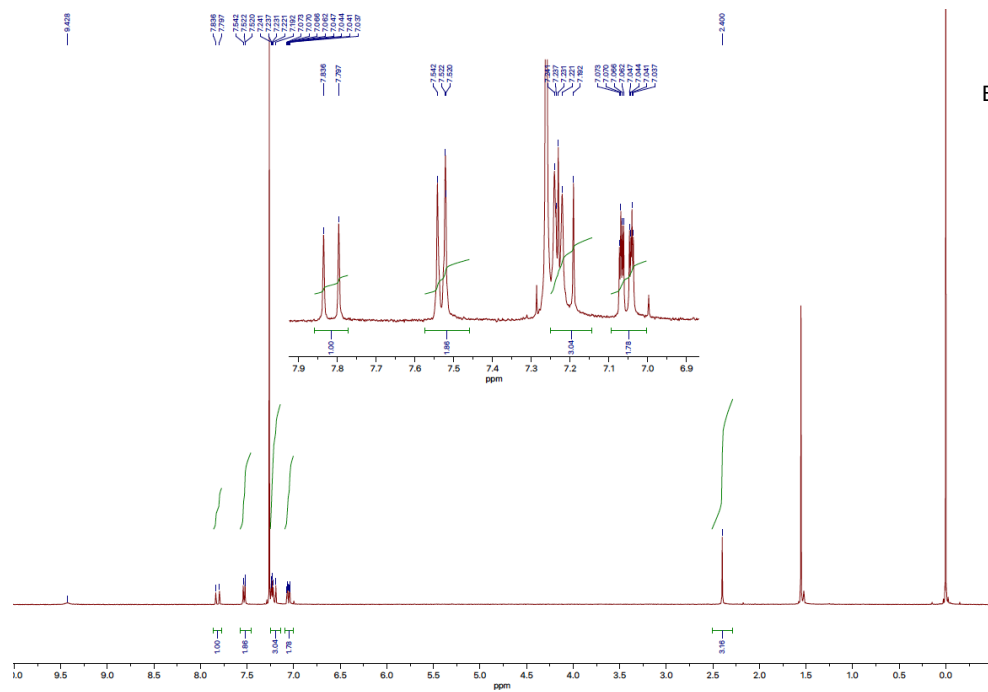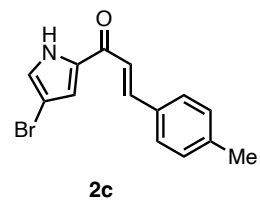

$^{13}\text{C}$  NMR (101 MHz,  $\text{CDCl}_3$ )

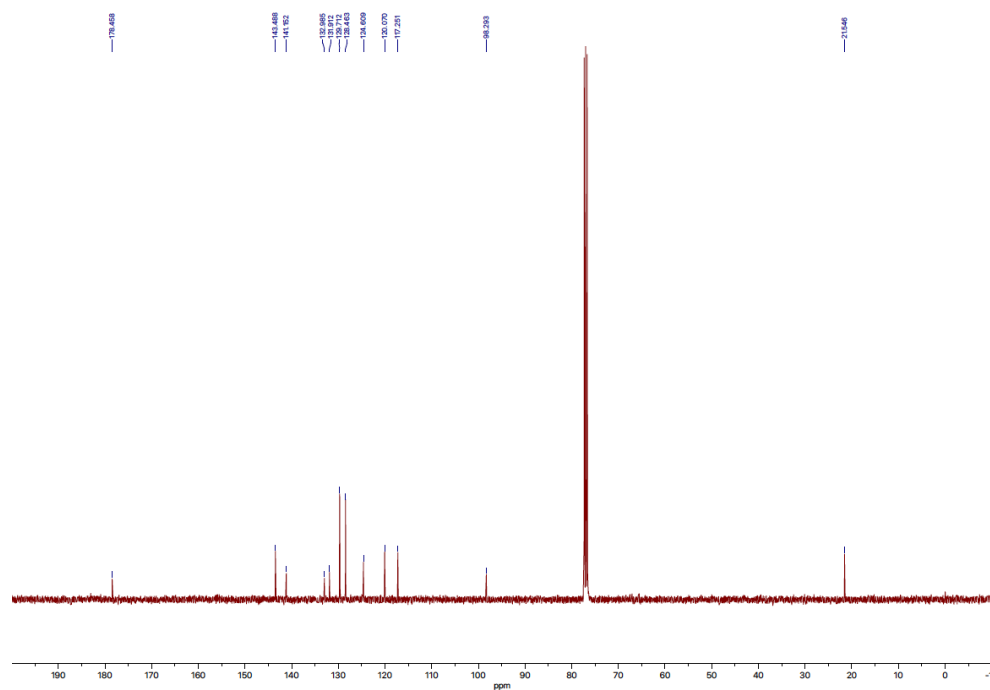

2d

$^1\text{H}$  NMR (400 MHz,  $\text{CDCl}_3$ )

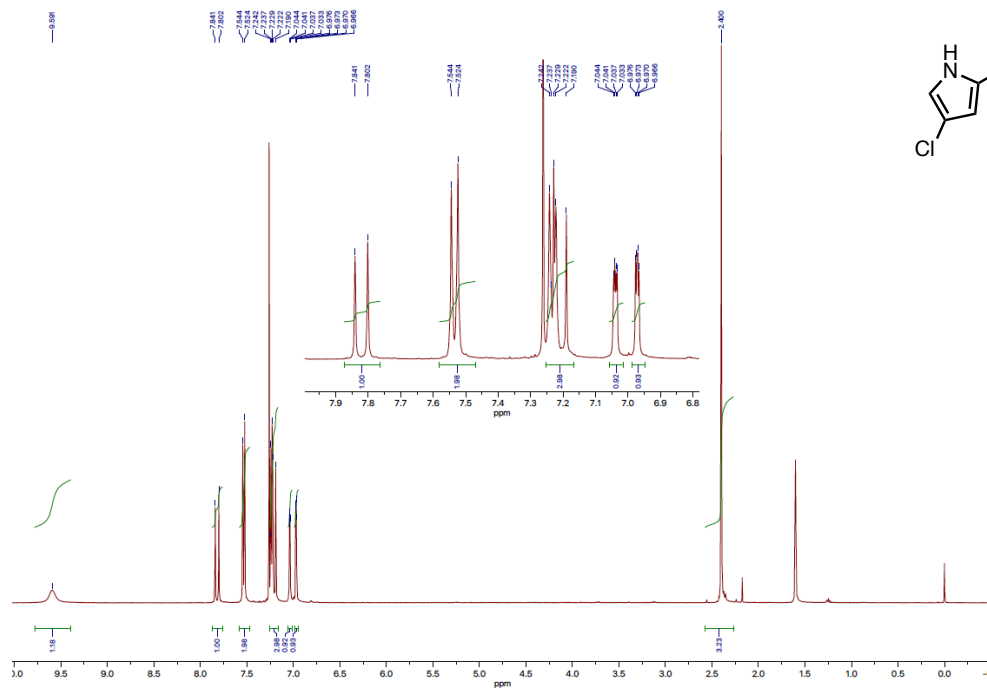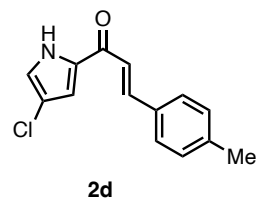

$^{13}\text{C}$  NMR (101 MHz,  $\text{CDCl}_3$ )

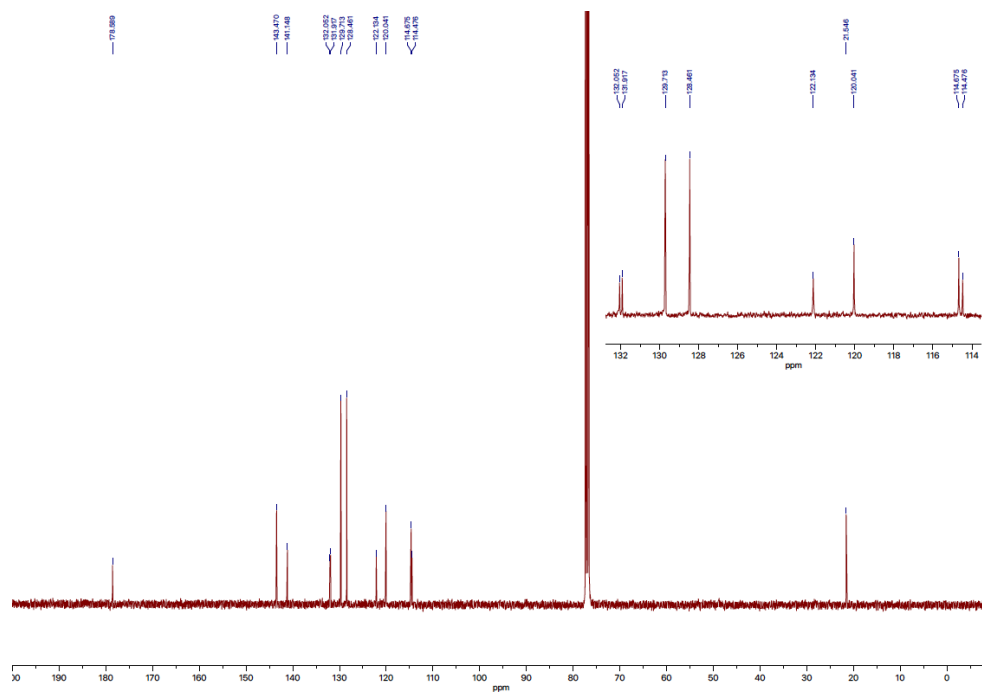

2e

$^1\text{H}$  NMR (400 MHz,  $\text{CDCl}_3$ )

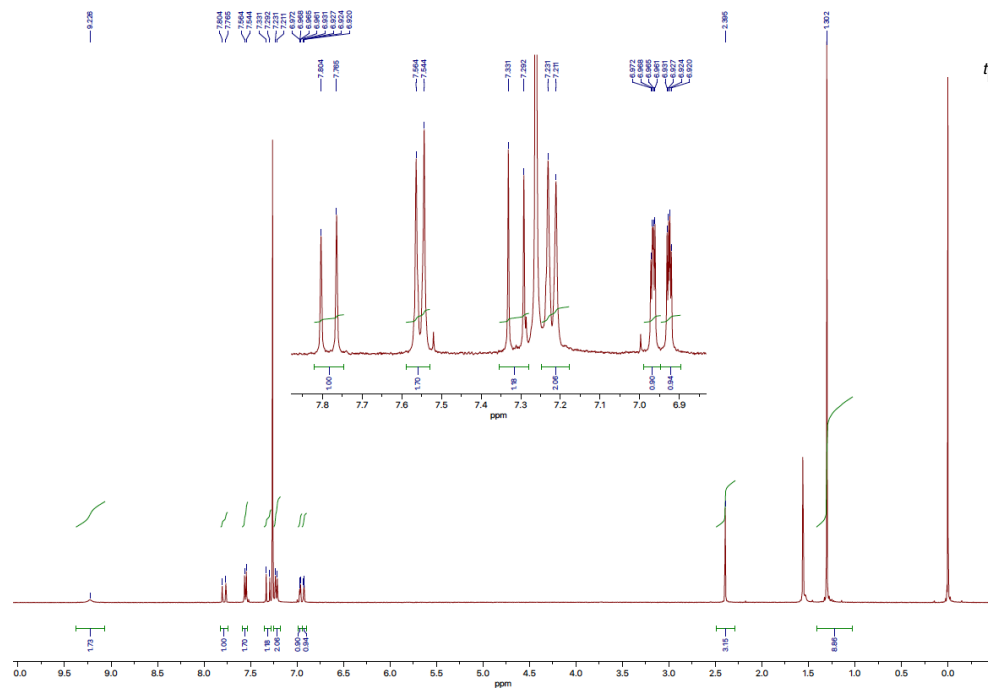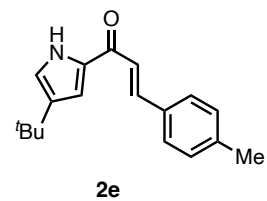

$^{13}\text{C}$  NMR (101 MHz,  $\text{CDCl}_3$ )

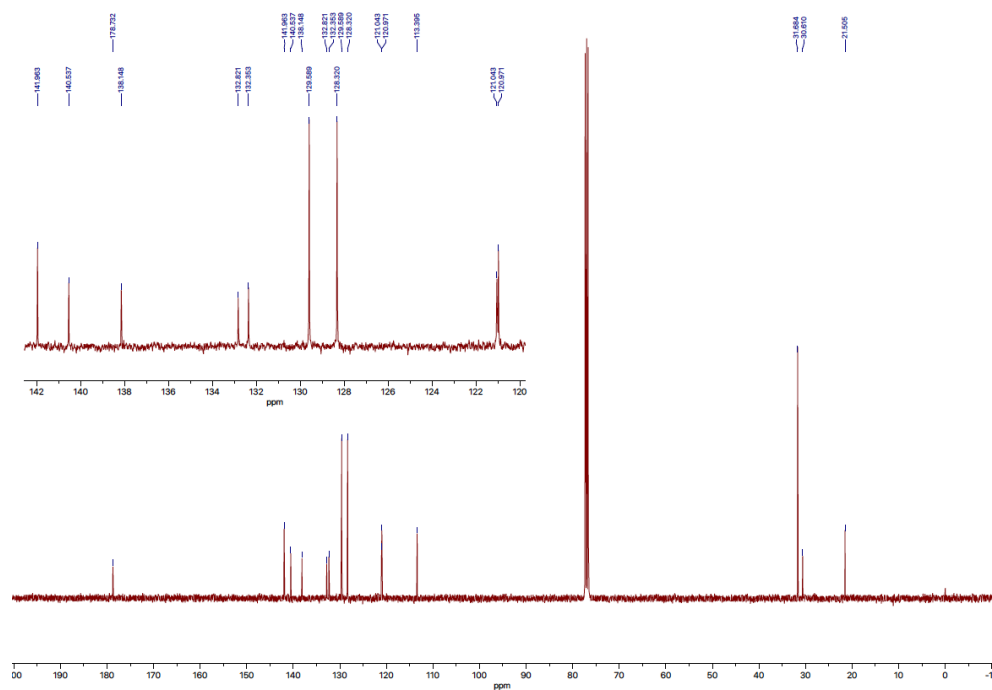





2h

$^1\text{H}$  NMR (400 MHz,  $\text{CDCl}_3$ )

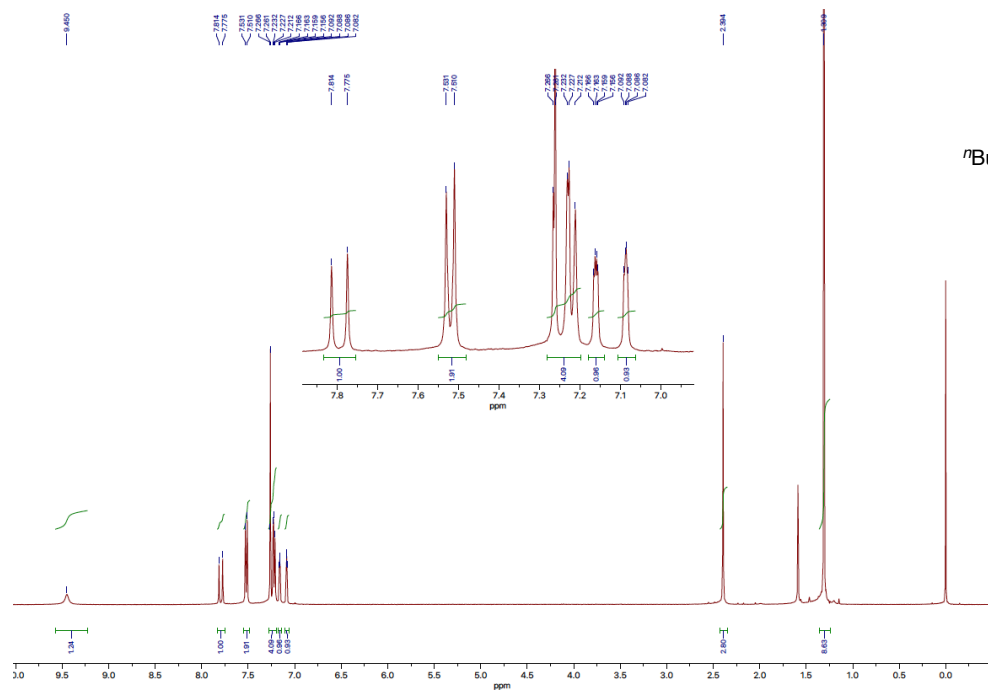

$^{13}\text{C}$  NMR (101 MHz,  $\text{CDCl}_3$ )

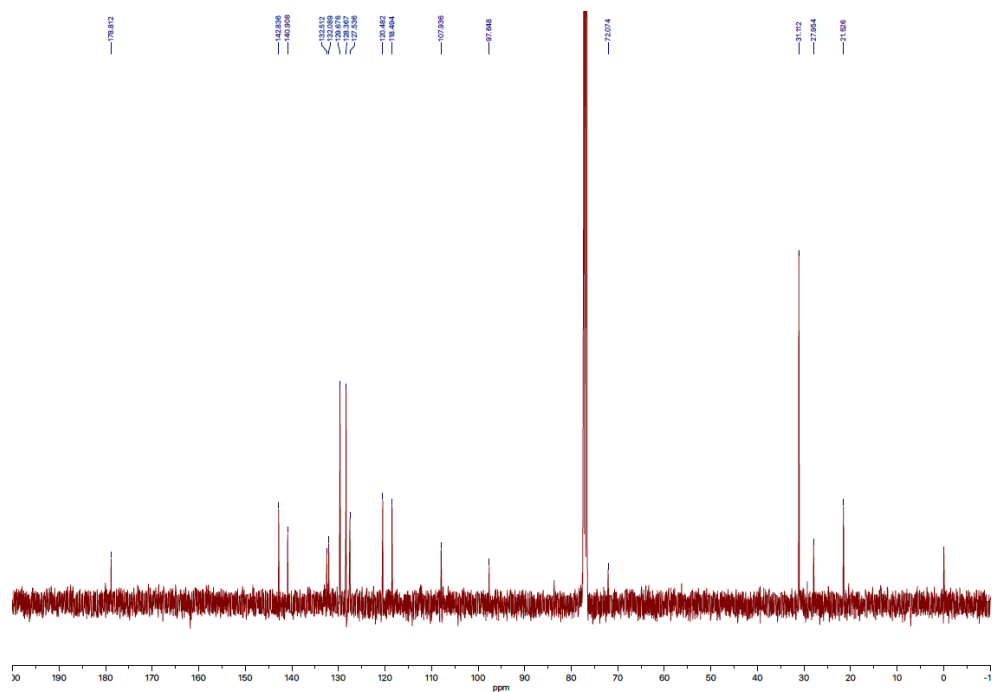





2m

<sup>1</sup>H NMR (400 MHz, CDCl<sub>3</sub>)

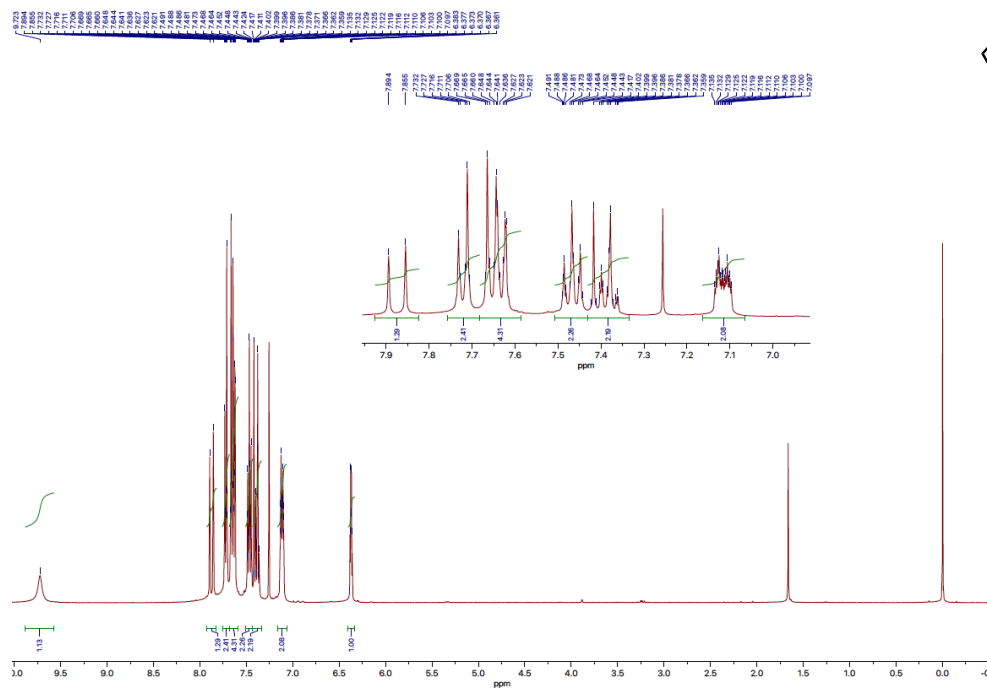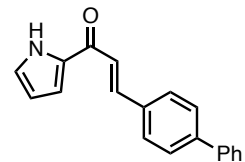

2m

<sup>13</sup>C NMR (101 MHz, CDCl<sub>3</sub>)

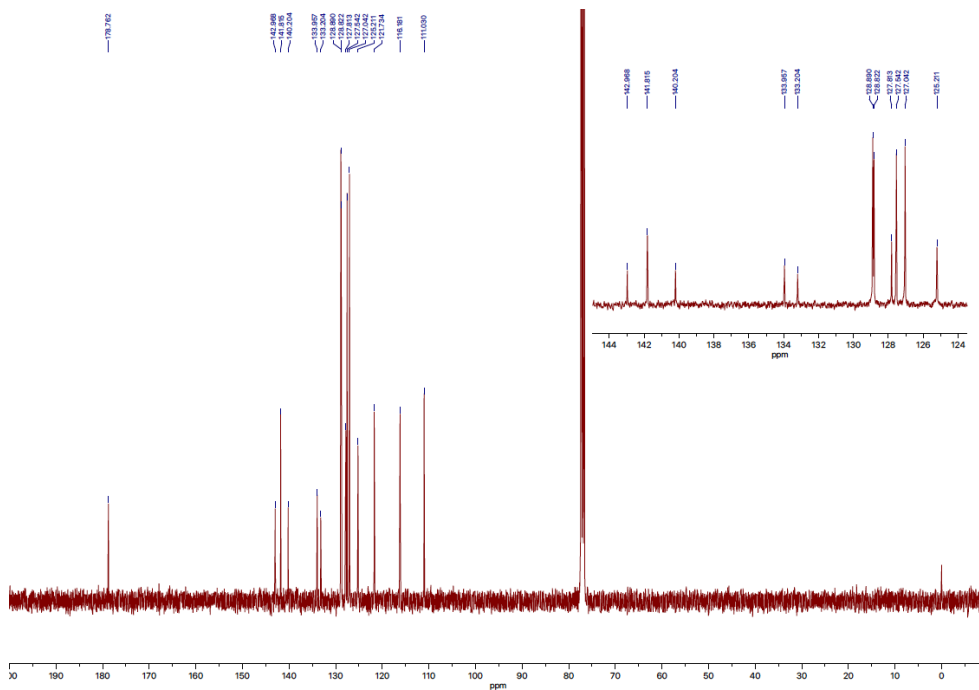

2n

<sup>1</sup>H NMR (400 MHz, CDCl<sub>3</sub>)

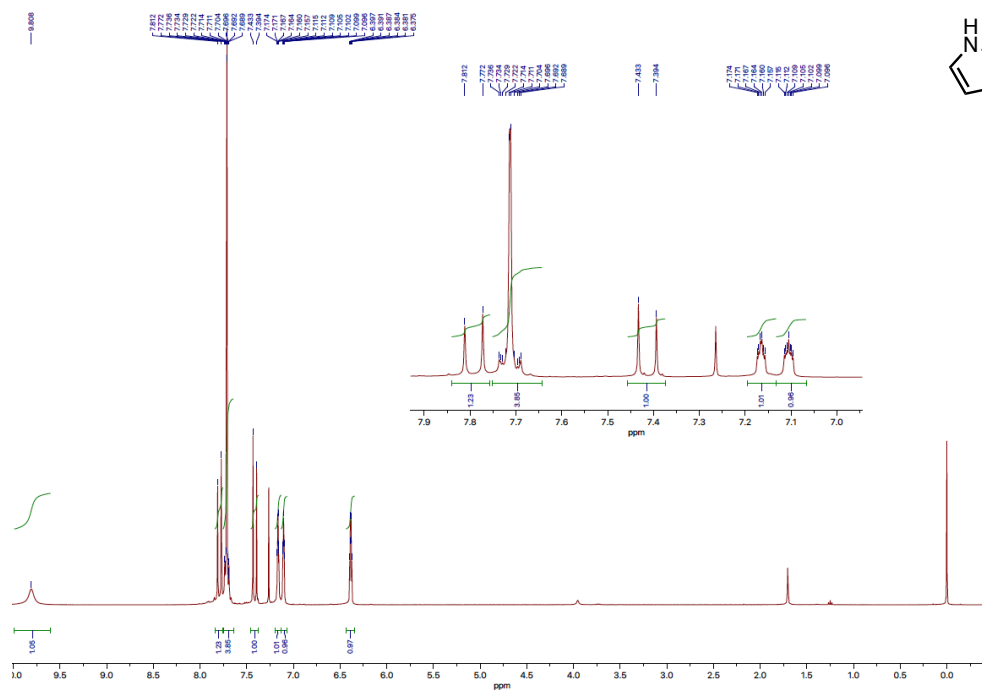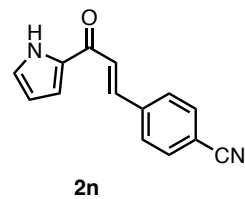

<sup>13</sup>C NMR (101 MHz, CDCl<sub>3</sub>)

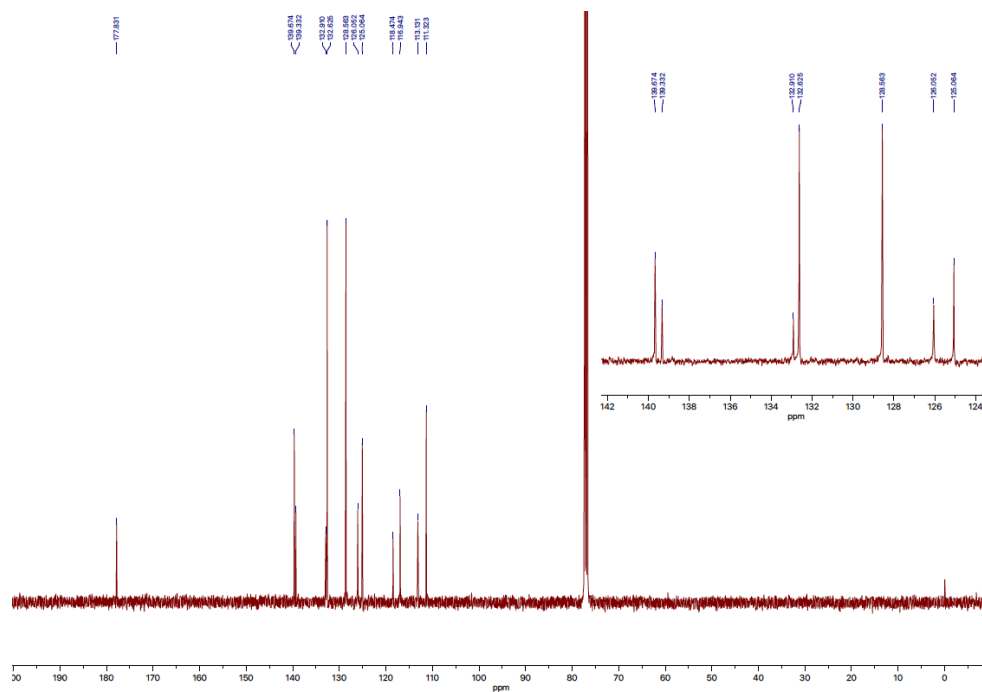

2o

<sup>1</sup>H NMR (400 MHz, CDCl<sub>3</sub>)

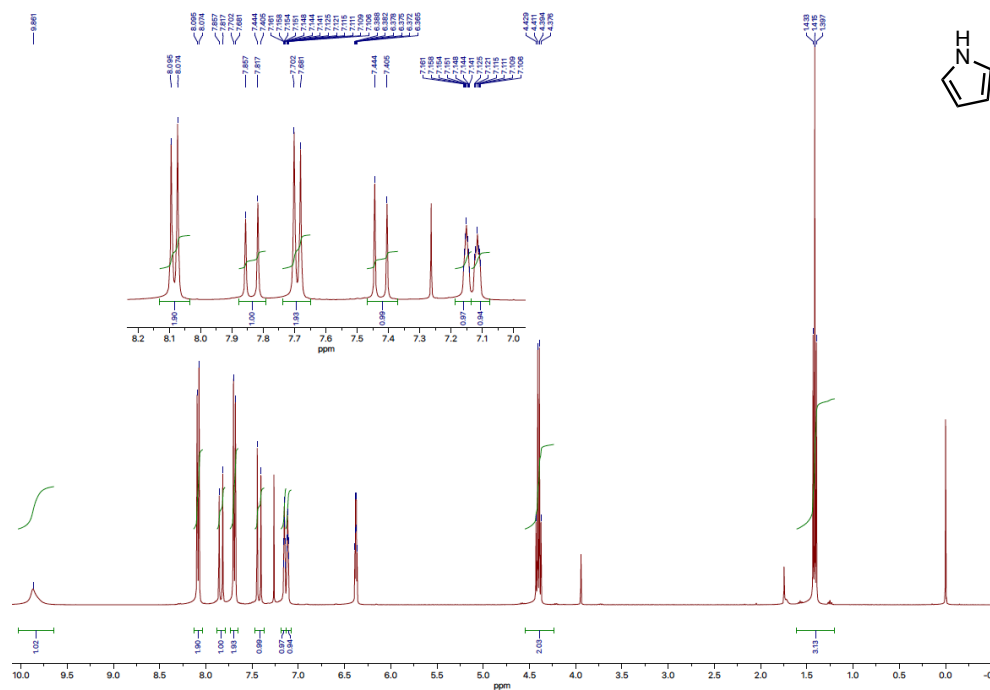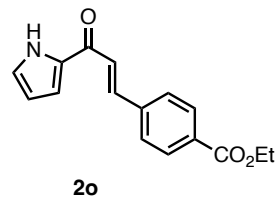

<sup>13</sup>C NMR (101 MHz, CDCl<sub>3</sub>)

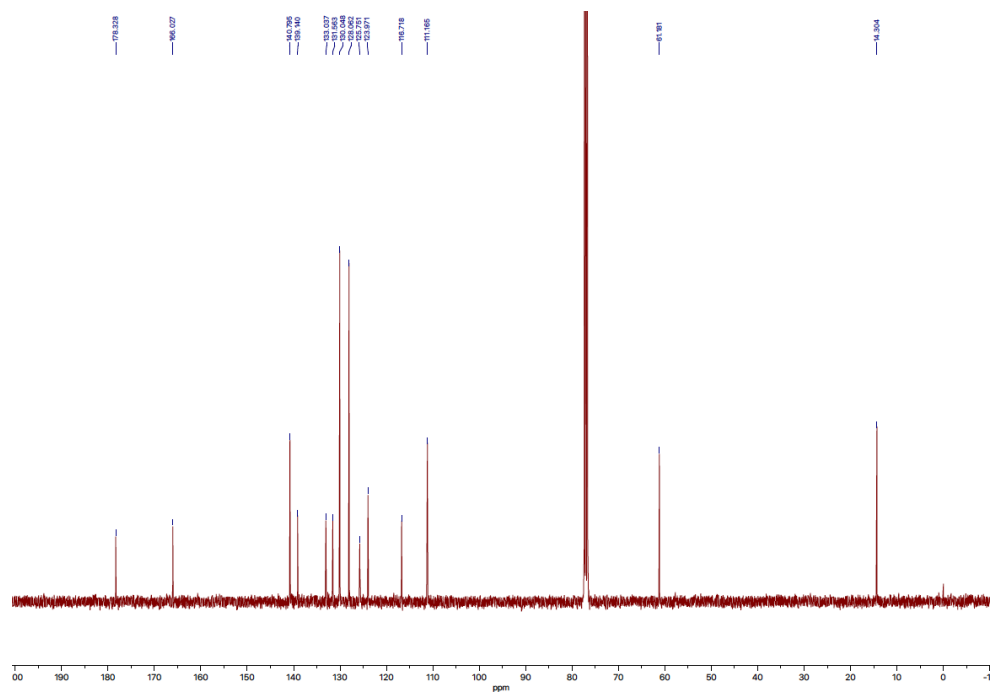

2p

$^1\text{H}$  NMR (400 MHz,  $\text{CDCl}_3$ )

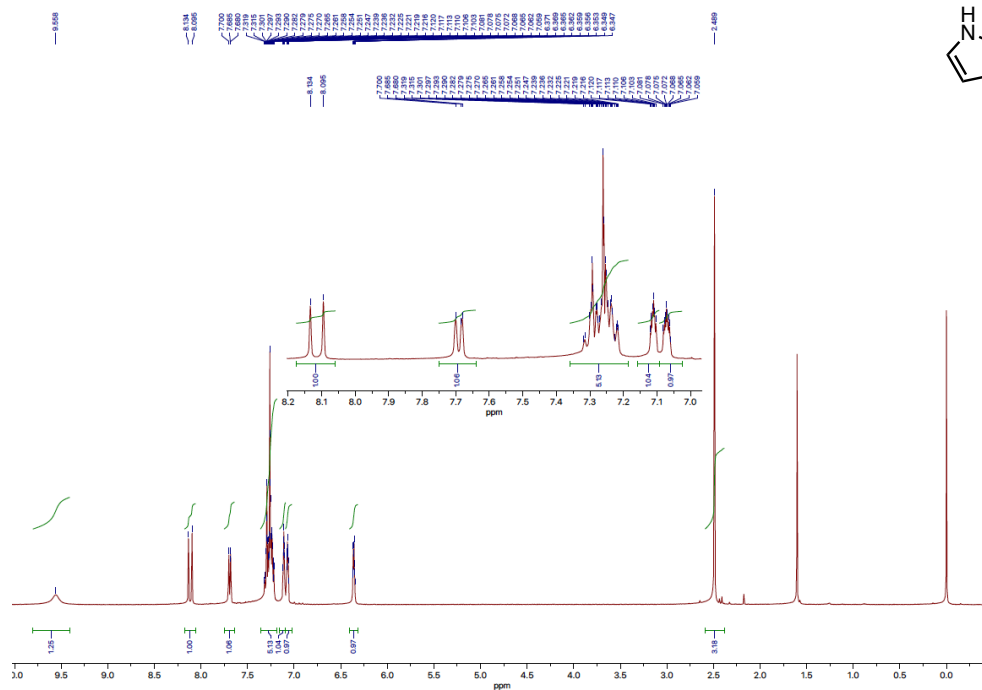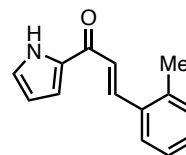

2p

$^{13}\text{C}$  NMR (101 MHz,  $\text{CDCl}_3$ )

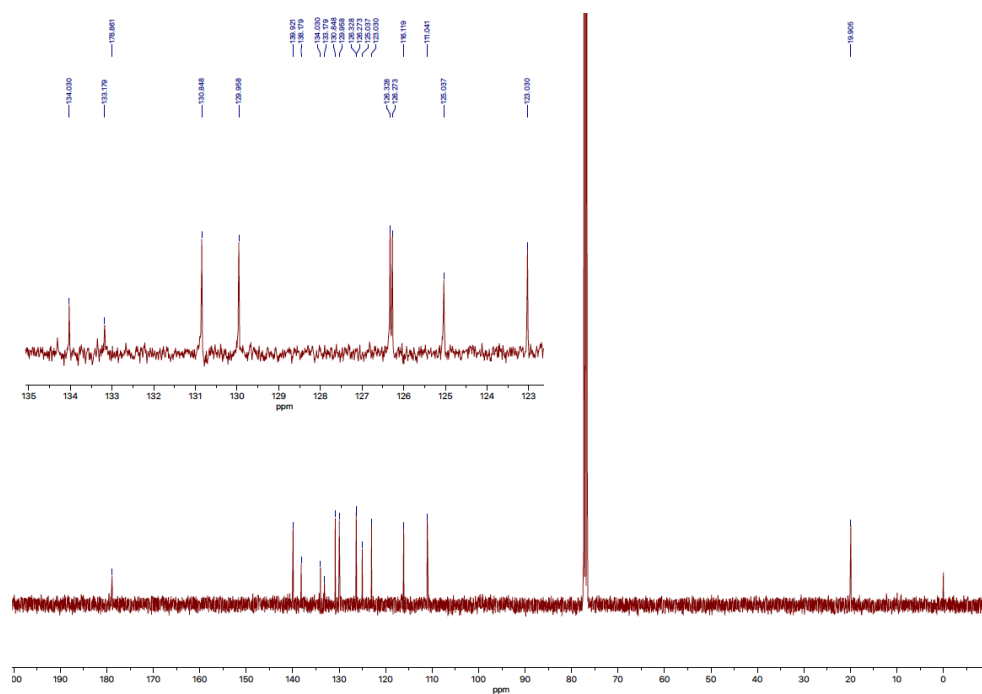

2q

<sup>1</sup>H NMR (400 MHz, CDCl<sub>3</sub>)

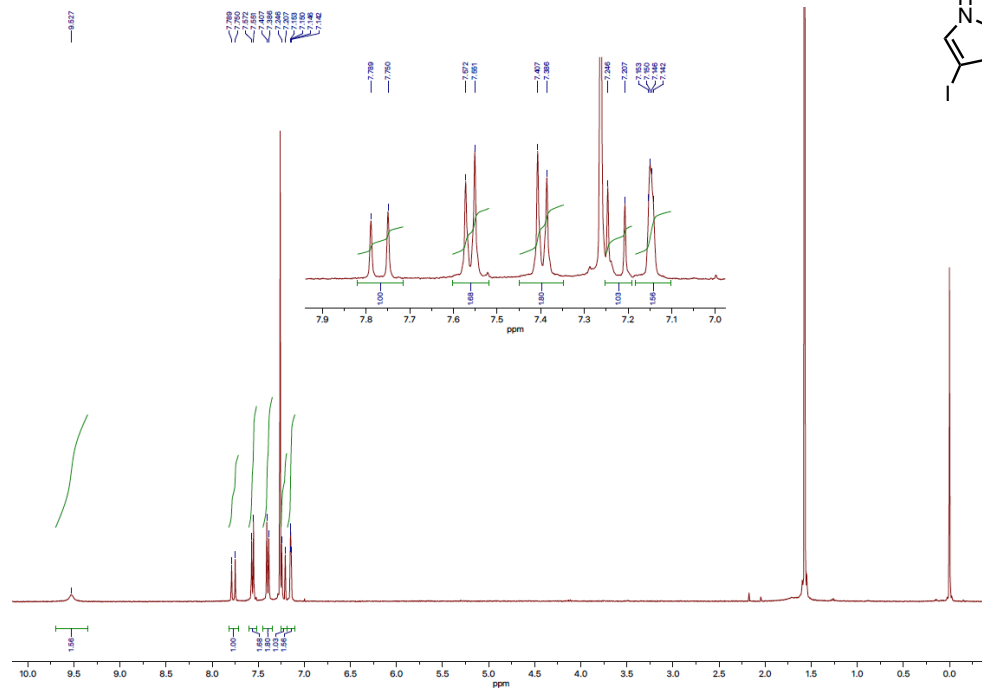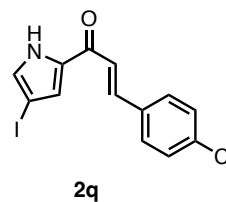

<sup>13</sup>C NMR (101 MHz, CDCl<sub>3</sub>)

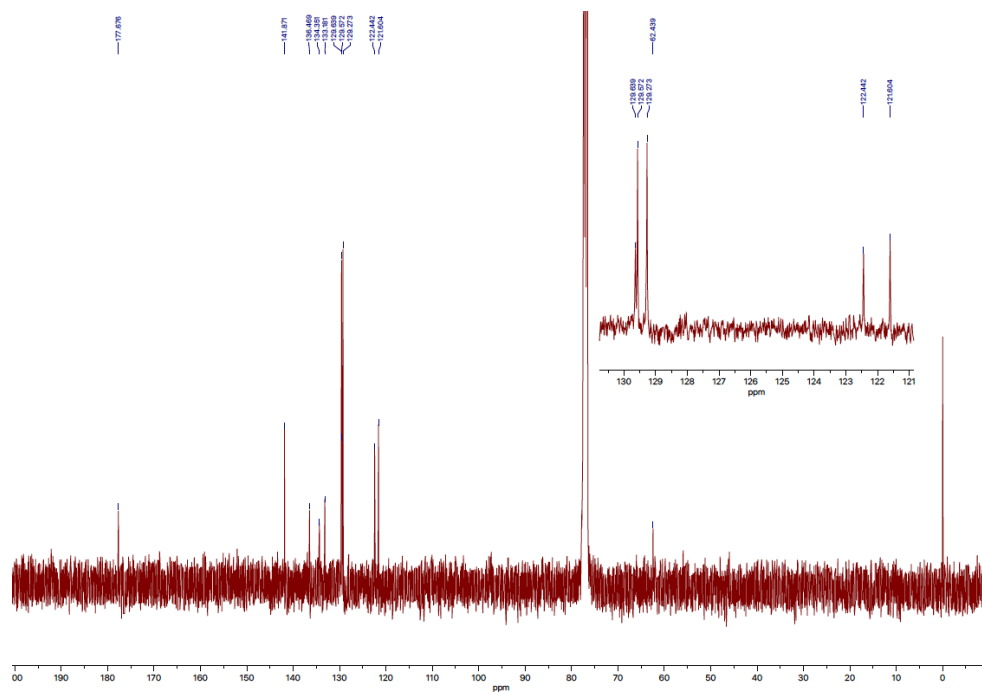

2r

<sup>1</sup>H NMR (400 MHz, CDCl<sub>3</sub>)

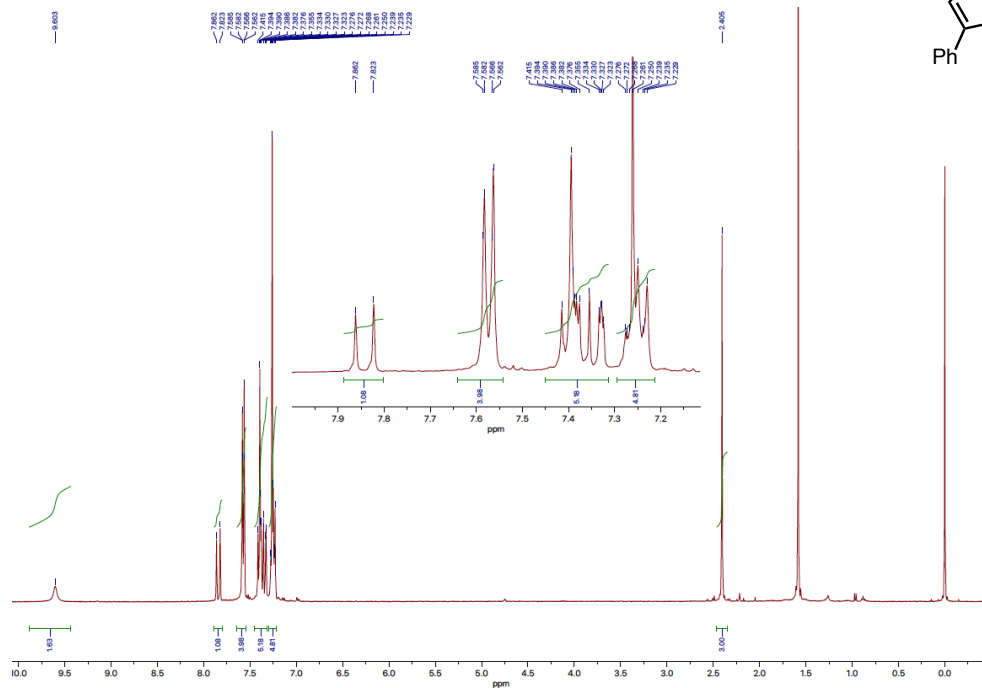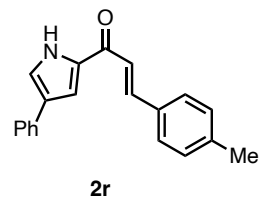

<sup>13</sup>C NMR (101 MHz, CDCl<sub>3</sub>)

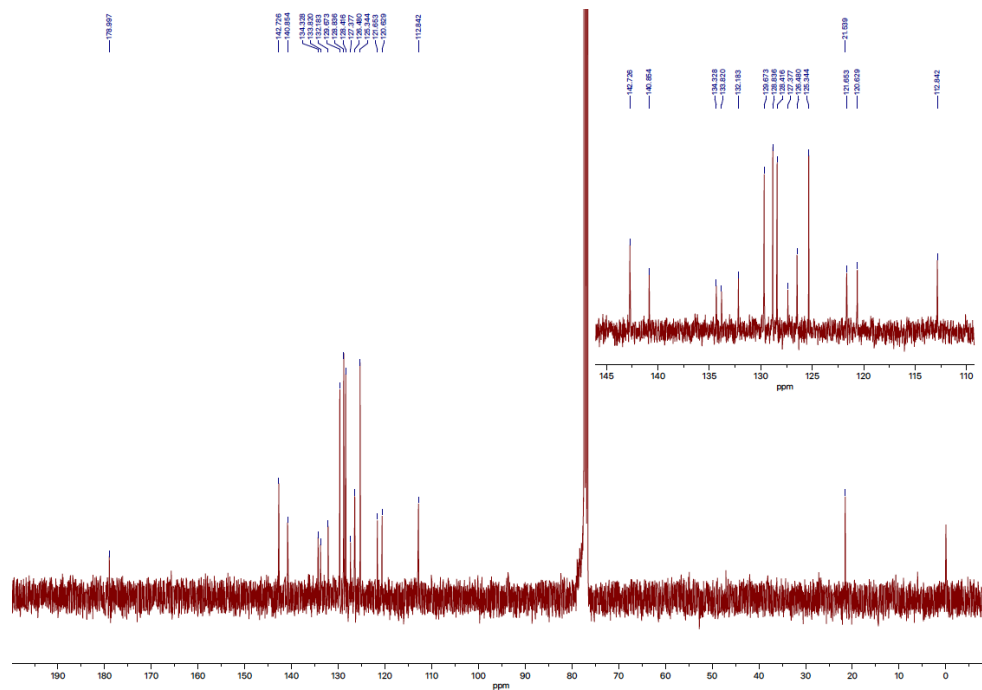

Supplement: d3ob01425h1.pdf [file d3ob01425h1.pdf]
